# Supplementary material for: Inhibitory Effect of CAPE and Kaempferol in Colon Cancer Cell Lines—Possible Implications in New Therapeutic Strategies
Source: MDPI journal article supplement (doi:10.3390/ijms20051199), 2019-03-09
Supplement: s1 [file s1]

**Supplementary Table 1. Microarray results - RKO-Kaempferol 48h - The most differentially expressed coding genes (Top 25 most up/down regulated)**

| GeneSymbol | p (Corr)    | p           | Regulation | FC         | Log FC     |
|------------|-------------|-------------|------------|------------|------------|
| SPX        | 0,009882798 | 0,001819903 | down       | -10,126029 | -3,3399966 |
| TREM1      | 0,018556576 | 0,005763969 | down       | -8,264235  | -3,0468812 |
| C8orf46    | 0,02180454  | 0,007725418 | down       | -6,5076213 | -2,7021303 |
| MAP3K7CL   | 0,006072753 | 5,46E-05    | down       | -5,827643  | -2,5429125 |
| TREM1      | 0,014889337 | 0,00392886  | down       | -5,7947106 | -2,5347366 |
| SCARNA14   | 0,006072753 | 1,87E-04    | down       | -5,7369037 | -2,5202723 |
| COL13A1    | 0,008221181 | 0,001131355 | down       | -5,653983  | -2,4992676 |
| DKK3       | 0,010471135 | 0,002082346 | down       | -5,275981  | -2,3994393 |
| AOX1       | 0,006072753 | 2,91E-05    | down       | -4,8752646 | -2,2854805 |
| CYTL1      | 0,046108667 | 0,022332247 | down       | -4,7918663 | -2,2605877 |
| HAS2       | 0,022197437 | 0,007971294 | down       | -4,761364  | -2,251375  |
| MICALCL    | 0,006072753 | 6,23E-05    | down       | -4,393805  | -2,1354709 |
| ADAMTSL2   | 0,035923388 | 0,016023494 | down       | -4,2449026 | -2,0857315 |
| AOX1       | 0,006072753 | 6,70E-05    | down       | -4,2434382 | -2,0852337 |
| LAT2       | 0,006072753 | 1,35E-04    | down       | -4,13918   | -2,049345  |

|                 |             |             |      |            |            |
|-----------------|-------------|-------------|------|------------|------------|
| <b>NTRK3</b>    | 0,010360247 | 0,002029201 | down | -4,1074944 | -2,0382586 |
| <b>DTX2</b>     | 0,033232126 | 0,014329448 | down | -4,0376835 | -2,0135279 |
| <b>SPX</b>      | 0,011645762 | 0,002592095 | down | -4,002425  | -2,0008745 |
| <b>SCARNA20</b> | 0,006782571 | 4,48E-04    | down | -3,7432098 | -1,9042759 |
| <b>SPANXC</b>   | 0,012453955 | 0,003003313 | down | -3,6311977 | -1,8604455 |
| <b>TAS2R46</b>  | 0,019465206 | 0,006286474 | down | -3,6034966 | -1,8493974 |
| <b>SCARNA11</b> | 0,020008743 | 0,006529721 | down | -3,5760891 | -1,8383827 |
| <b>CATSPER1</b> | 0,006782571 | 4,74E-04    | down | -3,566778  | -1,8346214 |
| <b>FLJ38773</b> | 0,030505905 | 0,012594181 | down | -3,5496218 | -1,8276653 |
| <b>BATF2</b>    | 0,006072753 | 1,29E-04    | down | -3,5425966 | -1,8248072 |
| <b>RGS21</b>    | 0,014242152 | 0,003614981 | up   | 184,0419   | 7,5238905  |
| <b>FMO1</b>     | 0,006072753 | 2,71E-04    | up   | 57,964977  | 5,8571095  |
| <b>DNAH2</b>    | 0,006919731 | 6,92E-04    | up   | 57,482327  | 5,8450465  |
| <b>CD33</b>     | 0,006072753 | 2,09E-04    | up   | 54,28184   | 5,762398   |
| <b>CMA1</b>     | 0,021547725 | 0,007564163 | up   | 50,36604   | 5,6543794  |
| <b>VCY</b>      | 0,007443665 | 8,95E-04    | up   | 49,49561   | 5,6292286  |
| <b>ARHGAP9</b>  | 0,0187362   | 0,005969217 | up   | 44,127113  | 5,4635935  |
| <b>DOCK3</b>    | 0,007764121 | 0,00102234  | up   | 33,3437    | 5,0593424  |
| <b>CLEC4M</b>   | 0,007922231 | 0,001059066 | up   | 33,24884   | 5,055232   |

|                  |             |             |    |            |           |
|------------------|-------------|-------------|----|------------|-----------|
| <b>FAM178B</b>   | 0,007148277 | 7,70E-04    | up | 31,698034  | 4,9863214 |
| <b>ITGAM</b>     | 0,006072753 | 1,97E-04    | up | 25,166553  | 4,6534357 |
| <b>MOP-1</b>     | 0,016933363 | 0,004941672 | up | 24,58354   | 4,619621  |
| <b>INO80D</b>    | 0,006072753 | 7,40E-05    | up | 23,891182  | 4,5784063 |
| <b>CASP2</b>     | 0,00740808  | 8,76E-04    | up | 22,834822  | 4,5131636 |
| <b>C20orf197</b> | 0,006072753 | 9,12E-05    | up | 19,070473  | 4,2532687 |
| <b>CDX4</b>      | 0,021849586 | 0,007772965 | up | 18,924606  | 4,2421913 |
| <b>CD1B</b>      | 0,00740808  | 8,71E-04    | up | 18,703062  | 4,2252026 |
| <b>GNG13</b>     | 0,007598146 | 9,63E-04    | up | 18,674265  | 4,2229795 |
| <b>TRIM43</b>    | 0,007764121 | 0,001031146 | up | 17,466057  | 4,126482  |
| <b>BCL2L11</b>   | 0,006782571 | 4,53E-04    | up | 15,7657995 | 3,9787264 |
| <b>ZMAT4</b>     | 0,019465206 | 0,006292814 | up | 15,361171  | 3,9412162 |
| <b>PLAC4</b>     | 0,006919731 | 6,90E-04    | up | 14,548714  | 3,8628197 |
| <b>IDUA</b>      | 0,006072753 | 8,61E-06    | up | 14,345359  | 3,8425121 |
| <b>FAM178B</b>   | 0,00675972  | 4,28E-04    | up | 14,116123  | 3,819272  |
| <b>COL11A2</b>   | 0,012416313 | 0,002977409 | up | 13,479758  | 3,7527227 |

**Supplementary Table 2. Microarray results - RKO- Kaempferol 48h - The most differentially expressed non-coding genes (Top 25 most up/down regulated)**

| GeneSymbol     | p (Corr)    | p           | Regulation | FC         | Log FC   |
|----------------|-------------|-------------|------------|------------|----------|
| LINC01583      | 0.018016826 | 0.005533346 | down       | -7.105507  | -2.82894 |
| LOC102724193   | 0.048313916 | 0.024019763 | down       | -5.7629976 | -2.52682 |
| SNORA30        | 0.018659689 | 0.005836757 | down       | -5.7235985 | -2.51692 |
| WHAMMP3        | 0.02450844  | 0.009411498 | down       | -5.6303387 | -2.49322 |
| MLLT4-AS1      | 0.025271233 | 0.009814821 | down       | -5.2181926 | -2.38355 |
| lnc-EMILIN2-1  | 0.006782571 | 6.15E-04    | down       | -5.0078573 | -2.32419 |
| CLCA3P         | 0.009724351 | 0.001737553 | down       | -4.582848  | -2.19624 |
| lnc-NT5DC1-4   | 0.026683021 | 0.010503016 | down       | -4.163207  | -2.0577  |
| FLJ38576       | 0.045130614 | 0.021648498 | down       | -4.162726  | -2.05753 |
| lnc-AKR1B1-1   | 0.022787007 | 0.00828645  | down       | -4.098347  | -2.03504 |
| XLOC_12_010948 | 0.048241593 | 0.023904495 | down       | -4.0974116 | -2.03471 |
| SNORD9         | 0.014689662 | 0.003837666 | down       | -4.055664  | -2.01994 |
| lnc-IAH1-2     | 0.023802338 | 0.008880383 | down       | -3.8767612 | -1.95485 |
| SNORA79        | 0.027623486 | 0.010993882 | down       | -3.7654014 | -1.9128  |
| lnc-SHH-1      | 0.017477471 | 0.005253167 | down       | -3.7628505 | -1.91183 |
| LOC102800447   | 0.020444367 | 0.006885334 | down       | -3.732654  | -1.9002  |
| lnc-DBT-1      | 0.006743523 | 4.23E-04    | down       | -3.718563  | -1.89475 |
| lnc-COL1A1-4   | 0.023859812 | 0.008948138 | down       | -3.6370137 | -1.86275 |
| lnc-RELT-1     | 0.006345384 | 3.27E-04    | down       | -3.5700226 | -1.83593 |

|                    |             |             |      |            |          |
|--------------------|-------------|-------------|------|------------|----------|
| lnc-AC009365.3.1-1 | 0.02368607  | 0.008826657 | down | -3.5443013 | -1.8255  |
| LINC01204          | 0.006072753 | 4.16E-05    | down | -3.5343244 | -1.82143 |
| lnc-C3orf65-2      | 0.021547725 | 0.00758604  | down | -3.4752212 | -1.7971  |
| TMEM92-AS1         | 0.0187362   | 0.005960597 | down | -3.4705667 | -1.79517 |
| TMEM92-AS1         | 0.02413292  | 0.009130236 | down | -3.4614983 | -1.7914  |
| lnc-OR51B6-1       | 0.006072753 | 1.99E-04    | down | -3.432476  | -1.77925 |
| XLOC_12_010831     | 0.011048292 | 0.002345771 | up   | 175.93254  | 7.458879 |
| LOC101929019       | 0.006072753 | 6.36E-05    | up   | 157.90137  | 7.30288  |
| lnc-PROC-2         | 0.006782571 | 5.96E-04    | up   | 106.38419  | 6.73314  |
| LINC00707          | 0.006072753 | 9.73E-05    | up   | 102.69604  | 6.682237 |
| lnc-KLF3-2         | 0.006782571 | 5.92E-04    | up   | 85.95701   | 6.425543 |
| LOC101928273       | 0.006782571 | 5.16E-04    | up   | 75.716385  | 6.242534 |
| lnc-MBIP-2         | 0.016182011 | 0.004592899 | up   | 75.00083   | 6.228835 |
| LINC00472          | 0.047808886 | 0.023497159 | up   | 56.72619   | 5.825943 |
| LINC00689          | 0.019741029 | 0.006390608 | up   | 44.24582   | 5.467469 |
| LINC01201          | 0.011613181 | 0.002558239 | up   | 43.89887   | 5.456112 |
| lnc-XRCC2-2        | 0.007946287 | 0.001069225 | up   | 37.86802   | 5.242908 |
| lnc-FRMD4B-2       | 0.010583176 | 0.002136054 | up   | 35.8405    | 5.163519 |
| lnc-KCNS3-4        | 0.032128397 | 0.01350263  | up   | 35.603905  | 5.153964 |
| LOC400743          | 0.006072753 | 2.69E-04    | up   | 35.56976   | 5.152579 |
| lnc-NOVA1-1        | 0.006417178 | 3.35E-04    | up   | 32.76794   | 5.034213 |
| LOC102724679       | 0.006782571 | 5.76E-04    | up   | 25.94634   | 4.697459 |

|                |             |             |    |           |          |
|----------------|-------------|-------------|----|-----------|----------|
| Inc-TSHZ2-3    | 0.011666636 | 0.002660543 | up | 25.002253 | 4.643986 |
| LINC00083      | 0.009106663 | 0.001384715 | up | 24.20005  | 4.596938 |
| XLOC_12_009136 | 0.021492854 | 0.007492922 | up | 22.522472 | 4.493293 |
| XLOC_12_015206 | 0.006072753 | 2.84E-04    | up | 21.463818 | 4.423835 |
| LOC389033      | 0.014086007 | 0.003556886 | up | 20.588388 | 4.363759 |
| Inc-SLC44A5-4  | 0.026331674 | 0.010318703 | up | 19.631796 | 4.29512  |
| Inc-OLFM3-1    | 0.006072753 | 1.15E-04    | up | 18.451176 | 4.205641 |
| LINC01405      | 0.006072753 | 1.59E-04    | up | 17.503967 | 4.12961  |
| LOC101929610   | 0.008215214 | 0.001123508 | up | 15.966233 | 3.996952 |

**Supplementary Table 3. Microarray results - RKO-CAPE 48h - The most differentially expressed coding genes (Top 25 most up/down regulated)**

| GeneSymbol      | p (Corr)    | p           | Regulation | FC          | Log FC     |
|-----------------|-------------|-------------|------------|-------------|------------|
| <b>OLAH</b>     | 0,001579187 | 2,46E-05    | down       | -48,92585   | -5,612525  |
| <b>TREM1</b>    | 0,004478552 | 0,001983222 | down       | -42,54717   | -5,410991  |
| <b>ROBO4</b>    | 0,00171886  | 2,59E-04    | down       | -29,56      | -4,8855743 |
| <b>MAP1LC3C</b> | 0,001579187 | 7,63E-05    | down       | -22,148678  | -4,4691486 |
| <b>MFAP2</b>    | 0,00228211  | 6,42E-04    | down       | -17,965387  | -4,167148  |
| <b>CALCA</b>    | 0,001579187 | 7,02E-05    | down       | -16,922834  | -4,0808992 |
| <b>TSLP</b>     | 0,002065109 | 5,14E-04    | down       | -16,76373   | -4,067271  |
| <b>TREM1</b>    | 0,004216177 | 0,001813388 | down       | -14,381349  | -3,846127  |
| <b>AK9</b>      | 0,039669976 | 0,028219627 | down       | -11,569501  | -3,5322547 |
| <b>INSC</b>     | 0,001671252 | 2,25E-04    | down       | -10,8957815 | -3,4456978 |
| <b>SPX</b>      | 0,002276144 | 6,39E-04    | down       | -10,797617  | -3,432641  |
| <b>PRKACB</b>   | 0,008833086 | 0,004985571 | down       | -10,187157  | -3,3486795 |
| <b>KRTAP2-3</b> | 0,001579187 | 3,46E-05    | down       | -9,676649   | -3,2745075 |
| <b>OLAH</b>     | 0,001579187 | 1,01E-04    | down       | -9,187096   | -3,1996088 |
| <b>C8orf46</b>  | 0,002749912 | 8,96E-04    | down       | -9,071577   | -3,1813533 |
| <b>NOS3</b>     | 0,002464793 | 7,40E-04    | down       | -8,98316    | -3,167223  |

|                 |             |             |      |            |            |
|-----------------|-------------|-------------|------|------------|------------|
| <b>MILR1</b>    | 0,01043405  | 0,006097918 | down | -7,4712334 | -2,9013464 |
| <b>AOX1</b>     | 0,001579187 | 1,88E-05    | down | -7,0945992 | -2,8267212 |
| <b>FLJ45513</b> | 0,014579527 | 0,009117846 | down | -6,67614   | -2,7390141 |
| <b>PRKACB</b>   | 0,015966631 | 0,010119983 | down | -6,5985928 | -2,7221584 |
| <b>FRMD4A</b>   | 0,001579187 | 2,51E-05    | down | -6,5961204 | -2,7216177 |
| <b>C1QTNF2</b>  | 0,002816881 | 9,51E-04    | down | -6,522311  | -2,7053833 |
| <b>CDC20B</b>   | 0,03814312  | 0,027023628 | down | -6,348848  | -2,6664948 |
| <b>CAPN15</b>   | 0,001579187 | 7,02E-05    | down | -6,3338957 | -2,663093  |
| <b>XKR6</b>     | 0,001771149 | 3,05E-04    | down | -6,3130727 | -2,6583424 |
| <b>GCNT3</b>    | 0,001579187 | 7,29E-06    | up   | 61,9762    | 5,9536424  |
| <b>AKR1B10</b>  | 0,002493334 | 7,52E-04    | up   | 54,389973  | 5,765269   |
| <b>AKR1B15</b>  | 0,001579187 | 1,26E-04    | up   | 53,18661   | 5,732991   |
| <b>AKR1B10</b>  | 0,001579187 | 6,36E-05    | up   | 42,227005  | 5,400094   |
| <b>TREM2</b>    | 0,001579187 | 4,29E-05    | up   | 39,93845   | 5,3197064  |
| <b>LCE1B</b>    | 0,001579187 | 1,39E-04    | up   | 33,1162    | 5,049465   |
| <b>SMOC2</b>    | 0,00223911  | 6,18E-04    | up   | 32,821648  | 5,036576   |
| <b>NEURL3</b>   | 0,001579187 | 6,16E-06    | up   | 31,269915  | 4,9667034  |
| <b>LCE1C</b>    | 0,001579187 | 1,28E-04    | up   | 31,142782  | 4,960826   |
| <b>SPANXA1</b>  | 0,001579187 | 1,31E-05    | up   | 26,486244  | 4,7271714  |



|                 |             |             |    |           |           |
|-----------------|-------------|-------------|----|-----------|-----------|
| <b>C3</b>       | 0,001579187 | 1,16E-04    | up | 23,706726 | 4,5672245 |
| <b>CCDC30</b>   | 0,001579187 | 1,10E-05    | up | 21,461037 | 4,423648  |
| <b>MCEMP1</b>   | 0,001579187 | 2,64E-05    | up | 21,457747 | 4,4234266 |
| <b>IL7R</b>     | 0,001579187 | 6,14E-05    | up | 21,088312 | 4,3983717 |
| <b>SLC2A9</b>   | 0,006832387 | 0,003581349 | up | 20,580654 | 4,363217  |
| <b>PTPRR</b>    | 0,001693417 | 2,44E-04    | up | 19,944002 | 4,317883  |
| <b>DCDC2C</b>   | 0,001579187 | 1,00E-04    | up | 19,243258 | 4,266281  |
| <b>ENTHD1</b>   | 0,001579187 | 4,19E-06    | up | 18,826683 | 4,234707  |
| <b>HECW2</b>    | 0,002213628 | 6,05E-04    | up | 18,776136 | 4,2308283 |
| <b>ATP6V0D2</b> | 0,001994183 | 4,66E-04    | up | 18,543621 | 4,212851  |
| <b>AKR1B1</b>   | 0,001579187 | 5,16E-05    | up | 18,249523 | 4,189787  |
| <b>ZNF365</b>   | 0,001579187 | 6,86E-05    | up | 18,176962 | 4,184039  |
| <b>SPANXC</b>   | 0,001579187 | 3,66E-05    | up | 17,884104 | 4,160606  |
| <b>SPINK1</b>   | 0,001579187 | 4,15E-05    | up | 16,886505 | 4,077799  |
| <b>HSD3B1</b>   | 0,001579187 | 6,08E-05    | up | 16,552689 | 4,0489936 |

**Supplementary Table 4. Microarray results - RKO- CAPE 48h - The most differentially expressed non-coding genes (Top 25 most up/down regulated)**

| <b>GeneSymbol</b>            | <b>p (Corr)</b> | <b>p</b>    | <b>Regulation</b> | <b>FC</b>  | <b>Log FC</b> |
|------------------------------|-----------------|-------------|-------------------|------------|---------------|
| <b>LINC01583</b>             | 0,001579187     | 1,22E-04    | down              | -81,64033  | -6,35121      |
| <b>lnc-RP11-597K23.2.1-2</b> | 0,001579187     | 1,39E-04    | down              | -41,607433 | -5,3787694    |
| <b>lnc-TRAP1-1</b>           | 0,001579187     | 4,67E-05    | down              | -16,049162 | -4,004426     |
| <b>lnc-UMODL1-1</b>          | 0,002771783     | 9,14E-04    | down              | -12,169933 | -3,6052494    |
| <b>lnc-EXOC4-2</b>           | 0,001579187     | 2,19E-05    | down              | -11,532882 | -3,527681     |
| <b>LINC00571</b>             | 0,001817613     | 3,60E-04    | down              | -9,811036  | -3,2944055    |
| <b>lnc-MAGEE2-1</b>          | 0,001579187     | 2,10E-05    | down              | -8,139501  | -3,0249403    |
| <b>LINC01239</b>             | 0,007205072     | 0,003833325 | down              | -8,108405  | -3,0194182    |
| <b>WHAMMP3</b>               | 0,001579187     | 9,89E-06    | down              | -8,029205  | -3,0052571    |
| <b>lnc-RELT-1</b>            | 0,001669609     | 2,05E-04    | down              | -8,014538  | -3,0026193    |
| <b>LOC102724155</b>          | 0,00565877      | 0,002793672 | down              | -7,862545  | -2,9749963    |
| <b>LOC729291</b>             | 0,006432824     | 0,003299906 | down              | -7,84872   | -2,9724574    |

|                           |             |             |      |            |            |
|---------------------------|-------------|-------------|------|------------|------------|
| <b>LPP-AS2</b>            | 0,001579187 | 1,20E-04    | down | -7,677145  | -2,9405699 |
| <b>LOC101927851</b>       | 0,002065109 | 5,20E-04    | down | -7,268925  | -2,861742  |
| <b>lnc-FARSB-1</b>        | 0,001867481 | 3,83E-04    | down | -7,172267  | -2,8424292 |
| <b>LOC100505921</b>       | 0,003460268 | 0,001341475 | down | -7,080228  | -2,8237958 |
| <b>LOC100506797</b>       | 0,003216045 | 0,001195582 | down | -6,8833194 | -2,7831044 |
| <b>lnc-TOMM20-1</b>       | 0,003388387 | 0,001288217 | down | -6,695801  | -2,7432566 |
| <b>lnc-C14orf118-1</b>    | 0,001910479 | 4,23E-04    | down | -6,1958494 | -2,631302  |
| <b>lnc-GPN2-2</b>         | 0,001579187 | 1,33E-04    | down | -6,1397657 | -2,6181836 |
| <b>SSR4P1</b>             | 0,020353222 | 0,013363872 | down | -6,0038095 | -2,5858781 |
| <b>LOC100130938</b>       | 0,001579187 | 4,99E-05    | down | -5,513946  | -2,4630852 |
| <b>LOC730961</b>          | 0,003840595 | 0,00158508  | down | -5,5118127 | -2,4625268 |
| <b>LOC100128361</b>       | 0,003838185 | 0,001581343 | down | -5,494001  | -2,4578571 |
| <b>UBAC2-AS1</b>          | 0,001579187 | 6,78E-05    | down | -5,426688  | -2,440072  |
| <b>LOC344887</b>          | 0,001579187 | 4,76E-05    | up   | 50,776936  | 5,6661015  |
| <b>lnc-AC110619.2.1-1</b> | 0,001579187 | 5,67E-05    | up   | 39,038704  | 5,2868333  |
| <b>NBEAP1</b>             | 0,001579187 | 3,37E-05    | up   | 32,73886   | 5,0329323  |
| <b>XLOC_l2_007178</b>     | 0,001669609 | 1,99E-04    | up   | 30,64295   | 4,9374833  |
| <b>lnc-RXRA-1</b>         | 0,001579187 | 3,58E-05    | up   | 28,2205    | 4,8186717  |
| <b>LINC01121</b>          | 0,001579187 | 5,29E-05    | up   | 24,546476  | 4,617444   |

|                              |             |             |    |           |           |
|------------------------------|-------------|-------------|----|-----------|-----------|
| <b>XLOC_l2_004840</b>        | 0,001579187 | 5,69E-05    | up | 19,648142 | 4,296321  |
| <b>XLOC_l2_015438</b>        | 0,001579187 | 1,21E-05    | up | 19,137852 | 4,258357  |
| <b>LINC00520</b>             | 0,001579187 | 2,05E-05    | up | 18,394655 | 4,201215  |
| <b>XLOC_l2_000384</b>        | 0,002621528 | 8,27E-04    | up | 17,267761 | 4,110009  |
| <b>XLOC_l2_015438</b>        | 0,003447295 | 0,00132653  | up | 16,454601 | 4,040419  |
| <b>lnc-SMARCAL1-3</b>        | 0,008063408 | 0,004439491 | up | 16,227282 | 4,0203495 |
| <b>lnc-RP11-429E11.3.1-1</b> | 0,001579187 | 3,17E-05    | up | 15,142077 | 3,9204912 |
| <b>lnc-THNSL1-2</b>          | 0,001579187 | 4,59E-05    | up | 14,866286 | 3,8939724 |
| <b>LINC00520</b>             | 0,001579187 | 3,34E-05    | up | 14,547396 | 3,862689  |
| <b>lnc-ASMT-5</b>            | 0,002029816 | 4,94E-04    | up | 14,270984 | 3,835013  |
| <b>lnc-ASMT-2</b>            | 0,001579187 | 9,51E-05    | up | 13,989347 | 3,8062568 |
| <b>lnc-LRRC1-5</b>           | 0,001579187 | 2,00E-05    | up | 13,907864 | 3,797829  |
| <b>MYH16</b>                 | 0,011267884 | 0,00670142  | up | 13,793077 | 3,7858725 |
| <b>LINC01021</b>             | 0,001579187 | 1,01E-04    | up | 13,599826 | 3,7655163 |
| <b>LINC01336</b>             | 0,003938193 | 0,00164318  | up | 12,74844  | 3,6722488 |
| <b>LOC101927501</b>          | 0,001579187 | 7,25E-05    | up | 11,763806 | 3,556283  |
| <b>lnc-FAM54A-1</b>          | 0,001970166 | 4,54E-04    | up | 10,976446 | 3,4563391 |
| <b>lnc-MMRN1-2</b>           | 0,004719967 | 0,002163833 | up | 10,551906 | 3,3994317 |
| <b>LINC01021</b>             | 0,001579187 | 4,72E-05    | up | 9,993973  | 3,3210583 |

**Supplementary Table 5. Microarray results – HCT-116- Kaempferol 48h - The most differentially expressed coding genes (Top 25 most up/down regulated)**

| <b>GeneSymbol</b> | <b>p (Corr)</b> | <b>p</b>    | <b>Regulation</b> | <b>FC</b>  | <b>Log FC</b> |
|-------------------|-----------------|-------------|-------------------|------------|---------------|
| <b>HIST2H2BE</b>  | 0,0473561       | 0,009852014 | down              | -9,692902  | -3,2769287    |
| <b>CNTN1</b>      | 0,02534135      | 1,11E-04    | down              | -6,111282  | -2,611475     |
| <b>ARHGEF10</b>   | 0,026350636     | 0,001500786 | down              | -5,638697  | -2,4953618    |
| <b>GREM1</b>      | 0,03374326      | 0,004088833 | down              | -5,4675674 | -2,4508991    |
| <b>RAET1E</b>     | 0,034570396     | 0,004389699 | down              | -5,4527025 | -2,4469714    |
| <b>ITGAX</b>      | 0,02534135      | 1,06E-04    | down              | -5,243344  | -2,3904872    |
| <b>TMCC2</b>      | 0,02534135      | 9,44E-04    | down              | -5,0222    | -2,3283195    |
| <b>STX1B</b>      | 0,027339293     | 0,002042017 | down              | -4,964615  | -2,3116817    |
| <b>PTGER1</b>     | 0,02534135      | 8,94E-04    | down              | -4,888847  | -2,2894943    |
| <b>IL6R</b>       | 0,02534135      | 7,00E-05    | down              | -4,8078237 | -2,265384     |
| <b>CHD2</b>       | 0,02534135      | 4,60E-04    | down              | -4,7667656 | -2,2530107    |
| <b>SCARNA14</b>   | 0,04319069      | 0,007907829 | down              | -4,7062597 | -2,234581     |
| <b>LCK</b>        | 0,038512416     | 0,005651039 | down              | -4,5386324 | -2,1822577    |
| <b>ELK1</b>       | 0,04638023      | 0,009274415 | down              | -4,406805  | -2,139733     |
| <b>ADAMTS2</b>    | 0,042844616     | 0,007687321 | down              | -4,359727  | -2,1242378    |
| <b>KRT32</b>      | 0,02534135      | 8,81E-04    | down              | -4,2178955 | -2,0765233    |

|                   |             |             |      |            |            |
|-------------------|-------------|-------------|------|------------|------------|
| <b>HYDIN</b>      | 0,02534135  | 3,74E-04    | down | -4,1377115 | -2,0488331 |
| <b>PHTF2</b>      | 0,02534135  | 5,72E-04    | down | -3,9463003 | -1,9805007 |
| <b>LRRC31</b>     | 0,02534135  | 5,99E-04    | down | -3,9136195 | -1,9685035 |
| <b>RPS6KA2</b>    | 0,02534135  | 2,59E-04    | down | -3,723631  | -1,89671   |
| <b>MTHFR</b>      | 0,02534135  | 0,001095554 | down | -3,6464334 | -1,866486  |
| <b>HIST2H2AA4</b> | 0,040738642 | 0,00670543  | down | -3,5894442 | -1,8437604 |
| <b>ACVR1B</b>     | 0,043596003 | 0,008226963 | down | -3,5222814 | -1,8165102 |
| <b>MC5R</b>       | 0,038976867 | 0,005970603 | down | -3,4998796 | -1,8073052 |
| <b>SFXN5</b>      | 0,026531143 | 0,001722049 | down | -3,471963  | -1,7957516 |
| <b>FAHD1</b>      | 0,02534135  | 6,85E-04    | up   | 10,096209  | 3,3357418  |
| <b>KHK</b>        | 0,02534135  | 6,26E-04    | up   | 9,017088   | 3,1726615  |
| <b>ADD2</b>       | 0,03446235  | 0,004254761 | up   | 7,9913845  | 2,9984455  |
| <b>KLHDC1</b>     | 0,031704348 | 0,003602006 | up   | 7,113782   | 2,8306167  |
| <b>SPATA31A3</b>  | 0,030224998 | 0,003225638 | up   | 7,024714   | 2,8124394  |
| <b>PATL2</b>      | 0,03578456  | 0,004810381 | up   | 6,93076    | 2,7930136  |
| <b>SKIDA1</b>     | 0,026844535 | 0,001884781 | up   | 6,913162   | 2,7893457  |
| <b>KLLN</b>       | 0,02534135  | 5,74E-04    | up   | 6,4978914  | 2,6999717  |
| <b>NCOA1</b>      | 0,031793337 | 0,003665247 | up   | 6,3761406  | 2,6726835  |
| <b>MTG1</b>       | 0,02826705  | 0,002488441 | up   | 6,2979255  | 2,6548767  |
| <b>ANKK1</b>      | 0,026350636 | 0,00164972  | up   | 6,0723076  | 2,6022449  |
| <b>MYB</b>        | 0,02534135  | 0,001177893 | up   | 5,9620757  | 2,5758147  |
| <b>SLC38A6</b>    | 0,038691305 | 0,005895361 | up   | 5,9417367  | 2,5708847  |
| <b>MUC20</b>      | 0,02534135  | 0,00105895  | up   | 5,6228714  | 2,491307   |

|               |             |             |    |           |           |
|---------------|-------------|-------------|----|-----------|-----------|
| <b>CTSW</b>   | 0,031704348 | 0,003601497 | up | 5,560731  | 2,4752746 |
| <b>PPEF1</b>  | 0,042810224 | 0,007532851 | up | 5,443643  | 2,4445724 |
| <b>ALB</b>    | 0,04319069  | 0,007925092 | up | 5,4255567 | 2,4397712 |
| <b>CFAP44</b> | 0,027993366 | 0,002360695 | up | 5,406207  | 2,4346168 |
| <b>KCNH8</b>  | 0,02534135  | 9,67E-05    | up | 5,370005  | 2,4249234 |
| <b>EDN1</b>   | 0,02534135  | 4,95E-04    | up | 5,2672567 | 2,3970518 |
| <b>WDR78</b>  | 0,026844535 | 0,001855046 | up | 5,2577324 | 2,3944407 |
| <b>PIGM</b>   | 0,02534135  | 7,47E-05    | up | 5,238993  | 2,3892896 |
| <b>ZNF91</b>  | 0,043085422 | 0,007808268 | up | 5,1885514 | 2,3753319 |
| <b>BCL2</b>   | 0,027699148 | 0,002242541 | up | 5,074681  | 2,343317  |
| <b>ZNF107</b> | 0,043242373 | 0,007971325 | up | 5,066422  | 2,3409672 |

**Supplementary Table 6. Microarray results – HCT-116- Kaempferol 48h - The most differentially expressed non-coding genes (Top 25 most up/down regulated)**

| GeneSymbol          | p (Corr)    | p           | Regulation | FC         | Log FC     |
|---------------------|-------------|-------------|------------|------------|------------|
| <b>Inc-KIF16B-1</b> | 0,036473084 | 0,005009757 | down       | -12,701839 | -3,6669655 |
| <b>Inc-LRRC4C-4</b> | 0,02534135  | 0,0010485   | down       | -11,648635 | -3,542089  |
| <b>FRMPD3-AS1</b>   | 0,02534135  | 8,90E-04    | down       | -10,439921 | -3,384039  |
| <b>Inc-SUSD1-2</b>  | 0,029763326 | 0,003025592 | down       | -8,530532  | -3,0926356 |
| <b>Inc-TMOD3-1</b>  | 0,028288204 | 0,002515368 | down       | -7,6161275 | -2,9290576 |
| <b>LOC100422737</b> | 0,028990543 | 0,002730275 | down       | -6,5572433 | -2,7130895 |
| <b>Inc-AEBP2-2</b>  | 0,02756683  | 0,002205928 | down       | -6,2201014 | -2,636938  |
| <b>Inc-NFE2L2-1</b> | 0,02534135  | 6,56E-05    | down       | -5,8385954 | -2,5456214 |



|                       |             |             |      |            |            |
|-----------------------|-------------|-------------|------|------------|------------|
| <b>LOC100506860</b>   | 0,02534135  | 4,87E-04    | down | -5,5801864 | -2,4803133 |
| <b>Inc-SMUG1-6</b>    | 0,026350636 | 0,001654536 | down | -5,4269476 | -2,440141  |
| <b>LOC101928576</b>   | 0,027339293 | 0,002015736 | down | -5,1418185 | -2,3622787 |
| <b>XLOC_I2_014827</b> | 0,047236465 | 0,009688539 | down | -4,7879767 | -2,259416  |
| <b>Inc-VGLL3-3</b>    | 0,02534135  | 0,001112861 | down | -4,6565504 | -2,2192616 |
| <b>Inc-ARL6IP5-1</b>  | 0,026350636 | 0,001587701 | down | -4,6174555 | -2,207098  |
| <b>NHS-AS1</b>        | 0,033065885 | 0,003930883 | down | -4,4334636 | -2,1484342 |
| <b>MIR940</b>         | 0,038512416 | 0,005727714 | down | -4,412425  | -2,1415718 |
| <b>Inc-TERF1-1</b>    | 0,036155473 | 0,004949406 | down | -4,3317685 | -2,1149561 |
| <b>Inc-KIAA1919-1</b> | 0,02534135  | 1,06E-04    | down | -4,310634  | -2,1079001 |
| <b>Inc-ACTR6-1</b>    | 0,027991772 | 0,002308853 | down | -4,010431  | -2,0037572 |
| <b>LOC101928295</b>   | 0,026195675 | 0,00133282  | down | -4,005567  | -2,0020065 |
| <b>Inc-CETP-1</b>     | 0,02534135  | 1,66E-04    | down | -3,9816654 | -1,993372  |
| <b>Inc-C6orf89-1</b>  | 0,04231574  | 0,007263483 | down | -3,9261646 | -1,9731207 |
| <b>MIR181A1HG</b>     | 0,026350636 | 0,001675163 | down | -3,8974864 | -1,962544  |
| <b>Inc-CETP-1</b>     | 0,04139119  | 0,006893679 | down | -3,8822525 | -1,9568939 |
| <b>Inc-C17orf97-1</b> | 0,02534135  | 1,64E-04    | down | -3,8378112 | -1,9402838 |
| <b>LOC100130417</b>   | 0,02534135  | 5,93E-05    | up   | 10,783989  | 3,430819   |
| <b>LINC00476</b>      | 0,025656443 | 0,001222437 | up   | 9,052451   | 3,1783085  |

|                            |             |                 |    |           |           |
|----------------------------|-------------|-----------------|----|-----------|-----------|
| <b>LINC01252</b>           | 0,02534135  | 3,00E-05        | up | 8,371915  | 3,0655577 |
| <b>LOC255187</b>           | 0,042789795 | 0,00741258<br>3 | up | 7,665128  | 2,93831   |
| <b>LOC100506797</b>        | 0,02534135  | 2,76E-04        | up | 7,2739396 | 2,862737  |
| <b>XLOC_I2_00070<br/>6</b> | 0,043318804 | 0,00802249<br>2 | up | 6,8182955 | 2,769411  |
| <b>Inc-QRSL1-1</b>         | 0,02534135  | 8,77E-04        | up | 6,7427826 | 2,753344  |
| <b>Inc-C1orf180-1</b>      | 0,031793337 | 0,00363028<br>6 | up | 6,6681786 | 2,7372928 |
| <b>LOC101927604</b>        | 0,02534135  | 1,71E-04        | up | 6,194266  | 2,6309333 |
| <b>XLOC_I2_00822<br/>1</b> | 0,026270093 | 0,00145960<br>7 | up | 6,1303973 | 2,6159806 |
| <b>Inc-CNN1-2</b>          | 0,029763326 | 0,00301410<br>1 | up | 6,089238  | 2,6062617 |
| <b>C8orf37-AS1</b>         | 0,02534135  | 1,62E-04        | up | 6,0594893 | 2,5991962 |
| <b>MGC39584</b>            | 0,036155473 | 0,00493480<br>2 | up | 5,9271703 | 2,5673435 |
| <b>FLJ21408</b>            | 0,026195675 | 0,00135771<br>3 | up | 5,856481  | 2,550034  |
| <b>LOC284561</b>           | 0,030017074 | 0,00314329<br>2 | up | 5,853198  | 2,549225  |
| <b>CETN4P</b>              | 0,035389025 | 0,00473015<br>5 | up | 5,651288  | 2,4985797 |
| <b>Inc-CRYGS-1</b>         | 0,04563223  | 0,00904458<br>7 | up | 5,5431533 | 2,470707  |
| <b>LINC00704</b>           | 0,031793337 | 0,00365588      | up | 5,464017  | 2,449962  |
| <b>METTL21EP</b>           | 0,0352537   | 0,00463832      | up | 5,4603367 | 2,4489899 |
| <b>Inc-RALGDS-2</b>        | 0,026350636 | 0,00162926<br>4 | up | 5,44006   | 2,4436226 |
| <b>LOC100996654</b>        | 0,029036827 | 0,00280614<br>4 | up | 5,189706  | 2,3756528 |

|                     |             |                 |    |           |           |
|---------------------|-------------|-----------------|----|-----------|-----------|
| <b>LOC100507053</b> | 0,030671496 | 0,00334980<br>6 | up | 5,089075  | 2,3474035 |
| <b>Inc-WDR27-1</b>  | 0,04839221  | 0,01033206<br>8 | up | 5,0235276 | 2,3287008 |
| <b>LOC101929566</b> | 0,032026086 | 0,00370729<br>7 | up | 5,002261  | 2,3225803 |
| <b>PAQR9-AS1</b>    | 0,03277476  | 0,00384466<br>5 | up | 4,9562745 | 2,309256  |

**Supplementary Table 7. Microarray results – HCT-116- CAPE 48h - The most differentially expressed coding genes (Top 25 most up/down regulated)**

| <b>GeneSymbol</b> | <b>p (Corr)</b> | <b>p</b>    | <b>Regulation</b> | <b>FC</b>  | <b>Log FC</b> |
|-------------------|-----------------|-------------|-------------------|------------|---------------|
| <b>CRYBA1</b>     | 0,041469093     | 0,002424924 | down              | -4,676512  | -2,2254329    |
| <b>CELF4</b>      | 0,025024382     | 8,45E-05    | down              | -3,871132  | -1,9527555    |
| <b>MIR146A</b>    | 0,025024382     | 1,20E-04    | down              | -2,8968015 | -1,5344608    |
| <b>SIM2</b>       | 0,025024382     | 1,39E-04    | down              | -2,7410722 | -1,4547403    |
| <b>SENP6</b>      | 0,025024382     | 2,17E-04    | down              | -2,6717834 | -1,417803     |
| <b>ZNF540</b>     | 0,04196386      | 0,002562449 | down              | -2,4289608 | -1,2803392    |
| <b>STS</b>        | 0,03615443      | 0,001661115 | down              | -2,377853  | -1,2496594    |
| <b>CDX4</b>       | 0,03690205      | 0,001778587 | down              | -2,375038  | -1,2479506    |
| <b>NCF1</b>       | 0,043939844     | 0,003058813 | down              | -2,3330684 | -1,2222285    |
| <b>KIF26B</b>     | 0,025039753     | 4,85E-04    | down              | -2,2708411 | -1,1832267    |
| <b>KRTAP11-1</b>  | 0,032878034     | 0,001270262 | down              | -2,260814  | -1,1768422    |
| <b>RTP4</b>       | 0,02689703      | 6,11E-04    | down              | -2,2553782 | -1,1733694    |
| <b>LCE2A</b>      | 0,027882278     | 8,27E-04    | down              | -2,2428772 | -1,1653507    |
| <b>KCNB1</b>      | 0,04196386      | 0,002657949 | down              | -2,2100692 | -1,1440915    |
| <b>SSPN</b>       | 0,03886568      | 0,001961547 | down              | -2,1904836 | -1,1312494    |
| <b>KCNH8</b>      | 0,035935942     | 0,0015526   | down              | -2,0249922 | -1,0179163    |
| <b>KRIT1</b>      | 0,028212637     | 8,74E-04    | down              | -2,0235615 | -1,0168967    |
| <b>FAM154A</b>    | 0,04196386      | 0,002743959 | down              | -2,0138402 | -1,0099492    |

|                  |             |             |    |           |           |
|------------------|-------------|-------------|----|-----------|-----------|
| <b>TSPAN32</b>   | 0,027882278 | 7,75E-04    | up | 8,239051  | 3,042478  |
| <b>PCDH11X</b>   | 0,04196386  | 0,002586591 | up | 5,530422  | 2,4673896 |
| <b>RBFOX1</b>    | 0,032376867 | 0,001185194 | up | 5,4777694 | 2,4535885 |
| <b>PDXK</b>      | 0,027882278 | 8,39E-04    | up | 4,907237  | 2,294911  |
| <b>TDGF1</b>     | 0,025024382 | 4,10E-05    | up | 4,438356  | 2,1500254 |
| <b>CER1</b>      | 0,02689703  | 6,06E-04    | up | 4,3535604 | 2,1221957 |
| <b>LRRC55</b>    | 0,027882278 | 6,88E-04    | up | 4,177579  | 2,0626671 |
| <b>KALRN</b>     | 0,04469888  | 0,003169128 | up | 4,176717  | 2,0623693 |
| <b>SPACA5</b>    | 0,025024382 | 2,63E-04    | up | 4,0076423 | 2,0027537 |
| <b>COL20A1</b>   | 0,043175235 | 0,002963651 | up | 3,9427292 | 1,9791946 |
| <b>SCN5A</b>     | 0,035634052 | 0,001518388 | up | 3,7770345 | 1,917254  |
| <b>LOC391322</b> | 0,041469093 | 0,002373308 | up | 3,6590219 | 1,871458  |
| <b>OR5H6</b>     | 0,03690205  | 0,001782136 | up | 3,6346679 | 1,8618236 |
| <b>SLC10A7</b>   | 0,039910782 | 0,002070655 | up | 3,3734539 | 1,7542264 |
| <b>GPT</b>       | 0,045158517 | 0,00336481  | up | 3,3220308 | 1,7320654 |
| <b>ITGAX</b>     | 0,027882278 | 7,88E-04    | up | 2,9871254 | 1,5787578 |
| <b>NPR1</b>      | 0,025039753 | 5,01E-04    | up | 2,9327424 | 1,5522503 |
| <b>DKK4</b>      | 0,025024382 | 4,01E-04    | up | 2,840456  | 1,5061226 |
| <b>GRIP1</b>     | 0,047153924 | 0,003660051 | up | 2,6784513 | 1,421399  |
| <b>NR1I3</b>     | 0,03690205  | 0,001765503 | up | 2,637651  | 1,3992536 |
| <b>SLC26A10</b>  | 0,048030436 | 0,003809124 | up | 2,6119566 | 1,3851309 |
| <b>SPDYE1</b>    | 0,025024382 | 2,19E-04    | up | 2,5971024 | 1,3769029 |
| <b>HSF4</b>      | 0,025039753 | 4,36E-04    | up | 2,5785074 | 1,3665361 |

|              |             |            |    |           |           |
|--------------|-------------|------------|----|-----------|-----------|
| <b>TDRD1</b> | 0,041469093 | 0,00233759 | up | 2,5728827 | 1,3633857 |
| <b>SCX</b>   | 0,028677521 | 9,18E-04   | up | 2,532275  | 1,3404341 |

**Supplementary Table 8. Microarray results – HCT-116- CAPE 48h - The most differentially expressed non-coding genes (Top 25 most up/down regulated)**

| GeneSymbol            | p (Corr)    | p           | Regulation | FC       | Log FC   |
|-----------------------|-------------|-------------|------------|----------|----------|
| <b>lnc-KIF16B-1</b>   | 0.03615443  | 0.001652193 | down       | -14.3639 | -3.84437 |
| <b>lnc-LRRC4C-4</b>   | 0.028904736 | 9.87E-04    | down       | -11.6881 | -3.54697 |
| <b>FRMPD3-AS1</b>     | 0.027882278 | 8.44E-04    | down       | -10.6187 | -3.40853 |
| <b>lnc-AVEN-1</b>     | 0.028904736 | 9.57E-04    | down       | -9.70665 | -3.27897 |
| <b>LINC00310</b>      | 0.025024382 | 3.32E-04    | down       | -8.58656 | -3.10208 |
| <b>LOC100422737</b>   | 0.04196386  | 0.002682922 | down       | -6.48938 | -2.69808 |
| <b>XLOC_l2_001810</b> | 0.025024382 | 3.50E-05    | down       | -4.34525 | -2.11944 |
| <b>lnc-KLF3-2</b>     | 0.04196386  | 0.002688817 | down       | -3.54567 | -1.82606 |
| <b>lnc-ZBED1-1</b>    | 0.027882278 | 8.27E-04    | down       | -3.43828 | -1.78169 |
| <b>C8orf37-AS1</b>    | 0.039910782 | 0.002070902 | down       | -3.39386 | -1.76293 |
| <b>lnc-CHADL-2</b>    | 0.02750665  | 6.41E-04    | down       | -3.37283 | -1.75396 |
| <b>lnc-PFKP-11</b>    | 0.041469093 | 0.002370075 | down       | -3.19769 | -1.67703 |
| <b>lnc-DDX20-2</b>    | 0.029602015 | 0.001050959 | down       | -3.11532 | -1.63938 |
| <b>XLOC_l2_013458</b> | 0.025791103 | 5.30E-04    | down       | -2.99443 | -1.58228 |
| <b>lnc-MIER3-2</b>    | 0.039910782 | 0.00208954  | down       | -2.97687 | -1.5738  |
| <b>lnc-PALLD-2</b>    | 0.043175235 | 0.002978768 | down       | -2.89273 | -1.53243 |
| <b>lnc-ZNF382-1</b>   | 0.029416146 | 0.001034121 | down       | -2.77981 | -1.47499 |
| <b>lnc-IDS-1</b>      | 0.025024382 | 3.17E-04    | down       | -2.70925 | -1.4379  |

|                            |             |             |      |          |          |
|----------------------------|-------------|-------------|------|----------|----------|
| <b>lnc-JMJD7-PLA2G4B-2</b> | 0.04196386  | 0.002788581 | down | -2.69198 | -1.42867 |
| <b>lnc-PTPN3-2</b>         | 0.04196386  | 0.002560628 | down | -2.39741 | -1.26148 |
| <b>lnc-KCNS3-4</b>         | 0.04196386  | 0.002787873 | down | -2.32447 | -1.2169  |
| <b>lnc-RGL4-4</b>          | 0.027882278 | 7.04E-04    | down | -2.31995 | -1.2141  |
| <b>lnc-C20orf96-3</b>      | 0.03690205  | 0.001785376 | down | -2.28124 | -1.18982 |
| <b>lnc-HIATL1-5</b>        | 0.027882278 | 7.92E-04    | down | -2.25934 | -1.1759  |
| <b>LOC101929608</b>        | 0.044761326 | 0.003237362 | down | -2.15019 | -1.10446 |
| <b>MGC39584</b>            | 0.041469093 | 0.002313782 | up   | 7.465664 | 2.900271 |
| <b>lnc-MYO10-3</b>         | 0.04196386  | 0.002790369 | up   | 7.085887 | 2.824948 |
| <b>lnc-RASGRP3-5</b>       | 0.025024382 | 2.09E-04    | up   | 6.352732 | 2.667377 |
| <b>XLOC_l2_009887</b>      | 0.025024382 | 1.52E-04    | up   | 6.26048  | 2.646273 |
| <b>METTTL21EP</b>          | 0.025024382 | 8.68E-05    | up   | 4.646752 | 2.216223 |
| <b>lnc-IVNS1ABP-2</b>      | 0.028306723 | 8.97E-04    | up   | 4.423007 | 2.145027 |
| <b>lnc-TRIML1-3</b>        | 0.025024382 | 6.45E-05    | up   | 4.401312 | 2.137934 |
| <b>DCTN1-AS1</b>           | 0.025024382 | 4.62E-05    | up   | 4.390824 | 2.134492 |
| <b>lnc-CAST-2</b>          | 0.041469093 | 0.002400197 | up   | 4.296413 | 2.103133 |
| <b>lnc-MYB-4</b>           | 0.032376867 | 0.001197375 | up   | 4.274825 | 2.095865 |
| <b>lnc-CNN1-2</b>          | 0.025024382 | 2.55E-04    | up   | 3.995336 | 1.998317 |
| <b>lnc-CCDC140-5</b>       | 0.048030436 | 0.003811674 | up   | 3.976171 | 1.99138  |
| <b>lnc-SDSL-1</b>          | 0.025024382 | 1.64E-04    | up   | 3.685256 | 1.881765 |
| <b>lnc-CX3CR1-2</b>        | 0.025024382 | 6.86E-05    | up   | 3.631042 | 1.860384 |
| <b>lnc-LSR-1</b>           | 0.039799664 | 0.002036391 | up   | 3.500425 | 1.80753  |



|                       |             |             |    |          |          |
|-----------------------|-------------|-------------|----|----------|----------|
| <b>LOC102724193</b>   | 0.025024382 | 3.75E-04    | up | 3.401646 | 1.766233 |
| <b>lnc-API5-4</b>     | 0.037654188 | 0.001861084 | up | 3.342033 | 1.740726 |
| <b>XLOC_l2_008409</b> | 0.025024382 | 2.53E-04    | up | 3.317344 | 1.730029 |
| <b>LOC100506368</b>   | 0.025024382 | 1.13E-04    | up | 3.2161   | 1.685312 |
| <b>LINC01252</b>      | 0.042335887 | 0.002871973 | up | 3.174506 | 1.666532 |
| <b>XLOC_l2_000384</b> | 0.025024382 | 9.76E-05    | up | 3.149525 | 1.655134 |
| <b>LOC100507065</b>   | 0.044761326 | 0.003251269 | up | 3.0921   | 1.628587 |
| <b>LOC101928058</b>   | 0.04196386  | 0.002804407 | up | 2.963253 | 1.567182 |
| <b>lnc-LRRC58-1</b>   | 0.033768304 | 0.00137518  | up | 2.956415 | 1.563849 |
| <b>C16orf86</b>       | 0.025024382 | 3.22E-04    | up | 2.940117 | 1.555873 |
