# Supplementary material for: Inhibitory Effect of CAPE and Kaempferol in Colon Cancer Cell Lines—Possible Implications in New Therapeutic Strategies
Source: MDPI journal article supplement (doi:10.3390/ijms20051199), 2019-03-09
Supplement: s1 [file Supplementary Table 9.xlsx]

## Sheet: Toate probele
Sample	Locus	Genotype	Ref	Observed Allele	Type	Genes	Location	Length	Variant ID	% Frequency	Strand	Exon	Transcript	Coding	Amino Acid Change	Variant Effect	clinvar		PhyloP	SIFT	Grantham	PolyPhen	FATHMM	PFAM	dbSNP	DGV	MAF	EMAF	AMAF	GMAF	UCSC Common SNPs	ExAC LAF	ExAC EAAF	ExAC OAF	ExAC EFAF	ExAC SAAF	ExAC ENFAF	ExAC AAF	ExAC GAF	COSMIC	OMIM	Gene Ontology	DRA	DrugBank	ClinVar	Allele Coverage	Allele Ratio	p-value	Phred QUAL Score
RKO Control	chr3:178917005	A/G	A	G	SNV	PIK3CA	PIK3CA : intronic : NM_006218.3	1		47.28	+		NM_006218.3	c.352+40A>G					0.78					PI3-kinase family, p85-binding domain,PI3-kinase family, ras-binding domain,Phosphatidylinositol 3- and 4-kinase,Phosphoinositide 3-kinase C2,Phosphoinositide 3-kinase family, accessory domain (PIK domain)	rs3729674		0.273	0.1894	0.4163	0.2595	YES	2.088E-1 (pos.178917005)	1.025E-1 (pos.178917005)	2.111E-1 (pos.178917005)	1.629E-1 (pos.178917005)	2.48E-1 (pos.178917005)	2.006E-1 (pos.178917005)	4.305E-1 (pos.178917005)	2.156E-1 (pos.178917005)		Phosphatidylinositol 3-kinase, catalytic, alpha polypeptide	1-phosphatidylinositol-3-kinase activity,1-phosphatidylinositol-4-phosphate 3-kinase activity,ATP binding,ERBB2 signaling pathway,Fc-epsilon receptor signaling pathway,Fc-gamma receptor signaling pathway involved in phagocytosis,T cell costimulation,T cell receptor signaling pathway,activation of protein kinase activity,adipose tissue development,angiogenesis,cardiac muscle contraction,cellular r…	Adenocarcinoma;Adnexal Diseases;Autoimmune Diseases;Breast Diseases;Breast Neoplasms;Bronchial Neoplasms;Carcinoma;Carcinoma, Adenoid Cystic;Carcinoma, Bronchogenic;Carcinoma, Hepatocellular;Carcinoma, Non-Small-Cell Lung;Carcinoma, Renal Cell;Carcinoma, Squamous Cell;Colonic Diseases;Colorectal Neoplasms;Colorectal Neoplasms, Hereditary Nonpolyposis;Congenital Abnormalities;Congenital, Hereditar…	(1S,6BR,9AS,11R,11BR)-9A,11B-DIMETHYL-1-(METHYLOXY)METHYL-3,6,9-TRIOXO-1,6,6B,7,8,9,9A,10,11,11B-DECAHYDRO-3H-FURO4,3,2-DEINDENO4,5-H2BENZOPYRAN-11-YL ACETATE,Caffeine,XL147,XL765		A=552, G=495	A=0.5272, G=0.4728	1e-05	5328.62
	chr3:178927410	A/G	A	G	SNV	PIK3CA	PIK3CA : exonic : NM_006218.3	1	COSM328028	52.15	+	7	NM_006218.3	c.1173A>G	p.Ile391Met	missense	benign		1.3		10	0.011	0.562	PI3-kinase family, p85-binding domain,PI3-kinase family, ras-binding domain,Phosphatidylinositol 3- and 4-kinase,Phosphoinositide 3-kinase C2,Phosphoinositide 3-kinase family, accessory domain (PIK domain)	rs2230461		0.088	0.068	0.2009	0.1096	YES	5.045E-2 (pos.178927410)	0.0 (pos.178927410)	6.333E-2 (pos.178927410)	2.42E-2 (pos.178927410)	1.811E-2 (pos.178927410)	7.024E-2 (pos.178927410)	2.089E-1 (pos.178927410)	6.488E-2 (pos.178927410)	NS,plasma_cell_myeloma	Phosphatidylinositol 3-kinase, catalytic, alpha polypeptide	1-phosphatidylinositol-3-kinase activity,1-phosphatidylinositol-4-phosphate 3-kinase activity,ATP binding,ERBB2 signaling pathway,Fc-epsilon receptor signaling pathway,Fc-gamma receptor signaling pathway involved in phagocytosis,T cell costimulation,T cell receptor signaling pathway,activation of protein kinase activity,adipose tissue development,angiogenesis,cardiac muscle contraction,cellular r…	Adenocarcinoma;Adnexal Diseases;Autoimmune Diseases;Breast Diseases;Breast Neoplasms;Bronchial Neoplasms;Carcinoma;Carcinoma, Adenoid Cystic;Carcinoma, Bronchogenic;Carcinoma, Hepatocellular;Carcinoma, Non-Small-Cell Lung;Carcinoma, Renal Cell;Carcinoma, Squamous Cell;Colonic Diseases;Colorectal Neoplasms;Colorectal Neoplasms, Hereditary Nonpolyposis;Congenital Abnormalities;Congenital, Hereditar…	(1S,6BR,9AS,11R,11BR)-9A,11B-DIMETHYL-1-(METHYLOXY)METHYL-3,6,9-TRIOXO-1,6,6B,7,8,9,9A,10,11,11B-DECAHYDRO-3H-FURO4,3,2-DEINDENO4,5-H2BENZOPYRAN-11-YL ACETATE,Caffeine,XL147,XL765	Benign	A=957, G=1043	A=0.4785, G=0.5215	1e-05	11812.4
	chr3:178952085	A/G	A	G,T	SNV	PIK3CA	PIK3CA : exonic : NM_006218.3	1	COSM775	G=48.50, T=0.05	+	21	NM_006218.3	c.3140A>G	p.His1047Arg	missense	pathogenic		8.86		29	0.639	Pathogenic	PI3-kinase family, p85-binding domain,PI3-kinase family, ras-binding domain,Phosphatidylinositol 3- and 4-kinase,Phosphoinositide 3-kinase C2,Phosphoinositide 3-kinase family, accessory domain (PIK domain)	rs121913279							0.0;0.0 (pos.178952085)	0.0;0.0 (pos.178952085)	0.0;0.0 (pos.178952085)	0.0;0.0 (pos.178952085)	0.0;0.0 (pos.178952085)	1.505E-5;1.505E-5 (pos.178952085)	0.0;0.0 (pos.178952085)	8.317E-6;8.317E-6 (pos.178952085)	Brenner_tumour,CLOVES_syndrome,ER-HER-positive_carcinoma,ER-PR-HER-positive_carcinoma,ER-PR-positive_carcinoma,ER-positive_carcinoma,HER-positive_carcinoma,Hurthle_cell_carcinoma,Merkel_cell_carcinoma,NS,SHH_subtype,acinic_cell_carcinoma,adenocarcinoma,adenoid_cystic_carcinoma,adenoma,alveolar,anaplastic_carcinoma,astrocytoma_Grade_III,astrocytoma_Grade_IV,atypical,basal_(triple-negative)_carcino…	Phosphatidylinositol 3-kinase, catalytic, alpha polypeptide	1-phosphatidylinositol-3-kinase activity,1-phosphatidylinositol-4-phosphate 3-kinase activity,ATP binding,ERBB2 signaling pathway,Fc-epsilon receptor signaling pathway,Fc-gamma receptor signaling pathway involved in phagocytosis,T cell costimulation,T cell receptor signaling pathway,activation of protein kinase activity,adipose tissue development,angiogenesis,cardiac muscle contraction,cellular r…	Adenocarcinoma;Adnexal Diseases;Autoimmune Diseases;Breast Diseases;Breast Neoplasms;Bronchial Neoplasms;Carcinoma;Carcinoma, Adenoid Cystic;Carcinoma, Bronchogenic;Carcinoma, Hepatocellular;Carcinoma, Non-Small-Cell Lung;Carcinoma, Renal Cell;Carcinoma, Squamous Cell;Colonic Diseases;Colorectal Neoplasms;Colorectal Neoplasms, Hereditary Nonpolyposis;Congenital Abnormalities;Congenital, Hereditar…	(1S,6BR,9AS,11R,11BR)-9A,11B-DIMETHYL-1-(METHYLOXY)METHYL-3,6,9-TRIOXO-1,6,6B,7,8,9,9A,10,11,11B-DECAHYDRO-3H-FURO4,3,2-DEINDENO4,5-H2BENZOPYRAN-11-YL ACETATE,Caffeine,XL147,XL765	Likely pathogenic,Pathogenic,other	A=1029, G=970, T=1	A=0.5145, G=0.485, T=5.0E-4	1e-05	13462.6
	chr3:178952141	G/A	G	A	SNV	PIK3CA	PIK3CA : exonic : NM_006218.3	1	COSM6941468	3.52	+	21	NM_006218.3	c.3196G>A	p.Ala1066Thr	missense			7.4		58	0.141	Pathogenic	PI3-kinase family, p85-binding domain,PI3-kinase family, ras-binding domain,Phosphatidylinositol 3- and 4-kinase,Phosphoinositide 3-kinase C2,Phosphoinositide 3-kinase family, accessory domain (PIK domain)																luminal_NS_carcinoma,squamous_cell_carcinoma	Phosphatidylinositol 3-kinase, catalytic, alpha polypeptide	1-phosphatidylinositol-3-kinase activity,1-phosphatidylinositol-4-phosphate 3-kinase activity,ATP binding,ERBB2 signaling pathway,Fc-epsilon receptor signaling pathway,Fc-gamma receptor signaling pathway involved in phagocytosis,T cell costimulation,T cell receptor signaling pathway,activation of protein kinase activity,adipose tissue development,angiogenesis,cardiac muscle contraction,cellular r…	Adenocarcinoma;Adnexal Diseases;Autoimmune Diseases;Breast Diseases;Breast Neoplasms;Bronchial Neoplasms;Carcinoma;Carcinoma, Adenoid Cystic;Carcinoma, Bronchogenic;Carcinoma, Hepatocellular;Carcinoma, Non-Small-Cell Lung;Carcinoma, Renal Cell;Carcinoma, Squamous Cell;Colonic Diseases;Colorectal Neoplasms;Colorectal Neoplasms, Hereditary Nonpolyposis;Congenital Abnormalities;Congenital, Hereditar…	(1S,6BR,9AS,11R,11BR)-9A,11B-DIMETHYL-1-(METHYLOXY)METHYL-3,6,9-TRIOXO-1,6,6B,7,8,9,9A,10,11,11B-DECAHYDRO-3H-FURO4,3,2-DEINDENO4,5-H2BENZOPYRAN-11-YL ACETATE,Caffeine,XL147,XL765		G=1891, A=69	G=0.9648, A=0.0352	1e-05	53.1163
	chr4:55597458	A/G	A	G	SNV	KIT	KIT : intronic : NM_000222.2	1		47.7	+		NM_000222.2	c.2142-36A>G			benign		-0.32					Immunoglobulin I-set domain,Immunoglobulin domain,Protein kinase domain,Protein tyrosine kinase	rs17084713		0.026	0.0003	0.0801	0.0274		4.964E-3 (pos.55597458)	0.0 (pos.55597458)	3.348E-3 (pos.55597458)	0.0 (pos.55597458)	0.0 (pos.55597458)	4.384E-4 (pos.55597458)	8.071E-2 (pos.55597458)	7.655E-3 (pos.55597458)		Hardy-Zuckerman 4 feline sarcoma (v-kit) oncogene	ATP binding,Fc receptor signaling pathway,Kit signaling pathway,MAPK cascade,Ras guanyl-nucleotide exchange factor activity,T cell differentiation,acrosomal vesicle,actin cytoskeleton reorganization,activation of MAPK activity,cell chemotaxis,cell-cell junction,cellular response to thyroid hormone stimulus,cytokine binding,cytokine-mediated signaling pathway,cytoplasmic side of plasma membrane,de…	Albinism;Amino Acid Metabolism, Inborn Errors;Breast Diseases;Breast Neoplasms;Bronchial Neoplasms;Carcinoma, Bronchogenic;Carcinoma, Non-Small-Cell Lung;Congenital, Hereditary, and Neonatal Diseases and Abnormalities;Digestive System Diseases;Digestive System Neoplasms;Endocrine Gland Neoplasms;Endocrine System Diseases;Eye Diseases, Hereditary;Gastrointestinal Diseases;Gastrointestinal Neoplasm…	ABT-869,Dasatinib,Imatinib,Lenvatinib,MP470,Nilotinib,OSI-930,Pazopanib,Phosphonotyrosine,Ponatinib,Regorafenib,Sorafenib,Sunitinib,XL184,XL820	Benign	A=1045, G=953	A=0.523, G=0.477	1e-05	10297.2
	chr4:55972974	T/A	T	A	SNV	KDR	KDR : exonic : NM_002253.2	1	COSM149673	47.38	-	11	NM_002253.2	c.1416A>T	p.Gln472His	missense			-0.05	0.03	24	0.003	neutral	CD80-like C2-set immunoglobulin domain,Immunoglobulin I-set domain,Immunoglobulin V-set domain,Immunoglobulin domain,Protein kinase domain,Protein tyrosine kinase	rs1870377		0.212	0.2369	0.1101	0.1939	YES	9.352E-2 (pos.55972974)	4.637E-1 (pos.55972974)	2.307E-1 (pos.55972974)	2.857E-1 (pos.55972974)	1.691E-1 (pos.55972974)	2.333E-1 (pos.55972974)	1.061E-1 (pos.55972974)	2.198E-1 (pos.55972974)	NS,acute_myeloid_leukaemia,adenocarcinoma,alveolar,diffuse_large_B_cell_lymphoma,embryonal	Kinase insert domain receptor	ATP binding,Golgi apparatus,Hsp90 protein binding,angiogenesis,calcium-mediated signaling using intracellular calcium source,cell junction,cell migration involved in sprouting angiogenesis,cellular response to vascular endothelial growth factor stimulus,early endosome,embryonic hemopoiesis,endoplasmic reticulum,endosome,endothelium development,extracellular matrix organization,extracellular regio…	Adenocarcinoma;Bone Diseases;Bone Diseases, Developmental;Brain Diseases;Brain Ischemia;Breast Diseases;Breast Neoplasms;Carcinoma;Cardiovascular Diseases;Central Nervous System Diseases;Cerebral Hemorrhage;Cerebrovascular Disorders;Colonic Diseases;Colorectal Neoplasms;Congenital, Hereditary, and Neonatal Diseases and Abnormalities;Diabetes Complications;Diabetes Mellitus;Diabetic Nephropathies;…	3-(2-aminoquinazolin-6-yl)-1-(3,3-dimethylindolin-6-yl)-4-methylpyridin-2(1H)-one,3-(2-aminoquinazolin-6-yl)-4-methyl-1-3-(trifluoromethyl)phenylpyridin-2(1H)-one,4-2-4-chloro-3-(trifluoromethyl)phenylamino-3H-benzimidazol-5-yloxy-N-methyl-pyridine-2-carboxamide,6-chloro-N-pyrimidin-5-yl-3-{3-(trifluoromethyl)phenylamino}-1,2-benzisoxazole-7-carboxamide,ABT-869,AZD2171,Axitinib,CYC116,Cabozantini…	not provided	T=723, A=651	T=0.5262, A=0.4738	1e-05	6973.73
	chr4:55980239	C/T	C	T	SNV	KDR	KDR : intronic : NM_002253.2	1		35.86	-		NM_002253.2	c.798+54G>A					-0.3					CD80-like C2-set immunoglobulin domain,Immunoglobulin I-set domain,Immunoglobulin V-set domain,Immunoglobulin domain,Protein kinase domain,Protein tyrosine kinase	rs7692791		0.456 (ref)				YES										Kinase insert domain receptor	ATP binding,Golgi apparatus,Hsp90 protein binding,angiogenesis,calcium-mediated signaling using intracellular calcium source,cell junction,cell migration involved in sprouting angiogenesis,cellular response to vascular endothelial growth factor stimulus,early endosome,embryonic hemopoiesis,endoplasmic reticulum,endosome,endothelium development,extracellular matrix organization,extracellular regio…	Adenocarcinoma;Bone Diseases;Bone Diseases, Developmental;Brain Diseases;Brain Ischemia;Breast Diseases;Breast Neoplasms;Carcinoma;Cardiovascular Diseases;Central Nervous System Diseases;Cerebral Hemorrhage;Cerebrovascular Disorders;Colonic Diseases;Colorectal Neoplasms;Congenital, Hereditary, and Neonatal Diseases and Abnormalities;Diabetes Complications;Diabetes Mellitus;Diabetic Nephropathies;…	3-(2-aminoquinazolin-6-yl)-1-(3,3-dimethylindolin-6-yl)-4-methylpyridin-2(1H)-one,3-(2-aminoquinazolin-6-yl)-4-methyl-1-3-(trifluoromethyl)phenylpyridin-2(1H)-one,4-2-4-chloro-3-(trifluoromethyl)phenylamino-3H-benzimidazol-5-yloxy-N-methyl-pyridine-2-carboxamide,6-chloro-N-pyrimidin-5-yl-3-{3-(trifluoromethyl)phenylamino}-1,2-benzisoxazole-7-carboxamide,ABT-869,AZD2171,Axitinib,CYC116,Cabozantini…		C=1039, T=581	C=0.6414, T=0.3586	1e-05	5370.76
	chr5:112175651	A/G	A	G	SNV	APC	APC : exonic : NM_000038.5	1	COSM27993	45.76	+	16	NM_000038.5	c.4360A>G	p.Lys1454Glu	missense	benign/likely benign/VUS		4.02	0.06	56	0.147	Pathogenic	APC 15 residue motif,APC basic domain,APC repeat,Armadillo/beta-catenin-like repeat,EB-1 Binding Domain,SAMP Motif	rs111866410		0.001	0	0.0073	0.0025		6.056E-4 (pos.112175651)	0.0 (pos.112175651)	0.0 (pos.112175651)	1.513E-4 (pos.112175651)	0.0 (pos.112175651)	1.499E-5 (pos.112175651)	5.387E-3 (pos.112175651)	5.358E-4 (pos.112175651)	NS,adenocarcinoma,diffuse_large_B_cell_lymphoma	Adenomatous polyposis coli	Wnt signaling pathway,Wnt signalosome,axonal growth cone,beta-catenin binding,beta-catenin destruction complex,beta-catenin destruction complex assembly,beta-catenin destruction complex disassembly,bicellular tight junction,bicellular tight junction assembly,cadherin binding,canonical Wnt signaling pathway,catenin complex,cell adhesion,cell body fiber,cell cortex,cell cycle arrest,cell fate speci…	Aberrant Crypt Foci;Abnormalities, Multiple;Adenocarcinoma;Adenoma;Adenomatous Polyposis Coli;Adenomatous Polyps;Astrocytoma;Autistic Disorder;Bronchial Neoplasms;Carcinogenesis;Carcinoma;Carcinoma, Bronchogenic;Carcinoma, Hepatocellular;Carcinoma, Non-Small-Cell Lung;Cell Transformation, Neoplastic;Child Development Disorders, Pervasive;Colonic Diseases;Colonic Neoplasms;Colorectal Neoplasms;Col…		Benign,Likely benign,Uncertain significance	A=639, G=539	A=0.5424, G=0.4576	1e-05	7260.34
	chr7:140453136	ACT/TCT	ACT	CCT,CTC,CTT,GCT,TCT,TGT,TTT	SNV	BRAF	BRAF : exonic : NM_004333.4	1	COSM476	CCT=0.20, CTC=0.00, CTT=0.00, GCT=0.10, TCT=60.54, TGT=0.00, TTT=0.00	-	15	NM_004333.4	c.1799T>A	p.Val600Glu	missense	pathogenic		9.2,7.71,2.6	0	121	0.971	Pathogenic	Phorbol esters/diacylglycerol binding domain (C1 domain),Protein kinase domain,Protein tyrosine kinase,Raf-like Ras-binding domain	rs113488022							8.715E-5 (pos.140453136)	0.0 (pos.140453136)	0.0 (pos.140453136)	0.0 (pos.140453136)	6.06E-5 (pos.140453136)	0.0 (pos.140453136)	0.0 (pos.140453136)	1.65E-5 (pos.140453136)	B_cell_lymphoma_unspecified,B_cell_prolymphocytic_leukaemia,Hashimotos_thyroiditis,Hurthle_cell_carcinoma,Langerhans_cell_histiocytosis,Langerhans_cell_sarcoma,NS,Spitz,acinar_adenocarcinoma,acinar_carcinoma,acral_lentiginous,acute_myeloid_leukaemia,acute_myeloid_leukaemia_therapy_related,adamantinomatous,adenocarcinoma,adenoid_cystic_carcinoma,adenoma,admixed_hyperplastic_polyp-adenoma,amelanoti…	Murine sarcoma viral (v-raf) oncogene homolog B1	ATP binding,CD4-positive, alpha-beta T cell differentiation,MAP kinase kinase kinase activity,MAPK cascade,activation of MAPKK activity,animal organ morphogenesis,calcium ion binding,cell body,cellular response to calcium ion,cellular response to drug,cytoplasm,cytosol,establishment of protein localization to membrane,face development,glucose transport,head morphogenesis,identical protein binding…	Abnormalities, Multiple;Adenocarcinoma;Adenocarcinoma, Follicular;Adrenal Cortex Diseases;Adrenal Cortex Neoplasms;Adrenal Gland Diseases;Adrenal Gland Neoplasms;Adrenocortical Carcinoma;Ameloblastoma;Astrocytoma;Bone Diseases;Bone Neoplasms;Bronchial Neoplasms;Carcinogenesis;Carcinoma;Carcinoma, Bronchogenic;Carcinoma, Non-Small-Cell Lung;Cardiovascular Abnormalities;Cardiovascular Diseases;Colo…	(1E)-5-(1-piperidin-4-yl-3-pyridin-4-yl-1H-pyrazol-4-yl)-2,3-dihydro-1H-inden-1-one oxime,Dabrafenib,N-{2,4-difluoro-3-(5-pyridin-3-yl-1H-pyrrolo2,3-bpyridin-3-yl)carbonylphenyl}ethanesulfonamide,N-{3-(5-chloro-1H-pyrrolo2,3-bpyridin-3-yl)carbonyl-2,4-difluorophenyl}propane-1-sulfonamide,PLX4032,Regorafenib,Sorafenib,Vemurafenib,XL281	Likely pathogenic,Pathogenic	ACT=780, CCT=4, CTC=0, CTT=0, GCT=2, TCT=1206, TGT=0, TTT=0	ACT=0.3916, CCT=0.002, CTC=0.0, CTT=0.0, GCT=0.001, TCT=0.6054, TGT=0.0, TTT=0.0	1e-05	18476.9
	chr9:133738378	G/A	G	A	SNV	ABL1	ABL1 : exonic : NM_005157.5	1		3.05	+	4	NM_005157.5	c.778G>A	p.Val260Met	missense			7.83		21	0.988		Protein kinase domain,Protein tyrosine kinase,SH2 domain,SH3 domain,Variant SH3 domain	rs772834697							0.0 (pos.133738378)	0.0 (pos.133738378)	0.0 (pos.133738378)	0.0 (pos.133738378)	0.0 (pos.133738378)	1.511E-5 (pos.133738378)	0.0 (pos.133738378)	8.356E-6 (pos.133738378)		Abelson murine leukemia viral (v-abl) oncogene homolog 1	ATP binding,B cell proliferation involved in immune response,B cell receptor signaling pathway,B-1 B cell homeostasis,Bergmann glial cell differentiation,DNA binding,DNA damage induced protein phosphorylation,Fc-gamma receptor signaling pathway involved in phagocytosis,SH3 domain binding,actin cytoskeleton,actin cytoskeleton organization,actin filament binding,actin filament branching,actin monom…	Adenocarcinoma;Bone Marrow Diseases;Breast Diseases;Breast Neoplasms;Carcinogenesis;Carcinoma;Digestive System Diseases;Digestive System Neoplasms;Esophageal Diseases;Esophageal Neoplasms;Gastrointestinal Diseases;Gastrointestinal Neoplasms;Head and Neck Neoplasms;Hematologic Diseases;Hemic and Lymphatic Diseases;Immune System Diseases;Immunoproliferative Disorders;Leukemia;Leukemia, Lymphoid;Leu…	1-4-(PYRIDIN-4-YLOXY)PHENYL-3-3-(TRIFLUOROMETHYL)PHENYLUREA,2-amino-5-3-(1-ethyl-1H-pyrazol-5-yl)-1H-pyrrolo2,3-bpyridin-5-yl-N,N-dimethylbenzamide,2-{(6-OXO-1,6-DIHYDROPYRIDIN-3-YL)METHYLAMINO}-N-4-PROPYL-3-(TRIFLUOROMETHYL)PHENYLBENZAMIDE,5-3-(2-METHOXYPHENYL)-1H-PYRROLO2,3-BPYRIDIN-5-YL-N,N-DIMETHYLPYRIDINE-3-CARBOXAMIDE,6-(2,6-DICHLOROPHENYL)-2-{3-(HYDROXYMETHYL)PHENYLAMINO}-8-METHYLPYRIDO2,3…		G=732, A=23	G=0.9695, A=0.0305	0.02058	16.8662
	chr13:28610183	A/G	A	G	SNV	FLT3	FLT3 : intronic : NM_004119.2	1		51.8	-		NM_004119.2	c.1310-3T>C					1.33				neutral	Immunoglobulin domain,Protein kinase domain,Protein tyrosine kinase	rs2491231		0.437 (ref)	0.2179	0.293	0.3836	YES	7.186E-1 (pos.28610183)	7.435E-1 (pos.28610183)	7.02E-1 (pos.28610183)	7.989E-1 (pos.28610183)	6.013E-1 (pos.28610183)	7.702E-1 (pos.28610183)	2.756E-1 (pos.28610183)	6.993E-1 (pos.28610183)	NS,acute_myeloid_leukaemia	fms-related tyrosine kinase-3	ATP binding,B cell differentiation,animal organ regeneration,cellular response to cytokine stimulus,cellular response to glucocorticoid stimulus,common myeloid progenitor cell proliferation,cytokine receptor activity,cytokine-mediated signaling pathway,cytosol,dendritic cell differentiation,endoplasmic reticulum lumen,glucocorticoid receptor binding,hemopoiesis,integral component of plasma membra…	Cardiovascular Diseases;Embolism and Thrombosis;Hematologic Diseases;Hemic and Lymphatic Diseases;Immune System Diseases;Immunoproliferative Disorders;Leukemia;Leukemia, Biphenotypic, Acute;Leukemia, Lymphoid;Leukemia, Myeloid;Leukemia, Myeloid, Acute;Leukemia, Promyelocytic, Acute;Lymphatic Diseases;Lymphoproliferative Disorders;Neoplasms;Neoplasms by Histologic Type;Thrombosis;Vascular Diseases	ABT-869,AC220,MLN-518,MP470,Nintedanib,Ponatinib,Sorafenib,Sunitinib,XL999		A=963, G=1035	A=0.482, G=0.518	1e-05	11680.2
	chr19:3118933	TG/T	TG	T	INDEL	GNA11	GNA11 : exonic : NM_002067.4	1		26.26	+	5	NM_002067.4	c.623delG	p.Gly208fs	frameshiftDeletion			7.85,-0.24					G-protein alpha subunit								0.0 (pos.3118934)	0.0 (pos.3118934)	0.0 (pos.3118934)	0.0 (pos.3118934)	6.057E-5 (pos.3118934)	0.0 (pos.3118934)	0.0 (pos.3118934)	8.268E-6 (pos.3118934)	adenocarcinoma	Guanine nucleotide-binding protein, Gq class, GNA11	G-protein beta/gamma-subunit complex binding,G-protein coupled acetylcholine receptor signaling pathway,GTP binding,GTPase activity,action potential,cellular response to pH,cytoplasm,developmental pigmentation,entrainment of circadian clock,extracellular exosome,heart development,lysosomal membrane,metal ion binding,phospholipase C-activating dopamine receptor signaling pathway,photoreceptor oute…	Cardiovascular Abnormalities;Cardiovascular Diseases;Congenital Abnormalities;Congenital, Hereditary, and Neonatal Diseases and Abnormalities;Heart Defects, Congenital;Heart Diseases;Melanoma;Neoplasms;Neoplasms by Histologic Type;Neoplasms, Germ Cell and Embryonal;Neoplasms, Nerve Tissue;Neuroectodermal Tumors;Neuroendocrine Tumors;Nevi and Melanomas			TG=660, T=235	TG=0.7374, T=0.2626	1e-05	1057.72
RKO CAPE	chr3:178917005	A/G	A	G	SNV	PIK3CA	PIK3CA : intronic : NM_006218.3	1		50.35	+		NM_006218.3	c.352+40A>G					0.78					PI3-kinase family, p85-binding domain,PI3-kinase family, ras-binding domain,Phosphatidylinositol 3- and 4-kinase,Phosphoinositide 3-kinase C2,Phosphoinositide 3-kinase family, accessory domain (PIK domain)	rs3729674		0.273	0.1894	0.4163	0.2595	YES	2.088E-1 (pos.178917005)	1.025E-1 (pos.178917005)	2.111E-1 (pos.178917005)	1.629E-1 (pos.178917005)	2.48E-1 (pos.178917005)	2.006E-1 (pos.178917005)	4.305E-1 (pos.178917005)	2.156E-1 (pos.178917005)		Phosphatidylinositol 3-kinase, catalytic, alpha polypeptide	1-phosphatidylinositol-3-kinase activity,1-phosphatidylinositol-4-phosphate 3-kinase activity,ATP binding,ERBB2 signaling pathway,Fc-epsilon receptor signaling pathway,Fc-gamma receptor signaling pathway involved in phagocytosis,T cell costimulation,T cell receptor signaling pathway,activation of protein kinase activity,adipose tissue development,angiogenesis,cardiac muscle contraction,cellular r…	Adenocarcinoma;Adnexal Diseases;Autoimmune Diseases;Breast Diseases;Breast Neoplasms;Bronchial Neoplasms;Carcinoma;Carcinoma, Adenoid Cystic;Carcinoma, Bronchogenic;Carcinoma, Hepatocellular;Carcinoma, Non-Small-Cell Lung;Carcinoma, Renal Cell;Carcinoma, Squamous Cell;Colonic Diseases;Colorectal Neoplasms;Colorectal Neoplasms, Hereditary Nonpolyposis;Congenital Abnormalities;Congenital, Hereditar…	(1S,6BR,9AS,11R,11BR)-9A,11B-DIMETHYL-1-(METHYLOXY)METHYL-3,6,9-TRIOXO-1,6,6B,7,8,9,9A,10,11,11B-DECAHYDRO-3H-FURO4,3,2-DEINDENO4,5-H2BENZOPYRAN-11-YL ACETATE,Caffeine,XL147,XL765		A=992, G=1006	A=0.4965, G=0.5035	1e-05	11184.6
	chr3:178927410	A/G	A	G	SNV	PIK3CA	PIK3CA : exonic : NM_006218.3	1	COSM328028	50.98	+	7	NM_006218.3	c.1173A>G	p.Ile391Met	missense	benign		1.3		10	0.011	0.562	PI3-kinase family, p85-binding domain,PI3-kinase family, ras-binding domain,Phosphatidylinositol 3- and 4-kinase,Phosphoinositide 3-kinase C2,Phosphoinositide 3-kinase family, accessory domain (PIK domain)	rs2230461		0.088	0.068	0.2009	0.1096	YES	5.045E-2 (pos.178927410)	0.0 (pos.178927410)	6.333E-2 (pos.178927410)	2.42E-2 (pos.178927410)	1.811E-2 (pos.178927410)	7.024E-2 (pos.178927410)	2.089E-1 (pos.178927410)	6.488E-2 (pos.178927410)	NS,plasma_cell_myeloma	Phosphatidylinositol 3-kinase, catalytic, alpha polypeptide	1-phosphatidylinositol-3-kinase activity,1-phosphatidylinositol-4-phosphate 3-kinase activity,ATP binding,ERBB2 signaling pathway,Fc-epsilon receptor signaling pathway,Fc-gamma receptor signaling pathway involved in phagocytosis,T cell costimulation,T cell receptor signaling pathway,activation of protein kinase activity,adipose tissue development,angiogenesis,cardiac muscle contraction,cellular r…	Adenocarcinoma;Adnexal Diseases;Autoimmune Diseases;Breast Diseases;Breast Neoplasms;Bronchial Neoplasms;Carcinoma;Carcinoma, Adenoid Cystic;Carcinoma, Bronchogenic;Carcinoma, Hepatocellular;Carcinoma, Non-Small-Cell Lung;Carcinoma, Renal Cell;Carcinoma, Squamous Cell;Colonic Diseases;Colorectal Neoplasms;Colorectal Neoplasms, Hereditary Nonpolyposis;Congenital Abnormalities;Congenital, Hereditar…	(1S,6BR,9AS,11R,11BR)-9A,11B-DIMETHYL-1-(METHYLOXY)METHYL-3,6,9-TRIOXO-1,6,6B,7,8,9,9A,10,11,11B-DECAHYDRO-3H-FURO4,3,2-DEINDENO4,5-H2BENZOPYRAN-11-YL ACETATE,Caffeine,XL147,XL765	Benign	A=980, G=1019	A=0.4902, G=0.5098	1e-05	11402.8
	chr3:178952085	A/G	A	G,T	SNV	PIK3CA	PIK3CA : exonic : NM_006218.3	1	COSM775	G=49.45, T=0.00	+	21	NM_006218.3	c.3140A>G	p.His1047Arg	missense	pathogenic		8.86		29	0.639	Pathogenic	PI3-kinase family, p85-binding domain,PI3-kinase family, ras-binding domain,Phosphatidylinositol 3- and 4-kinase,Phosphoinositide 3-kinase C2,Phosphoinositide 3-kinase family, accessory domain (PIK domain)	rs121913279							0.0;0.0 (pos.178952085)	0.0;0.0 (pos.178952085)	0.0;0.0 (pos.178952085)	0.0;0.0 (pos.178952085)	0.0;0.0 (pos.178952085)	1.505E-5;1.505E-5 (pos.178952085)	0.0;0.0 (pos.178952085)	8.317E-6;8.317E-6 (pos.178952085)	Brenner_tumour,CLOVES_syndrome,ER-HER-positive_carcinoma,ER-PR-HER-positive_carcinoma,ER-PR-positive_carcinoma,ER-positive_carcinoma,HER-positive_carcinoma,Hurthle_cell_carcinoma,Merkel_cell_carcinoma,NS,SHH_subtype,acinic_cell_carcinoma,adenocarcinoma,adenoid_cystic_carcinoma,adenoma,alveolar,anaplastic_carcinoma,astrocytoma_Grade_III,astrocytoma_Grade_IV,atypical,basal_(triple-negative)_carcino…	Phosphatidylinositol 3-kinase, catalytic, alpha polypeptide	1-phosphatidylinositol-3-kinase activity,1-phosphatidylinositol-4-phosphate 3-kinase activity,ATP binding,ERBB2 signaling pathway,Fc-epsilon receptor signaling pathway,Fc-gamma receptor signaling pathway involved in phagocytosis,T cell costimulation,T cell receptor signaling pathway,activation of protein kinase activity,adipose tissue development,angiogenesis,cardiac muscle contraction,cellular r…	Adenocarcinoma;Adnexal Diseases;Autoimmune Diseases;Breast Diseases;Breast Neoplasms;Bronchial Neoplasms;Carcinoma;Carcinoma, Adenoid Cystic;Carcinoma, Bronchogenic;Carcinoma, Hepatocellular;Carcinoma, Non-Small-Cell Lung;Carcinoma, Renal Cell;Carcinoma, Squamous Cell;Colonic Diseases;Colorectal Neoplasms;Colorectal Neoplasms, Hereditary Nonpolyposis;Congenital Abnormalities;Congenital, Hereditar…	(1S,6BR,9AS,11R,11BR)-9A,11B-DIMETHYL-1-(METHYLOXY)METHYL-3,6,9-TRIOXO-1,6,6B,7,8,9,9A,10,11,11B-DECAHYDRO-3H-FURO4,3,2-DEINDENO4,5-H2BENZOPYRAN-11-YL ACETATE,Caffeine,XL147,XL765	Likely pathogenic,Pathogenic,other	A=1010, G=988, T=0	A=0.5055, G=0.4945, T=0.0	1e-05	13809.9
	chr4:55597458	A/G	A	G	SNV	KIT	KIT : intronic : NM_000222.2	1		49.42	+		NM_000222.2	c.2142-36A>G			benign		-0.32					Immunoglobulin I-set domain,Immunoglobulin domain,Protein kinase domain,Protein tyrosine kinase	rs17084713		0.026	0.0003	0.0801	0.0274		4.964E-3 (pos.55597458)	0.0 (pos.55597458)	3.348E-3 (pos.55597458)	0.0 (pos.55597458)	0.0 (pos.55597458)	4.384E-4 (pos.55597458)	8.071E-2 (pos.55597458)	7.655E-3 (pos.55597458)		Hardy-Zuckerman 4 feline sarcoma (v-kit) oncogene	ATP binding,Fc receptor signaling pathway,Kit signaling pathway,MAPK cascade,Ras guanyl-nucleotide exchange factor activity,T cell differentiation,acrosomal vesicle,actin cytoskeleton reorganization,activation of MAPK activity,cell chemotaxis,cell-cell junction,cellular response to thyroid hormone stimulus,cytokine binding,cytokine-mediated signaling pathway,cytoplasmic side of plasma membrane,de…	Albinism;Amino Acid Metabolism, Inborn Errors;Breast Diseases;Breast Neoplasms;Bronchial Neoplasms;Carcinoma, Bronchogenic;Carcinoma, Non-Small-Cell Lung;Congenital, Hereditary, and Neonatal Diseases and Abnormalities;Digestive System Diseases;Digestive System Neoplasms;Endocrine Gland Neoplasms;Endocrine System Diseases;Eye Diseases, Hereditary;Gastrointestinal Diseases;Gastrointestinal Neoplasm…	ABT-869,Dasatinib,Imatinib,Lenvatinib,MP470,Nilotinib,OSI-930,Pazopanib,Phosphonotyrosine,Ponatinib,Regorafenib,Sorafenib,Sunitinib,XL184,XL820	Benign	A=1011, G=988	A=0.5058, G=0.4942	1e-05	10877.5
	chr4:55972974	T/A	T	A	SNV	KDR	KDR : exonic : NM_002253.2	1	COSM149673	49.95	-	11	NM_002253.2	c.1416A>T	p.Gln472His	missense			-0.05	0.03	24	0.003	neutral	CD80-like C2-set immunoglobulin domain,Immunoglobulin I-set domain,Immunoglobulin V-set domain,Immunoglobulin domain,Protein kinase domain,Protein tyrosine kinase	rs1870377		0.212	0.2369	0.1101	0.1939	YES	9.352E-2 (pos.55972974)	4.637E-1 (pos.55972974)	2.307E-1 (pos.55972974)	2.857E-1 (pos.55972974)	1.691E-1 (pos.55972974)	2.333E-1 (pos.55972974)	1.061E-1 (pos.55972974)	2.198E-1 (pos.55972974)	NS,acute_myeloid_leukaemia,adenocarcinoma,alveolar,diffuse_large_B_cell_lymphoma,embryonal	Kinase insert domain receptor	ATP binding,Golgi apparatus,Hsp90 protein binding,angiogenesis,calcium-mediated signaling using intracellular calcium source,cell junction,cell migration involved in sprouting angiogenesis,cellular response to vascular endothelial growth factor stimulus,early endosome,embryonic hemopoiesis,endoplasmic reticulum,endosome,endothelium development,extracellular matrix organization,extracellular regio…	Adenocarcinoma;Bone Diseases;Bone Diseases, Developmental;Brain Diseases;Brain Ischemia;Breast Diseases;Breast Neoplasms;Carcinoma;Cardiovascular Diseases;Central Nervous System Diseases;Cerebral Hemorrhage;Cerebrovascular Disorders;Colonic Diseases;Colorectal Neoplasms;Congenital, Hereditary, and Neonatal Diseases and Abnormalities;Diabetes Complications;Diabetes Mellitus;Diabetic Nephropathies;…	3-(2-aminoquinazolin-6-yl)-1-(3,3-dimethylindolin-6-yl)-4-methylpyridin-2(1H)-one,3-(2-aminoquinazolin-6-yl)-4-methyl-1-3-(trifluoromethyl)phenylpyridin-2(1H)-one,4-2-4-chloro-3-(trifluoromethyl)phenylamino-3H-benzimidazol-5-yloxy-N-methyl-pyridine-2-carboxamide,6-chloro-N-pyrimidin-5-yl-3-{3-(trifluoromethyl)phenylamino}-1,2-benzisoxazole-7-carboxamide,ABT-869,AZD2171,Axitinib,CYC116,Cabozantini…	not provided	T=998, A=996	T=0.5005, A=0.4995	1e-05	11027
	chr4:55980239	C/T	C	T	SNV	KDR	KDR : intronic : NM_002253.2	1		38.91	-		NM_002253.2	c.798+54G>A					-0.3					CD80-like C2-set immunoglobulin domain,Immunoglobulin I-set domain,Immunoglobulin V-set domain,Immunoglobulin domain,Protein kinase domain,Protein tyrosine kinase	rs7692791		0.456 (ref)				YES										Kinase insert domain receptor	ATP binding,Golgi apparatus,Hsp90 protein binding,angiogenesis,calcium-mediated signaling using intracellular calcium source,cell junction,cell migration involved in sprouting angiogenesis,cellular response to vascular endothelial growth factor stimulus,early endosome,embryonic hemopoiesis,endoplasmic reticulum,endosome,endothelium development,extracellular matrix organization,extracellular regio…	Adenocarcinoma;Bone Diseases;Bone Diseases, Developmental;Brain Diseases;Brain Ischemia;Breast Diseases;Breast Neoplasms;Carcinoma;Cardiovascular Diseases;Central Nervous System Diseases;Cerebral Hemorrhage;Cerebrovascular Disorders;Colonic Diseases;Colorectal Neoplasms;Congenital, Hereditary, and Neonatal Diseases and Abnormalities;Diabetes Complications;Diabetes Mellitus;Diabetic Nephropathies;…	3-(2-aminoquinazolin-6-yl)-1-(3,3-dimethylindolin-6-yl)-4-methylpyridin-2(1H)-one,3-(2-aminoquinazolin-6-yl)-4-methyl-1-3-(trifluoromethyl)phenylpyridin-2(1H)-one,4-2-4-chloro-3-(trifluoromethyl)phenylamino-3H-benzimidazol-5-yloxy-N-methyl-pyridine-2-carboxamide,6-chloro-N-pyrimidin-5-yl-3-{3-(trifluoromethyl)phenylamino}-1,2-benzisoxazole-7-carboxamide,ABT-869,AZD2171,Axitinib,CYC116,Cabozantini…		C=1217, T=775	C=0.6109, T=0.3891	1e-05	7503.38
	chr5:112175651	A/G	A	G	SNV	APC	APC : exonic : NM_000038.5	1	COSM27993	52.3	+	16	NM_000038.5	c.4360A>G	p.Lys1454Glu	missense	benign/likely benign/VUS		4.02	0.06	56	0.147	Pathogenic	APC 15 residue motif,APC basic domain,APC repeat,Armadillo/beta-catenin-like repeat,EB-1 Binding Domain,SAMP Motif	rs111866410		0.001	0	0.0073	0.0025		6.056E-4 (pos.112175651)	0.0 (pos.112175651)	0.0 (pos.112175651)	1.513E-4 (pos.112175651)	0.0 (pos.112175651)	1.499E-5 (pos.112175651)	5.387E-3 (pos.112175651)	5.358E-4 (pos.112175651)	NS,adenocarcinoma,diffuse_large_B_cell_lymphoma	Adenomatous polyposis coli	Wnt signaling pathway,Wnt signalosome,axonal growth cone,beta-catenin binding,beta-catenin destruction complex,beta-catenin destruction complex assembly,beta-catenin destruction complex disassembly,bicellular tight junction,bicellular tight junction assembly,cadherin binding,canonical Wnt signaling pathway,catenin complex,cell adhesion,cell body fiber,cell cortex,cell cycle arrest,cell fate speci…	Aberrant Crypt Foci;Abnormalities, Multiple;Adenocarcinoma;Adenoma;Adenomatous Polyposis Coli;Adenomatous Polyps;Astrocytoma;Autistic Disorder;Bronchial Neoplasms;Carcinogenesis;Carcinoma;Carcinoma, Bronchogenic;Carcinoma, Hepatocellular;Carcinoma, Non-Small-Cell Lung;Cell Transformation, Neoplastic;Child Development Disorders, Pervasive;Colonic Diseases;Colonic Neoplasms;Colorectal Neoplasms;Col…		Benign,Likely benign,Uncertain significance	A=849, G=931	A=0.477, G=0.523	1e-05	13309.9
	chr5:149433595	G/G	GT	G	INDEL	CSF1R,HMGXB3	CSF1R : utr_3 : NM_005211.3, HMGXB3 : downstream : NM_014983.2	1		100	+, -		NM_014983.2, NM_005211.3	c.*37delA					0.04,0.82					Immunoglobulin domain,Protein kinase domain,Protein tyrosine kinase	rs2066934,rs35308019,rs386693509		0.203				YES	7.768E-1 (pos.149433596)	7.267E-1 (pos.149433596)	7.465E-1 (pos.149433596)	8.023E-1 (pos.149433596)	6.889E-1 (pos.149433596)	7.733E-1 (pos.149433596)	9.482E-1 (pos.149433596)	7.754E-1 (pos.149433596)		Colony-stimulating factor-1 receptor; oncogene FMS (McDonough feline sarcoma)	ATP binding,CSF1-CSF1R complex,DNA binding,axon guidance,biological_process,cell proliferation,cell surface,cell-cell junction maintenance,cellular response to cytokine stimulus,cellular response to macrophage colony-stimulating factor stimulus,cellular_component,cytokine binding,cytokine-mediated signaling pathway,forebrain neuron differentiation,hemopoiesis,inflammatory response,innate immune r…	Autoimmune Diseases;Brain Diseases;Breast Diseases;Breast Neoplasms;Central Nervous System Diseases;Female Urogenital Diseases;Female Urogenital Diseases and Pregnancy Complications;Glomerulonephritis;Glomerulonephritis, IGA;Immune System Diseases;Kidney Diseases;Leukemia;Leukemia, Myeloid;Leukemia, Myeloid, Acute;Leukoencephalopathies;Male Urogenital Diseases;Neoplasm Metastasis;Neoplasms;Neopla…	5-CYANO-FURAN-2-CARBOXYLIC ACID 5-HYDROXYMETHYL-2-(4-METHYL-PIPERIDIN-1-YL)-PHENYL-AMIDE,6-CHLORO-3-(3-METHYLISOXAZOL-5-YL)-4-PHENYLQUINOLIN-2(1H)-ONE,ABT-869,Imatinib,Sunitinib		GT=0, G=603	GT=0.0, G=1.0	1e-05	10088.3
	chr5:149433597	GA/GA	G	GA	INDEL	CSF1R,HMGXB3	CSF1R : utr_3 : NM_005211.3, HMGXB3 : downstream : NM_014983.2	1		99.34	+, -		NM_014983.2, NM_005211.3	c.*35insT					-0.26					Immunoglobulin domain,Protein kinase domain,Protein tyrosine kinase	rs2066933,rs386693509		0.204 (ref)	0.4213	0.3584	0.4959	YES	7.757E-1 (pos.149433597)	7.198E-1 (pos.149433597)	7.453E-1 (pos.149433597)	8.016E-1 (pos.149433597)	6.887E-1 (pos.149433597)	7.73E-1 (pos.149433597)	9.483E-1 (pos.149433597)	7.745E-1 (pos.149433597)		Colony-stimulating factor-1 receptor; oncogene FMS (McDonough feline sarcoma)	ATP binding,CSF1-CSF1R complex,DNA binding,axon guidance,biological_process,cell proliferation,cell surface,cell-cell junction maintenance,cellular response to cytokine stimulus,cellular response to macrophage colony-stimulating factor stimulus,cellular_component,cytokine binding,cytokine-mediated signaling pathway,forebrain neuron differentiation,hemopoiesis,inflammatory response,innate immune r…	Autoimmune Diseases;Brain Diseases;Breast Diseases;Breast Neoplasms;Central Nervous System Diseases;Female Urogenital Diseases;Female Urogenital Diseases and Pregnancy Complications;Glomerulonephritis;Glomerulonephritis, IGA;Immune System Diseases;Kidney Diseases;Leukemia;Leukemia, Myeloid;Leukemia, Myeloid, Acute;Leukoencephalopathies;Male Urogenital Diseases;Neoplasm Metastasis;Neoplasms;Neopla…	5-CYANO-FURAN-2-CARBOXYLIC ACID 5-HYDROXYMETHYL-2-(4-METHYL-PIPERIDIN-1-YL)-PHENYL-AMIDE,6-CHLORO-3-(3-METHYLISOXAZOL-5-YL)-4-PHENYLQUINOLIN-2(1H)-ONE,ABT-869,Imatinib,Sunitinib		G=4, GA=599	G=0.0066, GA=0.9934	1e-05	7650.08
	chr7:140453136	ACT/TCT	ACT	CCT,CTC,CTT,GCT,TCT,TGT,TTT	SNV	BRAF	BRAF : exonic : NM_004333.4	1	COSM476	CCT=0.25, CTC=0.00, CTT=0.00, GCT=0.00, TCT=63.55, TGT=0.00, TTT=0.00	-	15	NM_004333.4	c.1799T>A	p.Val600Glu	missense	pathogenic		9.2,7.71,2.6	0	121	0.971	Pathogenic	Phorbol esters/diacylglycerol binding domain (C1 domain),Protein kinase domain,Protein tyrosine kinase,Raf-like Ras-binding domain	rs113488022							8.715E-5 (pos.140453136)	0.0 (pos.140453136)	0.0 (pos.140453136)	0.0 (pos.140453136)	6.06E-5 (pos.140453136)	0.0 (pos.140453136)	0.0 (pos.140453136)	1.65E-5 (pos.140453136)	B_cell_lymphoma_unspecified,B_cell_prolymphocytic_leukaemia,Hashimotos_thyroiditis,Hurthle_cell_carcinoma,Langerhans_cell_histiocytosis,Langerhans_cell_sarcoma,NS,Spitz,acinar_adenocarcinoma,acinar_carcinoma,acral_lentiginous,acute_myeloid_leukaemia,acute_myeloid_leukaemia_therapy_related,adamantinomatous,adenocarcinoma,adenoid_cystic_carcinoma,adenoma,admixed_hyperplastic_polyp-adenoma,amelanoti…	Murine sarcoma viral (v-raf) oncogene homolog B1	ATP binding,CD4-positive, alpha-beta T cell differentiation,MAP kinase kinase kinase activity,MAPK cascade,activation of MAPKK activity,animal organ morphogenesis,calcium ion binding,cell body,cellular response to calcium ion,cellular response to drug,cytoplasm,cytosol,establishment of protein localization to membrane,face development,glucose transport,head morphogenesis,identical protein binding…	Abnormalities, Multiple;Adenocarcinoma;Adenocarcinoma, Follicular;Adrenal Cortex Diseases;Adrenal Cortex Neoplasms;Adrenal Gland Diseases;Adrenal Gland Neoplasms;Adrenocortical Carcinoma;Ameloblastoma;Astrocytoma;Bone Diseases;Bone Neoplasms;Bronchial Neoplasms;Carcinogenesis;Carcinoma;Carcinoma, Bronchogenic;Carcinoma, Non-Small-Cell Lung;Cardiovascular Abnormalities;Cardiovascular Diseases;Colo…	(1E)-5-(1-piperidin-4-yl-3-pyridin-4-yl-1H-pyrazol-4-yl)-2,3-dihydro-1H-inden-1-one oxime,Dabrafenib,N-{2,4-difluoro-3-(5-pyridin-3-yl-1H-pyrrolo2,3-bpyridin-3-yl)carbonylphenyl}ethanesulfonamide,N-{3-(5-chloro-1H-pyrrolo2,3-bpyridin-3-yl)carbonyl-2,4-difluorophenyl}propane-1-sulfonamide,PLX4032,Regorafenib,Sorafenib,Vemurafenib,XL281	Likely pathogenic,Pathogenic	ACT=723, CCT=5, CTC=0, CTT=0, GCT=0, TCT=1269, TGT=0, TTT=0	ACT=0.362, CCT=0.0025, CTC=0.0, CTT=0.0, GCT=0.0, TCT=0.6355, TGT=0.0, TTT=0.0	1e-05	19800.4
	chr9:133738378	G/A	G	A	SNV	ABL1	ABL1 : exonic : NM_005157.5	1		4.17	+	4	NM_005157.5	c.778G>A	p.Val260Met	missense			7.83		21	0.988		Protein kinase domain,Protein tyrosine kinase,SH2 domain,SH3 domain,Variant SH3 domain	rs772834697							0.0 (pos.133738378)	0.0 (pos.133738378)	0.0 (pos.133738378)	0.0 (pos.133738378)	0.0 (pos.133738378)	1.511E-5 (pos.133738378)	0.0 (pos.133738378)	8.356E-6 (pos.133738378)		Abelson murine leukemia viral (v-abl) oncogene homolog 1	ATP binding,B cell proliferation involved in immune response,B cell receptor signaling pathway,B-1 B cell homeostasis,Bergmann glial cell differentiation,DNA binding,DNA damage induced protein phosphorylation,Fc-gamma receptor signaling pathway involved in phagocytosis,SH3 domain binding,actin cytoskeleton,actin cytoskeleton organization,actin filament binding,actin filament branching,actin monom…	Adenocarcinoma;Bone Marrow Diseases;Breast Diseases;Breast Neoplasms;Carcinogenesis;Carcinoma;Digestive System Diseases;Digestive System Neoplasms;Esophageal Diseases;Esophageal Neoplasms;Gastrointestinal Diseases;Gastrointestinal Neoplasms;Head and Neck Neoplasms;Hematologic Diseases;Hemic and Lymphatic Diseases;Immune System Diseases;Immunoproliferative Disorders;Leukemia;Leukemia, Lymphoid;Leu…	1-4-(PYRIDIN-4-YLOXY)PHENYL-3-3-(TRIFLUOROMETHYL)PHENYLUREA,2-amino-5-3-(1-ethyl-1H-pyrazol-5-yl)-1H-pyrrolo2,3-bpyridin-5-yl-N,N-dimethylbenzamide,2-{(6-OXO-1,6-DIHYDROPYRIDIN-3-YL)METHYLAMINO}-N-4-PROPYL-3-(TRIFLUOROMETHYL)PHENYLBENZAMIDE,5-3-(2-METHOXYPHENYL)-1H-PYRROLO2,3-BPYRIDIN-5-YL-N,N-DIMETHYLPYRIDINE-3-CARBOXAMIDE,6-(2,6-DICHLOROPHENYL)-2-{3-(HYDROXYMETHYL)PHENYLAMINO}-8-METHYLPYRIDO2,3…		G=1700, A=74	G=0.9583, A=0.0417	1e-05	84.2718
	chr13:28610183	A/G	A	G	SNV	FLT3	FLT3 : intronic : NM_004119.2	1		50.23	-		NM_004119.2	c.1310-3T>C					1.33				neutral	Immunoglobulin domain,Protein kinase domain,Protein tyrosine kinase	rs2491231		0.437 (ref)	0.2179	0.293	0.3836	YES	7.186E-1 (pos.28610183)	7.435E-1 (pos.28610183)	7.02E-1 (pos.28610183)	7.989E-1 (pos.28610183)	6.013E-1 (pos.28610183)	7.702E-1 (pos.28610183)	2.756E-1 (pos.28610183)	6.993E-1 (pos.28610183)	NS,acute_myeloid_leukaemia	fms-related tyrosine kinase-3	ATP binding,B cell differentiation,animal organ regeneration,cellular response to cytokine stimulus,cellular response to glucocorticoid stimulus,common myeloid progenitor cell proliferation,cytokine receptor activity,cytokine-mediated signaling pathway,cytosol,dendritic cell differentiation,endoplasmic reticulum lumen,glucocorticoid receptor binding,hemopoiesis,integral component of plasma membra…	Cardiovascular Diseases;Embolism and Thrombosis;Hematologic Diseases;Hemic and Lymphatic Diseases;Immune System Diseases;Immunoproliferative Disorders;Leukemia;Leukemia, Biphenotypic, Acute;Leukemia, Lymphoid;Leukemia, Myeloid;Leukemia, Myeloid, Acute;Leukemia, Promyelocytic, Acute;Lymphatic Diseases;Lymphoproliferative Disorders;Neoplasms;Neoplasms by Histologic Type;Thrombosis;Vascular Diseases	ABT-869,AC220,MLN-518,MP470,Nintedanib,Ponatinib,Sorafenib,Sunitinib,XL999		A=995, G=1004	A=0.4977, G=0.5023	1e-05	11146.5
	chr17:7579472	G/C	G	C,T	SNV	TP53	TP53 : exonic : NM_000546.5	1	COSM250061	C=54.07, T=0.00	-	4	NM_000546.5	c.215C>G	p.Pro72Arg	missense	benign	https://www.pharmgkb.org/variant/PA166155173/variantAnnotation	1.02	0.6	103	neutral	0.219,0.361	P53 DNA-binding domain,P53 tetramerisation motif	rs1042522		0.457 (ref)	0.2548	0.4051	0.37	YES	7.115E-1 (pos.7579472)	5.892E-1 (pos.7579472)	6.648E-1 (pos.7579472)	7.304E-1 (pos.7579472)	4.988E-1 (pos.7579472)	7.345E-1 (pos.7579472)	3.842E-1 (pos.7579472)	6.6E-1 (pos.7579472)	NS,adenocarcinoma,astrocytoma_Grade_IV,ductal_carcinoma,epithelial,hepatocellular_carcinoma,other,squamous_cell_carcinoma	Tumor protein p53	ATP binding,DNA binding,DNA damage response, signal transduction by p53 class mediator,DNA damage response, signal transduction by p53 class mediator resulting in cell cycle arrest,DNA damage response, signal transduction by p53 class mediator resulting in transcription of p21 class mediator,DNA strand renaturation,ER overload response,PML body,RNA polymerase II transcription factor activity, seq…	Acute Kidney Injury;Adenocarcinoma;Adenocarcinoma, Clear Cell;Adenoma;Adnexal Diseases;Adrenal Cortex Diseases;Adrenal Cortex Neoplasms;Adrenal Gland Diseases;Adrenal Gland Neoplasms;Adrenocortical Carcinoma;Amyotrophic Lateral Sclerosis;Aortic Stenosis, Subvalvular;Aortic Valve Stenosis;Arsenic Poisoning;Astrocytoma;Balkan Nephropathy;Biliary Tract Diseases;Biliary Tract Neoplasms;Blood Coagulat…	1-(9-ethyl-9H-carbazol-3-yl)-N-methylmethanamine,AZD 3355,Acetylsalicylic acid	Benign,Uncertain significance,drug response	G=265, C=312, T=0	G=0.4593, C=0.5407, T=0.0	1e-05	4494.81
	chr19:3118933	TG/T	TG	T	INDEL	GNA11	GNA11 : exonic : NM_002067.4	1		27.06	+	5	NM_002067.4	c.623delG	p.Gly208fs	frameshiftDeletion			7.85,-0.24					G-protein alpha subunit								0.0 (pos.3118934)	0.0 (pos.3118934)	0.0 (pos.3118934)	0.0 (pos.3118934)	6.057E-5 (pos.3118934)	0.0 (pos.3118934)	0.0 (pos.3118934)	8.268E-6 (pos.3118934)	adenocarcinoma	Guanine nucleotide-binding protein, Gq class, GNA11	G-protein beta/gamma-subunit complex binding,G-protein coupled acetylcholine receptor signaling pathway,GTP binding,GTPase activity,action potential,cellular response to pH,cytoplasm,developmental pigmentation,entrainment of circadian clock,extracellular exosome,heart development,lysosomal membrane,metal ion binding,phospholipase C-activating dopamine receptor signaling pathway,photoreceptor oute…	Cardiovascular Abnormalities;Cardiovascular Diseases;Congenital Abnormalities;Congenital, Hereditary, and Neonatal Diseases and Abnormalities;Heart Defects, Congenital;Heart Diseases;Melanoma;Neoplasms;Neoplasms by Histologic Type;Neoplasms, Germ Cell and Embryonal;Neoplasms, Nerve Tissue;Neuroectodermal Tumors;Neuroendocrine Tumors;Nevi and Melanomas			TG=903, T=335	TG=0.7294, T=0.2706	1e-05	1350.19
RKO Kaempherol	chr3:178917005	A/G	A	G	SNV	PIK3CA	PIK3CA : intronic : NM_006218.3	1		52.59	+		NM_006218.3	c.352+40A>G					0.78					PI3-kinase family, p85-binding domain,PI3-kinase family, ras-binding domain,Phosphatidylinositol 3- and 4-kinase,Phosphoinositide 3-kinase C2,Phosphoinositide 3-kinase family, accessory domain (PIK domain)	rs3729674		0.273	0.1894	0.4163	0.2595	YES	2.088E-1 (pos.178917005)	1.025E-1 (pos.178917005)	2.111E-1 (pos.178917005)	1.629E-1 (pos.178917005)	2.48E-1 (pos.178917005)	2.006E-1 (pos.178917005)	4.305E-1 (pos.178917005)	2.156E-1 (pos.178917005)		Phosphatidylinositol 3-kinase, catalytic, alpha polypeptide	1-phosphatidylinositol-3-kinase activity,1-phosphatidylinositol-4-phosphate 3-kinase activity,ATP binding,ERBB2 signaling pathway,Fc-epsilon receptor signaling pathway,Fc-gamma receptor signaling pathway involved in phagocytosis,T cell costimulation,T cell receptor signaling pathway,activation of protein kinase activity,adipose tissue development,angiogenesis,cardiac muscle contraction,cellular r…	Adenocarcinoma;Adnexal Diseases;Autoimmune Diseases;Breast Diseases;Breast Neoplasms;Bronchial Neoplasms;Carcinoma;Carcinoma, Adenoid Cystic;Carcinoma, Bronchogenic;Carcinoma, Hepatocellular;Carcinoma, Non-Small-Cell Lung;Carcinoma, Renal Cell;Carcinoma, Squamous Cell;Colonic Diseases;Colorectal Neoplasms;Colorectal Neoplasms, Hereditary Nonpolyposis;Congenital Abnormalities;Congenital, Hereditar…	(1S,6BR,9AS,11R,11BR)-9A,11B-DIMETHYL-1-(METHYLOXY)METHYL-3,6,9-TRIOXO-1,6,6B,7,8,9,9A,10,11,11B-DECAHYDRO-3H-FURO4,3,2-DEINDENO4,5-H2BENZOPYRAN-11-YL ACETATE,Caffeine,XL147,XL765		A=577, G=640	A=0.4741, G=0.5259	1e-05	7228.5
	chr3:178927410	A/G	A	G	SNV	PIK3CA	PIK3CA : exonic : NM_006218.3	1	COSM328028	54.8	+	7	NM_006218.3	c.1173A>G	p.Ile391Met	missense	benign		1.3		10	0.011	0.562	PI3-kinase family, p85-binding domain,PI3-kinase family, ras-binding domain,Phosphatidylinositol 3- and 4-kinase,Phosphoinositide 3-kinase C2,Phosphoinositide 3-kinase family, accessory domain (PIK domain)	rs2230461		0.088	0.068	0.2009	0.1096	YES	5.045E-2 (pos.178927410)	0.0 (pos.178927410)	6.333E-2 (pos.178927410)	2.42E-2 (pos.178927410)	1.811E-2 (pos.178927410)	7.024E-2 (pos.178927410)	2.089E-1 (pos.178927410)	6.488E-2 (pos.178927410)	NS,plasma_cell_myeloma	Phosphatidylinositol 3-kinase, catalytic, alpha polypeptide	1-phosphatidylinositol-3-kinase activity,1-phosphatidylinositol-4-phosphate 3-kinase activity,ATP binding,ERBB2 signaling pathway,Fc-epsilon receptor signaling pathway,Fc-gamma receptor signaling pathway involved in phagocytosis,T cell costimulation,T cell receptor signaling pathway,activation of protein kinase activity,adipose tissue development,angiogenesis,cardiac muscle contraction,cellular r…	Adenocarcinoma;Adnexal Diseases;Autoimmune Diseases;Breast Diseases;Breast Neoplasms;Bronchial Neoplasms;Carcinoma;Carcinoma, Adenoid Cystic;Carcinoma, Bronchogenic;Carcinoma, Hepatocellular;Carcinoma, Non-Small-Cell Lung;Carcinoma, Renal Cell;Carcinoma, Squamous Cell;Colonic Diseases;Colorectal Neoplasms;Colorectal Neoplasms, Hereditary Nonpolyposis;Congenital Abnormalities;Congenital, Hereditar…	(1S,6BR,9AS,11R,11BR)-9A,11B-DIMETHYL-1-(METHYLOXY)METHYL-3,6,9-TRIOXO-1,6,6B,7,8,9,9A,10,11,11B-DECAHYDRO-3H-FURO4,3,2-DEINDENO4,5-H2BENZOPYRAN-11-YL ACETATE,Caffeine,XL147,XL765	Benign	A=904, G=1096	A=0.452, G=0.548	1e-05	12739.8
	chr3:178952085	A/G	A	G,T	SNV	PIK3CA	PIK3CA : exonic : NM_006218.3	1	COSM775	G=52.55, T=0.05	+	21	NM_006218.3	c.3140A>G	p.His1047Arg	missense	pathogenic		8.86		29	0.639	Pathogenic	PI3-kinase family, p85-binding domain,PI3-kinase family, ras-binding domain,Phosphatidylinositol 3- and 4-kinase,Phosphoinositide 3-kinase C2,Phosphoinositide 3-kinase family, accessory domain (PIK domain)	rs121913279							0.0;0.0 (pos.178952085)	0.0;0.0 (pos.178952085)	0.0;0.0 (pos.178952085)	0.0;0.0 (pos.178952085)	0.0;0.0 (pos.178952085)	1.505E-5;1.505E-5 (pos.178952085)	0.0;0.0 (pos.178952085)	8.317E-6;8.317E-6 (pos.178952085)	Brenner_tumour,CLOVES_syndrome,ER-HER-positive_carcinoma,ER-PR-HER-positive_carcinoma,ER-PR-positive_carcinoma,ER-positive_carcinoma,HER-positive_carcinoma,Hurthle_cell_carcinoma,Merkel_cell_carcinoma,NS,SHH_subtype,acinic_cell_carcinoma,adenocarcinoma,adenoid_cystic_carcinoma,adenoma,alveolar,anaplastic_carcinoma,astrocytoma_Grade_III,astrocytoma_Grade_IV,atypical,basal_(triple-negative)_carcino…	Phosphatidylinositol 3-kinase, catalytic, alpha polypeptide	1-phosphatidylinositol-3-kinase activity,1-phosphatidylinositol-4-phosphate 3-kinase activity,ATP binding,ERBB2 signaling pathway,Fc-epsilon receptor signaling pathway,Fc-gamma receptor signaling pathway involved in phagocytosis,T cell costimulation,T cell receptor signaling pathway,activation of protein kinase activity,adipose tissue development,angiogenesis,cardiac muscle contraction,cellular r…	Adenocarcinoma;Adnexal Diseases;Autoimmune Diseases;Breast Diseases;Breast Neoplasms;Bronchial Neoplasms;Carcinoma;Carcinoma, Adenoid Cystic;Carcinoma, Bronchogenic;Carcinoma, Hepatocellular;Carcinoma, Non-Small-Cell Lung;Carcinoma, Renal Cell;Carcinoma, Squamous Cell;Colonic Diseases;Colorectal Neoplasms;Colorectal Neoplasms, Hereditary Nonpolyposis;Congenital Abnormalities;Congenital, Hereditar…	(1S,6BR,9AS,11R,11BR)-9A,11B-DIMETHYL-1-(METHYLOXY)METHYL-3,6,9-TRIOXO-1,6,6B,7,8,9,9A,10,11,11B-DECAHYDRO-3H-FURO4,3,2-DEINDENO4,5-H2BENZOPYRAN-11-YL ACETATE,Caffeine,XL147,XL765	Likely pathogenic,Pathogenic,other	A=948, G=1051, T=1	A=0.474, G=0.5255, T=5.0E-4	1e-05	15092.5
	chr4:55597458	A/G	A	G	SNV	KIT	KIT : intronic : NM_000222.2	1		49.3	+		NM_000222.2	c.2142-36A>G			benign		-0.32					Immunoglobulin I-set domain,Immunoglobulin domain,Protein kinase domain,Protein tyrosine kinase	rs17084713		0.026	0.0003	0.0801	0.0274		4.964E-3 (pos.55597458)	0.0 (pos.55597458)	3.348E-3 (pos.55597458)	0.0 (pos.55597458)	0.0 (pos.55597458)	4.384E-4 (pos.55597458)	8.071E-2 (pos.55597458)	7.655E-3 (pos.55597458)		Hardy-Zuckerman 4 feline sarcoma (v-kit) oncogene	ATP binding,Fc receptor signaling pathway,Kit signaling pathway,MAPK cascade,Ras guanyl-nucleotide exchange factor activity,T cell differentiation,acrosomal vesicle,actin cytoskeleton reorganization,activation of MAPK activity,cell chemotaxis,cell-cell junction,cellular response to thyroid hormone stimulus,cytokine binding,cytokine-mediated signaling pathway,cytoplasmic side of plasma membrane,de…	Albinism;Amino Acid Metabolism, Inborn Errors;Breast Diseases;Breast Neoplasms;Bronchial Neoplasms;Carcinoma, Bronchogenic;Carcinoma, Non-Small-Cell Lung;Congenital, Hereditary, and Neonatal Diseases and Abnormalities;Digestive System Diseases;Digestive System Neoplasms;Endocrine Gland Neoplasms;Endocrine System Diseases;Eye Diseases, Hereditary;Gastrointestinal Diseases;Gastrointestinal Neoplasm…	ABT-869,Dasatinib,Imatinib,Lenvatinib,MP470,Nilotinib,OSI-930,Pazopanib,Phosphonotyrosine,Ponatinib,Regorafenib,Sorafenib,Sunitinib,XL184,XL820	Benign	A=1014, G=986	A=0.507, G=0.493	1e-05	10841.6
	chr4:55972974	T/A	T	A	SNV	KDR	KDR : exonic : NM_002253.2	1	COSM149673	49.12	-	11	NM_002253.2	c.1416A>T	p.Gln472His	missense			-0.05	0.03	24	0.003	neutral	CD80-like C2-set immunoglobulin domain,Immunoglobulin I-set domain,Immunoglobulin V-set domain,Immunoglobulin domain,Protein kinase domain,Protein tyrosine kinase	rs1870377		0.212	0.2369	0.1101	0.1939	YES	9.352E-2 (pos.55972974)	4.637E-1 (pos.55972974)	2.307E-1 (pos.55972974)	2.857E-1 (pos.55972974)	1.691E-1 (pos.55972974)	2.333E-1 (pos.55972974)	1.061E-1 (pos.55972974)	2.198E-1 (pos.55972974)	NS,acute_myeloid_leukaemia,adenocarcinoma,alveolar,diffuse_large_B_cell_lymphoma,embryonal	Kinase insert domain receptor	ATP binding,Golgi apparatus,Hsp90 protein binding,angiogenesis,calcium-mediated signaling using intracellular calcium source,cell junction,cell migration involved in sprouting angiogenesis,cellular response to vascular endothelial growth factor stimulus,early endosome,embryonic hemopoiesis,endoplasmic reticulum,endosome,endothelium development,extracellular matrix organization,extracellular regio…	Adenocarcinoma;Bone Diseases;Bone Diseases, Developmental;Brain Diseases;Brain Ischemia;Breast Diseases;Breast Neoplasms;Carcinoma;Cardiovascular Diseases;Central Nervous System Diseases;Cerebral Hemorrhage;Cerebrovascular Disorders;Colonic Diseases;Colorectal Neoplasms;Congenital, Hereditary, and Neonatal Diseases and Abnormalities;Diabetes Complications;Diabetes Mellitus;Diabetic Nephropathies;…	3-(2-aminoquinazolin-6-yl)-1-(3,3-dimethylindolin-6-yl)-4-methylpyridin-2(1H)-one,3-(2-aminoquinazolin-6-yl)-4-methyl-1-3-(trifluoromethyl)phenylpyridin-2(1H)-one,4-2-4-chloro-3-(trifluoromethyl)phenylamino-3H-benzimidazol-5-yloxy-N-methyl-pyridine-2-carboxamide,6-chloro-N-pyrimidin-5-yl-3-{3-(trifluoromethyl)phenylamino}-1,2-benzisoxazole-7-carboxamide,ABT-869,AZD2171,Axitinib,CYC116,Cabozantini…	not provided	T=1017, A=982	T=0.5088, A=0.4912	1e-05	10777.5
	chr4:55980239	C/T	C	T	SNV	KDR	KDR : intronic : NM_002253.2	1		37.8	-		NM_002253.2	c.798+54G>A					-0.3					CD80-like C2-set immunoglobulin domain,Immunoglobulin I-set domain,Immunoglobulin V-set domain,Immunoglobulin domain,Protein kinase domain,Protein tyrosine kinase	rs7692791		0.456 (ref)				YES										Kinase insert domain receptor	ATP binding,Golgi apparatus,Hsp90 protein binding,angiogenesis,calcium-mediated signaling using intracellular calcium source,cell junction,cell migration involved in sprouting angiogenesis,cellular response to vascular endothelial growth factor stimulus,early endosome,embryonic hemopoiesis,endoplasmic reticulum,endosome,endothelium development,extracellular matrix organization,extracellular regio…	Adenocarcinoma;Bone Diseases;Bone Diseases, Developmental;Brain Diseases;Brain Ischemia;Breast Diseases;Breast Neoplasms;Carcinoma;Cardiovascular Diseases;Central Nervous System Diseases;Cerebral Hemorrhage;Cerebrovascular Disorders;Colonic Diseases;Colorectal Neoplasms;Congenital, Hereditary, and Neonatal Diseases and Abnormalities;Diabetes Complications;Diabetes Mellitus;Diabetic Nephropathies;…	3-(2-aminoquinazolin-6-yl)-1-(3,3-dimethylindolin-6-yl)-4-methylpyridin-2(1H)-one,3-(2-aminoquinazolin-6-yl)-4-methyl-1-3-(trifluoromethyl)phenylpyridin-2(1H)-one,4-2-4-chloro-3-(trifluoromethyl)phenylamino-3H-benzimidazol-5-yloxy-N-methyl-pyridine-2-carboxamide,6-chloro-N-pyrimidin-5-yl-3-{3-(trifluoromethyl)phenylamino}-1,2-benzisoxazole-7-carboxamide,ABT-869,AZD2171,Axitinib,CYC116,Cabozantini…		C=1221, T=742	C=0.622, T=0.378	1e-05	7022.6
	chr5:112175651	A/G	A	G	SNV	APC	APC : exonic : NM_000038.5	1	COSM27993	48.77	+	16	NM_000038.5	c.4360A>G	p.Lys1454Glu	missense	benign/likely benign/VUS		4.02	0.06	56	0.147	Pathogenic	APC 15 residue motif,APC basic domain,APC repeat,Armadillo/beta-catenin-like repeat,EB-1 Binding Domain,SAMP Motif	rs111866410		0.001	0	0.0073	0.0025		6.056E-4 (pos.112175651)	0.0 (pos.112175651)	0.0 (pos.112175651)	1.513E-4 (pos.112175651)	0.0 (pos.112175651)	1.499E-5 (pos.112175651)	5.387E-3 (pos.112175651)	5.358E-4 (pos.112175651)	NS,adenocarcinoma,diffuse_large_B_cell_lymphoma	Adenomatous polyposis coli	Wnt signaling pathway,Wnt signalosome,axonal growth cone,beta-catenin binding,beta-catenin destruction complex,beta-catenin destruction complex assembly,beta-catenin destruction complex disassembly,bicellular tight junction,bicellular tight junction assembly,cadherin binding,canonical Wnt signaling pathway,catenin complex,cell adhesion,cell body fiber,cell cortex,cell cycle arrest,cell fate speci…	Aberrant Crypt Foci;Abnormalities, Multiple;Adenocarcinoma;Adenoma;Adenomatous Polyposis Coli;Adenomatous Polyps;Astrocytoma;Autistic Disorder;Bronchial Neoplasms;Carcinogenesis;Carcinoma;Carcinoma, Bronchogenic;Carcinoma, Hepatocellular;Carcinoma, Non-Small-Cell Lung;Cell Transformation, Neoplastic;Child Development Disorders, Pervasive;Colonic Diseases;Colonic Neoplasms;Colorectal Neoplasms;Col…		Benign,Likely benign,Uncertain significance	A=918, G=874	A=0.5123, G=0.4877	1e-05	11957.9
	chr5:149433595	G/G	GT	G	INDEL	CSF1R,HMGXB3	CSF1R : utr_3 : NM_005211.3, HMGXB3 : downstream : NM_014983.2	1		100	+, -		NM_014983.2, NM_005211.3	c.*37delA					0.04,0.82					Immunoglobulin domain,Protein kinase domain,Protein tyrosine kinase	rs2066934,rs35308019,rs386693509		0.203				YES	7.768E-1 (pos.149433596)	7.267E-1 (pos.149433596)	7.465E-1 (pos.149433596)	8.023E-1 (pos.149433596)	6.889E-1 (pos.149433596)	7.733E-1 (pos.149433596)	9.482E-1 (pos.149433596)	7.754E-1 (pos.149433596)		Colony-stimulating factor-1 receptor; oncogene FMS (McDonough feline sarcoma)	ATP binding,CSF1-CSF1R complex,DNA binding,axon guidance,biological_process,cell proliferation,cell surface,cell-cell junction maintenance,cellular response to cytokine stimulus,cellular response to macrophage colony-stimulating factor stimulus,cellular_component,cytokine binding,cytokine-mediated signaling pathway,forebrain neuron differentiation,hemopoiesis,inflammatory response,innate immune r…	Autoimmune Diseases;Brain Diseases;Breast Diseases;Breast Neoplasms;Central Nervous System Diseases;Female Urogenital Diseases;Female Urogenital Diseases and Pregnancy Complications;Glomerulonephritis;Glomerulonephritis, IGA;Immune System Diseases;Kidney Diseases;Leukemia;Leukemia, Myeloid;Leukemia, Myeloid, Acute;Leukoencephalopathies;Male Urogenital Diseases;Neoplasm Metastasis;Neoplasms;Neopla…	5-CYANO-FURAN-2-CARBOXYLIC ACID 5-HYDROXYMETHYL-2-(4-METHYL-PIPERIDIN-1-YL)-PHENYL-AMIDE,6-CHLORO-3-(3-METHYLISOXAZOL-5-YL)-4-PHENYLQUINOLIN-2(1H)-ONE,ABT-869,Imatinib,Sunitinib		GT=0, G=688	GT=0.0, G=1.0	1e-05	11639.9
	chr5:149433597	GA/GA	G	GA	INDEL	CSF1R,HMGXB3	CSF1R : utr_3 : NM_005211.3, HMGXB3 : downstream : NM_014983.2	1		99.85	+, -		NM_014983.2, NM_005211.3	c.*35insT					-0.26					Immunoglobulin domain,Protein kinase domain,Protein tyrosine kinase	rs2066933,rs386693509		0.204 (ref)	0.4213	0.3584	0.4959	YES	7.757E-1 (pos.149433597)	7.198E-1 (pos.149433597)	7.453E-1 (pos.149433597)	8.016E-1 (pos.149433597)	6.887E-1 (pos.149433597)	7.73E-1 (pos.149433597)	9.483E-1 (pos.149433597)	7.745E-1 (pos.149433597)		Colony-stimulating factor-1 receptor; oncogene FMS (McDonough feline sarcoma)	ATP binding,CSF1-CSF1R complex,DNA binding,axon guidance,biological_process,cell proliferation,cell surface,cell-cell junction maintenance,cellular response to cytokine stimulus,cellular response to macrophage colony-stimulating factor stimulus,cellular_component,cytokine binding,cytokine-mediated signaling pathway,forebrain neuron differentiation,hemopoiesis,inflammatory response,innate immune r…	Autoimmune Diseases;Brain Diseases;Breast Diseases;Breast Neoplasms;Central Nervous System Diseases;Female Urogenital Diseases;Female Urogenital Diseases and Pregnancy Complications;Glomerulonephritis;Glomerulonephritis, IGA;Immune System Diseases;Kidney Diseases;Leukemia;Leukemia, Myeloid;Leukemia, Myeloid, Acute;Leukoencephalopathies;Male Urogenital Diseases;Neoplasm Metastasis;Neoplasms;Neopla…	5-CYANO-FURAN-2-CARBOXYLIC ACID 5-HYDROXYMETHYL-2-(4-METHYL-PIPERIDIN-1-YL)-PHENYL-AMIDE,6-CHLORO-3-(3-METHYLISOXAZOL-5-YL)-4-PHENYLQUINOLIN-2(1H)-ONE,ABT-869,Imatinib,Sunitinib		G=1, GA=685	G=0.0015, GA=0.9985	1e-05	8822.52
	chr7:140453136	ACT/TCT	ACT	CCT,CTC,CTT,GCT,TCT,TGT,TTT	SNV	BRAF	BRAF : exonic : NM_004333.4	1	COSM476	CCT=0.25, CTC=0.00, CTT=0.00, GCT=0.10, TCT=62.78, TGT=0.00, TTT=0.00	-	15	NM_004333.4	c.*35insT	p.Val600Glu	missense	pathogenic		9.2,7.71,2.6	0	121	0.971	Pathogenic	Phorbol esters/diacylglycerol binding domain (C1 domain),Protein kinase domain,Protein tyrosine kinase,Raf-like Ras-binding domain	rs113488022							8.715E-5 (pos.140453136)	0.0 (pos.140453136)	0.0 (pos.140453136)	0.0 (pos.140453136)	6.06E-5 (pos.140453136)	0.0 (pos.140453136)	0.0 (pos.140453136)	1.65E-5 (pos.140453136)	B_cell_lymphoma_unspecified,B_cell_prolymphocytic_leukaemia,Hashimotos_thyroiditis,Hurthle_cell_carcinoma,Langerhans_cell_histiocytosis,Langerhans_cell_sarcoma,NS,Spitz,acinar_adenocarcinoma,acinar_carcinoma,acral_lentiginous,acute_myeloid_leukaemia,acute_myeloid_leukaemia_therapy_related,adamantinomatous,adenocarcinoma,adenoid_cystic_carcinoma,adenoma,admixed_hyperplastic_polyp-adenoma,amelanoti…	Murine sarcoma viral (v-raf) oncogene homolog B1	ATP binding,CD4-positive, alpha-beta T cell differentiation,MAP kinase kinase kinase activity,MAPK cascade,activation of MAPKK activity,animal organ morphogenesis,calcium ion binding,cell body,cellular response to calcium ion,cellular response to drug,cytoplasm,cytosol,establishment of protein localization to membrane,face development,glucose transport,head morphogenesis,identical protein binding…	Abnormalities, Multiple;Adenocarcinoma;Adenocarcinoma, Follicular;Adrenal Cortex Diseases;Adrenal Cortex Neoplasms;Adrenal Gland Diseases;Adrenal Gland Neoplasms;Adrenocortical Carcinoma;Ameloblastoma;Astrocytoma;Bone Diseases;Bone Neoplasms;Bronchial Neoplasms;Carcinogenesis;Carcinoma;Carcinoma, Bronchogenic;Carcinoma, Non-Small-Cell Lung;Cardiovascular Abnormalities;Cardiovascular Diseases;Colo…	(1E)-5-(1-piperidin-4-yl-3-pyridin-4-yl-1H-pyrazol-4-yl)-2,3-dihydro-1H-inden-1-one oxime,Dabrafenib,N-{2,4-difluoro-3-(5-pyridin-3-yl-1H-pyrrolo2,3-bpyridin-3-yl)carbonylphenyl}ethanesulfonamide,N-{3-(5-chloro-1H-pyrrolo2,3-bpyridin-3-yl)carbonyl-2,4-difluorophenyl}propane-1-sulfonamide,PLX4032,Regorafenib,Sorafenib,Vemurafenib,XL281	Likely pathogenic,Pathogenic	ACT=736, CCT=5, CTC=0, CTT=0, GCT=2, TCT=1253, TGT=0, TTT=0	ACT=0.3687, CCT=0.0025, CTC=0.0, CTT=0.0, GCT=0.001, TCT=0.6278, TGT=0.0, TTT=0.0	1e-05	19508.6
	chr9:133738378	G/A	G	A	SNV	ABL1	ABL1 : exonic : NM_005157.5	1		3.32	+	4	NM_005157.5	c.778G>A	p.Val260Met	missense			7.83		21	0.988		Protein kinase domain,Protein tyrosine kinase,SH2 domain,SH3 domain,Variant SH3 domain	rs772834697							0.0 (pos.133738378)	0.0 (pos.133738378)	0.0 (pos.133738378)	0.0 (pos.133738378)	0.0 (pos.133738378)	1.511E-5 (pos.133738378)	0.0 (pos.133738378)	8.356E-6 (pos.133738378)		Abelson murine leukemia viral (v-abl) oncogene homolog 1	ATP binding,B cell proliferation involved in immune response,B cell receptor signaling pathway,B-1 B cell homeostasis,Bergmann glial cell differentiation,DNA binding,DNA damage induced protein phosphorylation,Fc-gamma receptor signaling pathway involved in phagocytosis,SH3 domain binding,actin cytoskeleton,actin cytoskeleton organization,actin filament binding,actin filament branching,actin monom…	Adenocarcinoma;Bone Marrow Diseases;Breast Diseases;Breast Neoplasms;Carcinogenesis;Carcinoma;Digestive System Diseases;Digestive System Neoplasms;Esophageal Diseases;Esophageal Neoplasms;Gastrointestinal Diseases;Gastrointestinal Neoplasms;Head and Neck Neoplasms;Hematologic Diseases;Hemic and Lymphatic Diseases;Immune System Diseases;Immunoproliferative Disorders;Leukemia;Leukemia, Lymphoid;Leu…	1-4-(PYRIDIN-4-YLOXY)PHENYL-3-3-(TRIFLUOROMETHYL)PHENYLUREA,2-amino-5-3-(1-ethyl-1H-pyrazol-5-yl)-1H-pyrrolo2,3-bpyridin-5-yl-N,N-dimethylbenzamide,2-{(6-OXO-1,6-DIHYDROPYRIDIN-3-YL)METHYLAMINO}-N-4-PROPYL-3-(TRIFLUOROMETHYL)PHENYLBENZAMIDE,5-3-(2-METHOXYPHENYL)-1H-PYRROLO2,3-BPYRIDIN-5-YL-N,N-DIMETHYLPYRIDINE-3-CARBOXAMIDE,6-(2,6-DICHLOROPHENYL)-2-{3-(HYDROXYMETHYL)PHENYLAMINO}-8-METHYLPYRIDO2,3…		G=1107, A=38	G=0.9668, A=0.0332	0.00127	28.9493
	chr13:28610183	A/G	A	G	SNV	FLT3	FLT3 : intronic : NM_004119.2	1		50.55	-		NM_004119.2	c.1310-3T>C					1.33				neutral	Immunoglobulin domain,Protein kinase domain,Protein tyrosine kinase	rs2491231		0.437 (ref)	0.2179	0.293	0.3836	YES	7.186E-1 (pos.28610183)	7.435E-1 (pos.28610183)	7.02E-1 (pos.28610183)	7.989E-1 (pos.28610183)	6.013E-1 (pos.28610183)	7.702E-1 (pos.28610183)	2.756E-1 (pos.28610183)	6.993E-1 (pos.28610183)	NS,acute_myeloid_leukaemia	fms-related tyrosine kinase-3	ATP binding,B cell differentiation,animal organ regeneration,cellular response to cytokine stimulus,cellular response to glucocorticoid stimulus,common myeloid progenitor cell proliferation,cytokine receptor activity,cytokine-mediated signaling pathway,cytosol,dendritic cell differentiation,endoplasmic reticulum lumen,glucocorticoid receptor binding,hemopoiesis,integral component of plasma membra…	Cardiovascular Diseases;Embolism and Thrombosis;Hematologic Diseases;Hemic and Lymphatic Diseases;Immune System Diseases;Immunoproliferative Disorders;Leukemia;Leukemia, Biphenotypic, Acute;Leukemia, Lymphoid;Leukemia, Myeloid;Leukemia, Myeloid, Acute;Leukemia, Promyelocytic, Acute;Lymphatic Diseases;Lymphoproliferative Disorders;Neoplasms;Neoplasms by Histologic Type;Thrombosis;Vascular Diseases	ABT-869,AC220,MLN-518,MP470,Nintedanib,Ponatinib,Sorafenib,Sunitinib,XL999		A=988, G=1010	A=0.4945, G=0.5055	1e-05	11251.9
	chr17:7579472	G/C	G	C,T	SNV	TP53	TP53 : exonic : NM_000546.5	1	COSM250061	C=50.75, T=0.17	-	4	NM_000546.5	c.215C>G	p.Pro72Arg	missense	benign	https://www.pharmgkb.org/variant/PA166155173/variantAnnotation	1.02	0.6	103	neutral	0.219,0.361	P53 DNA-binding domain,P53 tetramerisation motif	rs1042522		0.457 (ref)	0.2548	0.4051	0.37	YES	7.115E-1 (pos.7579472)	5.892E-1 (pos.7579472)	6.648E-1 (pos.7579472)	7.304E-1 (pos.7579472)	4.988E-1 (pos.7579472)	7.345E-1 (pos.7579472)	3.842E-1 (pos.7579472)	6.6E-1 (pos.7579472)	NS,adenocarcinoma,astrocytoma_Grade_IV,ductal_carcinoma,epithelial,hepatocellular_carcinoma,other,squamous_cell_carcinoma	Tumor protein p53	ATP binding,DNA binding,DNA damage response, signal transduction by p53 class mediator,DNA damage response, signal transduction by p53 class mediator resulting in cell cycle arrest,DNA damage response, signal transduction by p53 class mediator resulting in transcription of p21 class mediator,DNA strand renaturation,ER overload response,PML body,RNA polymerase II transcription factor activity, seq…	Acute Kidney Injury;Adenocarcinoma;Adenocarcinoma, Clear Cell;Adenoma;Adnexal Diseases;Adrenal Cortex Diseases;Adrenal Cortex Neoplasms;Adrenal Gland Diseases;Adrenal Gland Neoplasms;Adrenocortical Carcinoma;Amyotrophic Lateral Sclerosis;Aortic Stenosis, Subvalvular;Aortic Valve Stenosis;Arsenic Poisoning;Astrocytoma;Balkan Nephropathy;Biliary Tract Diseases;Biliary Tract Neoplasms;Blood Coagulat…	1-(9-ethyl-9H-carbazol-3-yl)-N-methylmethanamine,AZD 3355,Acetylsalicylic acid	Benign,Uncertain significance,drug response	G=293, C=303, T=1	G=0.4908, C=0.5075, T=0.0017	1e-05	4307.95
	chr19:3118933	TG/T	TG	T	INDEL	GNA11	GNA11 : exonic : NM_002067.4	1		26.21	+	5	NM_002067.4	c.623delG	p.Gly208fs	frameshiftDeletion			7.85,-0.24					G-protein alpha subunit								0.0 (pos.3118934)	0.0 (pos.3118934)	0.0 (pos.3118934)	0.0 (pos.3118934)	6.057E-5 (pos.3118934)	0.0 (pos.3118934)	0.0 (pos.3118934)	8.268E-6 (pos.3118934)	adenocarcinoma	Guanine nucleotide-binding protein, Gq class, GNA11	G-protein beta/gamma-subunit complex binding,G-protein coupled acetylcholine receptor signaling pathway,GTP binding,GTPase activity,action potential,cellular response to pH,cytoplasm,developmental pigmentation,entrainment of circadian clock,extracellular exosome,heart development,lysosomal membrane,metal ion binding,phospholipase C-activating dopamine receptor signaling pathway,photoreceptor oute…	Cardiovascular Abnormalities;Cardiovascular Diseases;Congenital Abnormalities;Congenital, Hereditary, and Neonatal Diseases and Abnormalities;Heart Defects, Congenital;Heart Diseases;Melanoma;Neoplasms;Neoplasms by Histologic Type;Neoplasms, Germ Cell and Embryonal;Neoplasms, Nerve Tissue;Neuroectodermal Tumors;Neuroendocrine Tumors;Nevi and Melanomas			TG=1081, T=384	TG=0.7379, T=0.2621	1e-05	1536.16
HCT Control	chr1:43814994	T/A	T	A	SNV	MPL	MPL : exonic : NM_005373.2	1		5.72	+	10	NM_005373.2	c.1529T>A	p.Leu510Gln	missense			2.46	0	113	0.716	0.769																	myelofibrosis	Myeloproliferative leukemia virus, homolog of	Golgi apparatus,cell proliferation,cell surface,cell surface receptor signaling pathway,integral component of plasma membrane,plasma membrane,protein binding,thrombopoietin receptor activity,thrombopoietin-mediated signaling pathway,transmembrane signaling receptor activity	Blood Coagulation Disorders;Blood Platelet Disorders;Bone Marrow Diseases;Glioma;Hematologic Diseases;Hemic and Lymphatic Diseases;Hemorrhagic Disorders;Medulloblastoma;Myeloproliferative Disorders;Neoplasms;Neoplasms by Histologic Type;Neoplasms, Germ Cell and Embryonal;Neoplasms, Glandular and Epithelial;Neoplasms, Nerve Tissue;Neoplasms, Neuroepithelial;Neuroectodermal Tumors;Neuroectodermal T…	Eltrombopag,Romiplostim,SB-559448		T=1861, A=113	T=0.9428, A=0.0572	1e-05	218.822
	chr2:212812097	C/C	T	C	SNV	ERBB4	ERBB4 : intronic : NM_005235.2	1		99.9	-		NM_005235.2	c.421+58A>G					-3.34					Furin-like cysteine rich region,Protein kinase domain,Protein tyrosine kinase,Receptor L domain	rs839541		0.355				YES										Avian erythroblastic leukemia viral (v-erb-b2) oncogene homolog 4	ATP binding,ERBB2 signaling pathway,MAPK cascade,Ras guanyl-nucleotide exchange factor activity,basolateral plasma membrane,cardiac muscle tissue regeneration,cell fate commitment,cell migration,cell proliferation,central nervous system morphogenesis,cytosol,embryonic pattern specification,epidermal growth factor receptor binding,extracellular region,heart development,integral component of membra…	Amyotrophic Lateral Sclerosis;Asthma;Biliary Tract Diseases;Biliary Tract Neoplasms;Brain Diseases;Breast Diseases;Breast Neoplasms;Bronchial Diseases;Cardiovascular Diseases;Central Nervous System Diseases;Diabetes Complications;Diabetes Mellitus;Diabetic Nephropathies;Digestive System Diseases;Digestive System Neoplasms;Endocrine System Diseases;Female Urogenital Diseases;Female Urogenital Dise…	Afatinib		T=2, C=1996	T=0.001, C=0.999	1e-05	33829.9
	chr3:41266133	CCTT/C	CCTT	C,GCTT,TCTT	INDEL	CTNNB1	CTNNB1 : exonic : NM_001904.3	3	COSM6128	C=33.57, GCTT=0.00, TCTT=0.00	+	3	NM_001904.3	c.133_135delTCT	p.Ser45del	nonframeshiftDeletion	pathogenic		7.82,7.82,-0.24,8.04				0.977,0.981	Armadillo/beta-catenin-like repeat	rs121913407															NS,adenocarcinoma,aldosterone_producing,anaplastic_carcinoma,cortisol_producing,functioning,hepatocellular_carcinoma,non_functioning	Catenin (cadherin-associated protein), beta 1, 88kD	I-SMAD binding,RNA polymerase II activating transcription factor binding,RNA polymerase II transcription factor binding,SMAD binding,Schwann cell proliferation,Scrib-APC-beta-catenin complex,T cell differentiation in thymus,Wnt signaling pathway,Wnt signaling pathway, calcium modulating pathway,Wnt signalosome,Z disc,adherens junction,adherens junction assembly,alpha-catenin binding,androgen rece…	Aberrant Crypt Foci;Adenocarcinoma;Adenoma;Adenoma, Liver Cell;Adnexal Diseases;Adrenal Cortex Diseases;Adrenal Cortex Neoplasms;Adrenal Gland Diseases;Adrenal Gland Neoplasms;Adrenocortical Carcinoma;Breast Diseases;Breast Neoplasms;Carcinoma;Carcinoma, Hepatocellular;Cardiovascular Diseases;Cecal Diseases;Cecal Neoplasms;Colonic Diseases;Colonic Neoplasms;Colorectal Neoplasms;Congenital Abnorma…	Urea	Pathogenic	CCTT=835, C=422, GCTT=0, TCTT=0	CCTT=0.6643, C=0.3357, GCTT=0.0, TCTT=0.0	1e-05	4963.46
	chr3:178952085	A/G	A	G,T	SNV	PIK3CA	PIK3CA : exonic : NM_006218.3	1	COSM775	G=44.94, T=0.10	+	21	NM_006218.3	c.3140A>G	p.His1047Arg	missense	pathogenic		8.86		29	0.639	Pathogenic	PI3-kinase family, p85-binding domain,PI3-kinase family, ras-binding domain,Phosphatidylinositol 3- and 4-kinase,Phosphoinositide 3-kinase C2,Phosphoinositide 3-kinase family, accessory domain (PIK domain)	rs121913279							0.0;0.0 (pos.178952085)	0.0;0.0 (pos.178952085)	0.0;0.0 (pos.178952085)	0.0;0.0 (pos.178952085)	0.0;0.0 (pos.178952085)	1.505E-5;1.505E-5 (pos.178952085)	0.0;0.0 (pos.178952085)	8.317E-6;8.317E-6 (pos.178952085)	Brenner_tumour,CLOVES_syndrome,ER-HER-positive_carcinoma,ER-PR-HER-positive_carcinoma,ER-PR-positive_carcinoma,ER-positive_carcinoma,HER-positive_carcinoma,Hurthle_cell_carcinoma,Merkel_cell_carcinoma,NS,SHH_subtype,acinic_cell_carcinoma,adenocarcinoma,adenoid_cystic_carcinoma,adenoma,alveolar,anaplastic_carcinoma,astrocytoma_Grade_III,astrocytoma_Grade_IV,atypical,basal_(triple-negative)_carcino…	Phosphatidylinositol 3-kinase, catalytic, alpha polypeptide	1-phosphatidylinositol-3-kinase activity,1-phosphatidylinositol-4-phosphate 3-kinase activity,ATP binding,ERBB2 signaling pathway,Fc-epsilon receptor signaling pathway,Fc-gamma receptor signaling pathway involved in phagocytosis,T cell costimulation,T cell receptor signaling pathway,activation of protein kinase activity,adipose tissue development,angiogenesis,cardiac muscle contraction,cellular r…	Adenocarcinoma;Adnexal Diseases;Autoimmune Diseases;Breast Diseases;Breast Neoplasms;Bronchial Neoplasms;Carcinoma;Carcinoma, Adenoid Cystic;Carcinoma, Bronchogenic;Carcinoma, Hepatocellular;Carcinoma, Non-Small-Cell Lung;Carcinoma, Renal Cell;Carcinoma, Squamous Cell;Colonic Diseases;Colorectal Neoplasms;Colorectal Neoplasms, Hereditary Nonpolyposis;Congenital Abnormalities;Congenital, Hereditar…	(1S,6BR,9AS,11R,11BR)-9A,11B-DIMETHYL-1-(METHYLOXY)METHYL-3,6,9-TRIOXO-1,6,6B,7,8,9,9A,10,11,11B-DECAHYDRO-3H-FURO4,3,2-DEINDENO4,5-H2BENZOPYRAN-11-YL ACETATE,Caffeine,XL147,XL765	Likely pathogenic,Pathogenic,other	A=1098, G=898, T=2	A=0.5495, G=0.4494, T=0.001	1e-05	12095.8
	chr3:178952141	G/A	G	A	SNV	PIK3CA	PIK3CA : exonic : NM_006218.3	1	COSM6941468	3.41	+	21	NM_006218.3	c.3196G>A	p.Ala1066Thr	missense			7.4		58	0.141	Pathogenic	PI3-kinase family, p85-binding domain,PI3-kinase family, ras-binding domain,Phosphatidylinositol 3- and 4-kinase,Phosphoinositide 3-kinase C2,Phosphoinositide 3-kinase family, accessory domain (PIK domain)																luminal_NS_carcinoma,squamous_cell_carcinoma	Phosphatidylinositol 3-kinase, catalytic, alpha polypeptide	1-phosphatidylinositol-3-kinase activity,1-phosphatidylinositol-4-phosphate 3-kinase activity,ATP binding,ERBB2 signaling pathway,Fc-epsilon receptor signaling pathway,Fc-gamma receptor signaling pathway involved in phagocytosis,T cell costimulation,T cell receptor signaling pathway,activation of protein kinase activity,adipose tissue development,angiogenesis,cardiac muscle contraction,cellular r…	Adenocarcinoma;Adnexal Diseases;Autoimmune Diseases;Breast Diseases;Breast Neoplasms;Bronchial Neoplasms;Carcinoma;Carcinoma, Adenoid Cystic;Carcinoma, Bronchogenic;Carcinoma, Hepatocellular;Carcinoma, Non-Small-Cell Lung;Carcinoma, Renal Cell;Carcinoma, Squamous Cell;Colonic Diseases;Colorectal Neoplasms;Colorectal Neoplasms, Hereditary Nonpolyposis;Congenital Abnormalities;Congenital, Hereditar…	(1S,6BR,9AS,11R,11BR)-9A,11B-DIMETHYL-1-(METHYLOXY)METHYL-3,6,9-TRIOXO-1,6,6B,7,8,9,9A,10,11,11B-DECAHYDRO-3H-FURO4,3,2-DEINDENO4,5-H2BENZOPYRAN-11-YL ACETATE,Caffeine,XL147,XL765		G=1929, A=68	G=0.9659, A=0.0341	2e-05	47.9336
	chr4:55593679	G/A	G	A	SNV	KIT	KIT : exonic : NM_000222.2	1	COSM36305	1.7	+	11	NM_000222.2	c.1745G>A	p.Trp582Ter	nonsense			9.67				Pathogenic	Immunoglobulin I-set domain,Immunoglobulin domain,Protein kinase domain,Protein tyrosine kinase																NS,other,papillary_carcinoma,sebaceous_carcinoma	Hardy-Zuckerman 4 feline sarcoma (v-kit) oncogene	ATP binding,Fc receptor signaling pathway,Kit signaling pathway,MAPK cascade,Ras guanyl-nucleotide exchange factor activity,T cell differentiation,acrosomal vesicle,actin cytoskeleton reorganization,activation of MAPK activity,cell chemotaxis,cell-cell junction,cellular response to thyroid hormone stimulus,cytokine binding,cytokine-mediated signaling pathway,cytoplasmic side of plasma membrane,de…	Albinism;Amino Acid Metabolism, Inborn Errors;Breast Diseases;Breast Neoplasms;Bronchial Neoplasms;Carcinoma, Bronchogenic;Carcinoma, Non-Small-Cell Lung;Congenital, Hereditary, and Neonatal Diseases and Abnormalities;Digestive System Diseases;Digestive System Neoplasms;Endocrine Gland Neoplasms;Endocrine System Diseases;Eye Diseases, Hereditary;Gastrointestinal Diseases;Gastrointestinal Neoplasm…	ABT-869,Dasatinib,Imatinib,Lenvatinib,MP470,Nilotinib,OSI-930,Pazopanib,Phosphonotyrosine,Ponatinib,Regorafenib,Sorafenib,Sunitinib,XL184,XL820		G=1965, A=34	G=0.983, A=0.017	0.00148	28.3119
	chr4:55946354	G/T	G	T	SNV	KDR	KDR : intronic : NM_002253.2	1		49.75	-		NM_002253.2	c.3849-24C>A					1.73					CD80-like C2-set immunoglobulin domain,Immunoglobulin I-set domain,Immunoglobulin V-set domain,Immunoglobulin domain,Protein kinase domain,Protein tyrosine kinase	rs10006115		0.072	0.0365	0.0788	0.0508	YES	2.476E-2 (pos.55946354)	9.641E-2 (pos.55946354)	6.541E-2 (pos.55946354)	3.674E-2 (pos.55946354)	7.998E-2 (pos.55946354)	4.085E-2 (pos.55946354)	8.512E-2 (pos.55946354)	5.236E-2 (pos.55946354)		Kinase insert domain receptor	ATP binding,Golgi apparatus,Hsp90 protein binding,angiogenesis,calcium-mediated signaling using intracellular calcium source,cell junction,cell migration involved in sprouting angiogenesis,cellular response to vascular endothelial growth factor stimulus,early endosome,embryonic hemopoiesis,endoplasmic reticulum,endosome,endothelium development,extracellular matrix organization,extracellular regio…	Adenocarcinoma;Bone Diseases;Bone Diseases, Developmental;Brain Diseases;Brain Ischemia;Breast Diseases;Breast Neoplasms;Carcinoma;Cardiovascular Diseases;Central Nervous System Diseases;Cerebral Hemorrhage;Cerebrovascular Disorders;Colonic Diseases;Colorectal Neoplasms;Congenital, Hereditary, and Neonatal Diseases and Abnormalities;Diabetes Complications;Diabetes Mellitus;Diabetic Nephropathies;…	3-(2-aminoquinazolin-6-yl)-1-(3,3-dimethylindolin-6-yl)-4-methylpyridin-2(1H)-one,3-(2-aminoquinazolin-6-yl)-4-methyl-1-3-(trifluoromethyl)phenylpyridin-2(1H)-one,4-2-4-chloro-3-(trifluoromethyl)phenylamino-3H-benzimidazol-5-yloxy-N-methyl-pyridine-2-carboxamide,6-chloro-N-pyrimidin-5-yl-3-{3-(trifluoromethyl)phenylamino}-1,2-benzisoxazole-7-carboxamide,ABT-869,AZD2171,Axitinib,CYC116,Cabozantini…		G=1005, T=995	G=0.5025, T=0.4975	1e-05	10986.6
	chr4:55972974	T/A	T	A	SNV	KDR	KDR : exonic : NM_002253.2	1	COSM149673	50.3	-	11	NM_002253.2	c.1416A>T	p.Gln472His	missense			-0.05	0.03	24	0.003	neutral	CD80-like C2-set immunoglobulin domain,Immunoglobulin I-set domain,Immunoglobulin V-set domain,Immunoglobulin domain,Protein kinase domain,Protein tyrosine kinase	rs1870377		0.212	0.2369	0.1101	0.1939	YES	9.352E-2 (pos.55972974)	4.637E-1 (pos.55972974)	2.307E-1 (pos.55972974)	2.857E-1 (pos.55972974)	1.691E-1 (pos.55972974)	2.333E-1 (pos.55972974)	1.061E-1 (pos.55972974)	2.198E-1 (pos.55972974)	NS,acute_myeloid_leukaemia,adenocarcinoma,alveolar,diffuse_large_B_cell_lymphoma,embryonal	Kinase insert domain receptor	ATP binding,Golgi apparatus,Hsp90 protein binding,angiogenesis,calcium-mediated signaling using intracellular calcium source,cell junction,cell migration involved in sprouting angiogenesis,cellular response to vascular endothelial growth factor stimulus,early endosome,embryonic hemopoiesis,endoplasmic reticulum,endosome,endothelium development,extracellular matrix organization,extracellular regio…	Adenocarcinoma;Bone Diseases;Bone Diseases, Developmental;Brain Diseases;Brain Ischemia;Breast Diseases;Breast Neoplasms;Carcinoma;Cardiovascular Diseases;Central Nervous System Diseases;Cerebral Hemorrhage;Cerebrovascular Disorders;Colonic Diseases;Colorectal Neoplasms;Congenital, Hereditary, and Neonatal Diseases and Abnormalities;Diabetes Complications;Diabetes Mellitus;Diabetic Nephropathies;…	3-(2-aminoquinazolin-6-yl)-1-(3,3-dimethylindolin-6-yl)-4-methylpyridin-2(1H)-one,3-(2-aminoquinazolin-6-yl)-4-methyl-1-3-(trifluoromethyl)phenylpyridin-2(1H)-one,4-2-4-chloro-3-(trifluoromethyl)phenylamino-3H-benzimidazol-5-yloxy-N-methyl-pyridine-2-carboxamide,6-chloro-N-pyrimidin-5-yl-3-{3-(trifluoromethyl)phenylamino}-1,2-benzisoxazole-7-carboxamide,ABT-869,AZD2171,Axitinib,CYC116,Cabozantini…	not provided	T=992, A=1004	T=0.497, A=0.503	1e-05	11138.5
	chr4:55980239	T/T	C	T	SNV	KDR	KDR : intronic : NM_002253.2	1		99.73	-		NM_002253.2	c.798+54G>A					-0.3					CD80-like C2-set immunoglobulin domain,Immunoglobulin I-set domain,Immunoglobulin V-set domain,Immunoglobulin domain,Protein kinase domain,Protein tyrosine kinase	rs7692791		0.456 (ref)				YES										Kinase insert domain receptor	ATP binding,Golgi apparatus,Hsp90 protein binding,angiogenesis,calcium-mediated signaling using intracellular calcium source,cell junction,cell migration involved in sprouting angiogenesis,cellular response to vascular endothelial growth factor stimulus,early endosome,embryonic hemopoiesis,endoplasmic reticulum,endosome,endothelium development,extracellular matrix organization,extracellular regio…	Adenocarcinoma;Bone Diseases;Bone Diseases, Developmental;Brain Diseases;Brain Ischemia;Breast Diseases;Breast Neoplasms;Carcinoma;Cardiovascular Diseases;Central Nervous System Diseases;Cerebral Hemorrhage;Cerebrovascular Disorders;Colonic Diseases;Colorectal Neoplasms;Congenital, Hereditary, and Neonatal Diseases and Abnormalities;Diabetes Complications;Diabetes Mellitus;Diabetic Nephropathies;…	3-(2-aminoquinazolin-6-yl)-1-(3,3-dimethylindolin-6-yl)-4-methylpyridin-2(1H)-one,3-(2-aminoquinazolin-6-yl)-4-methyl-1-3-(trifluoromethyl)phenylpyridin-2(1H)-one,4-2-4-chloro-3-(trifluoromethyl)phenylamino-3H-benzimidazol-5-yloxy-N-methyl-pyridine-2-carboxamide,6-chloro-N-pyrimidin-5-yl-3-{3-(trifluoromethyl)phenylamino}-1,2-benzisoxazole-7-carboxamide,ABT-869,AZD2171,Axitinib,CYC116,Cabozantini…		C=5, T=1870	C=0.0027, T=0.9973	1e-05	31486.2
	chr5:149433595	G/G	GT	G	INDEL	CSF1R,HMGXB3	CSF1R : utr_3 : NM_005211.3, HMGXB3 : downstream : NM_014983.2	1		99.84	+, -		NM_014983.2, NM_005211.3	c.*37delA					0.04,0.82					Immunoglobulin domain,Protein kinase domain,Protein tyrosine kinase	rs2066934,rs35308019,rs386693509		0.203				YES	7.768E-1 (pos.149433596)	7.267E-1 (pos.149433596)	7.465E-1 (pos.149433596)	8.023E-1 (pos.149433596)	6.889E-1 (pos.149433596)	7.733E-1 (pos.149433596)	9.482E-1 (pos.149433596)	7.754E-1 (pos.149433596)		Colony-stimulating factor-1 receptor; oncogene FMS (McDonough feline sarcoma)	ATP binding,CSF1-CSF1R complex,DNA binding,axon guidance,biological_process,cell proliferation,cell surface,cell-cell junction maintenance,cellular response to cytokine stimulus,cellular response to macrophage colony-stimulating factor stimulus,cellular_component,cytokine binding,cytokine-mediated signaling pathway,forebrain neuron differentiation,hemopoiesis,inflammatory response,innate immune r…	Autoimmune Diseases;Brain Diseases;Breast Diseases;Breast Neoplasms;Central Nervous System Diseases;Female Urogenital Diseases;Female Urogenital Diseases and Pregnancy Complications;Glomerulonephritis;Glomerulonephritis, IGA;Immune System Diseases;Kidney Diseases;Leukemia;Leukemia, Myeloid;Leukemia, Myeloid, Acute;Leukoencephalopathies;Male Urogenital Diseases;Neoplasm Metastasis;Neoplasms;Neopla…	5-CYANO-FURAN-2-CARBOXYLIC ACID 5-HYDROXYMETHYL-2-(4-METHYL-PIPERIDIN-1-YL)-PHENYL-AMIDE,6-CHLORO-3-(3-METHYLISOXAZOL-5-YL)-4-PHENYLQUINOLIN-2(1H)-ONE,ABT-869,Imatinib,Sunitinib		GT=1, G=636	GT=0.0016, G=0.9984	1e-05	10744.9
	chr5:149433597	GA/GA	G	GA	INDEL	CSF1R,HMGXB3	CSF1R : utr_3 : NM_005211.3, HMGXB3 : downstream : NM_014983.2	1		99.38	+, -		NM_014983.2, NM_005211.3	c.*35insT					-0.26					Immunoglobulin domain,Protein kinase domain,Protein tyrosine kinase	rs2066933,rs386693509		0.204 (ref)	0.4213	0.3584	0.4959	YES	7.757E-1 (pos.149433597)	7.198E-1 (pos.149433597)	7.453E-1 (pos.149433597)	8.016E-1 (pos.149433597)	6.887E-1 (pos.149433597)	7.73E-1 (pos.149433597)	9.483E-1 (pos.149433597)	7.745E-1 (pos.149433597)		Colony-stimulating factor-1 receptor; oncogene FMS (McDonough feline sarcoma)	ATP binding,CSF1-CSF1R complex,DNA binding,axon guidance,biological_process,cell proliferation,cell surface,cell-cell junction maintenance,cellular response to cytokine stimulus,cellular response to macrophage colony-stimulating factor stimulus,cellular_component,cytokine binding,cytokine-mediated signaling pathway,forebrain neuron differentiation,hemopoiesis,inflammatory response,innate immune r…	Autoimmune Diseases;Brain Diseases;Breast Diseases;Breast Neoplasms;Central Nervous System Diseases;Female Urogenital Diseases;Female Urogenital Diseases and Pregnancy Complications;Glomerulonephritis;Glomerulonephritis, IGA;Immune System Diseases;Kidney Diseases;Leukemia;Leukemia, Myeloid;Leukemia, Myeloid, Acute;Leukoencephalopathies;Male Urogenital Diseases;Neoplasm Metastasis;Neoplasms;Neopla…	5-CYANO-FURAN-2-CARBOXYLIC ACID 5-HYDROXYMETHYL-2-(4-METHYL-PIPERIDIN-1-YL)-PHENYL-AMIDE,6-CHLORO-3-(3-METHYLISOXAZOL-5-YL)-4-PHENYLQUINOLIN-2(1H)-ONE,ABT-869,Imatinib,Sunitinib		G=4, GA=636	G=0.0063, GA=0.9938	1e-05	8116.26
	chr7:128846374	G/A	G	A	SNV	SMO	SMO : exonic : NM_005631.4	1	COSM13148	57.28	+	6	NM_005631.4	c.1210G>A	p.Val404Met	missense			9.84	0	21	0.999	Pathogenic	Frizzled/Smoothened family membrane region,Fz domain																NS,adenocarcinoma	Smoothened, Drosophila, homolog of,Spermine oxidase	G-protein coupled receptor activity,G-protein coupled receptor signaling pathway,Golgi apparatus,Wnt-activated receptor activity,Wnt-protein binding,anterior/posterior pattern specification,astrocyte activation,atrial septum morphogenesis,canonical Wnt signaling pathway,caveola,cell fate specification,cellular response to cholesterol,central nervous system neuron differentiation,cerebellar cortex…	Ameloblastoma;Bone Diseases;Bone Neoplasms;Brain Diseases;Brain Neoplasms;Carcinoma;Carcinoma, Basal Cell;Central Nervous System Diseases;Central Nervous System Neoplasms;Congenital Abnormalities;Congenital, Hereditary, and Neonatal Diseases and Abnormalities;Craniofacial Abnormalities;Jaw Abnormalities;Jaw Diseases;Jaw Neoplasms;Leukemia;Leukemia, Myeloid;Leukemia, Myeloid, Acute;Leukemia, Promy…	Fluocinonide,Halcinonide,Sonidegib,Vismodegib		G=616, A=826	G=0.4272, A=0.5728	1e-05	12159.2
	chr9:133738370	A/G	A	G	SNV	ABL1	ABL1 : exonic : NM_005157.5	1	COSM1674906	49.7	+	4	NM_005157.5	c.770A>G	p.Tyr257Cys	missense			9.29		194	1	Pathogenic	Protein kinase domain,Protein tyrosine kinase,SH2 domain,SH3 domain,Variant SH3 domain																NS,adenocarcinoma	Abelson murine leukemia viral (v-abl) oncogene homolog 1	ATP binding,B cell proliferation involved in immune response,B cell receptor signaling pathway,B-1 B cell homeostasis,Bergmann glial cell differentiation,DNA binding,DNA damage induced protein phosphorylation,Fc-gamma receptor signaling pathway involved in phagocytosis,SH3 domain binding,actin cytoskeleton,actin cytoskeleton organization,actin filament binding,actin filament branching,actin monom…	Adenocarcinoma;Bone Marrow Diseases;Breast Diseases;Breast Neoplasms;Carcinogenesis;Carcinoma;Digestive System Diseases;Digestive System Neoplasms;Esophageal Diseases;Esophageal Neoplasms;Gastrointestinal Diseases;Gastrointestinal Neoplasms;Head and Neck Neoplasms;Hematologic Diseases;Hemic and Lymphatic Diseases;Immune System Diseases;Immunoproliferative Disorders;Leukemia;Leukemia, Lymphoid;Leu…	1-4-(PYRIDIN-4-YLOXY)PHENYL-3-3-(TRIFLUOROMETHYL)PHENYLUREA,2-amino-5-3-(1-ethyl-1H-pyrazol-5-yl)-1H-pyrrolo2,3-bpyridin-5-yl-N,N-dimethylbenzamide,2-{(6-OXO-1,6-DIHYDROPYRIDIN-3-YL)METHYLAMINO}-N-4-PROPYL-3-(TRIFLUOROMETHYL)PHENYLBENZAMIDE,5-3-(2-METHOXYPHENYL)-1H-PYRROLO2,3-BPYRIDIN-5-YL-N,N-DIMETHYLPYRIDINE-3-CARBOXAMIDE,6-(2,6-DICHLOROPHENYL)-2-{3-(HYDROXYMETHYL)PHENYLAMINO}-8-METHYLPYRIDO2,3…		A=338, G=334	A=0.503, G=0.497	1e-05	3668.3
	chr9:133738378	G/A	G	A	SNV	ABL1	ABL1 : exonic : NM_005157.5	1		4.85	+	4	NM_005157.5	c.778G>A	p.Val260Met	missense			7.83		21	0.988		Protein kinase domain,Protein tyrosine kinase,SH2 domain,SH3 domain,Variant SH3 domain	rs772834697							0.0 (pos.133738378)	0.0 (pos.133738378)	0.0 (pos.133738378)	0.0 (pos.133738378)	0.0 (pos.133738378)	1.511E-5 (pos.133738378)	0.0 (pos.133738378)	8.356E-6 (pos.133738378)		Abelson murine leukemia viral (v-abl) oncogene homolog 1	ATP binding,B cell proliferation involved in immune response,B cell receptor signaling pathway,B-1 B cell homeostasis,Bergmann glial cell differentiation,DNA binding,DNA damage induced protein phosphorylation,Fc-gamma receptor signaling pathway involved in phagocytosis,SH3 domain binding,actin cytoskeleton,actin cytoskeleton organization,actin filament binding,actin filament branching,actin monom…	Adenocarcinoma;Bone Marrow Diseases;Breast Diseases;Breast Neoplasms;Carcinogenesis;Carcinoma;Digestive System Diseases;Digestive System Neoplasms;Esophageal Diseases;Esophageal Neoplasms;Gastrointestinal Diseases;Gastrointestinal Neoplasms;Head and Neck Neoplasms;Hematologic Diseases;Hemic and Lymphatic Diseases;Immune System Diseases;Immunoproliferative Disorders;Leukemia;Leukemia, Lymphoid;Leu…	1-4-(PYRIDIN-4-YLOXY)PHENYL-3-3-(TRIFLUOROMETHYL)PHENYLUREA,2-amino-5-3-(1-ethyl-1H-pyrazol-5-yl)-1H-pyrrolo2,3-bpyridin-5-yl-N,N-dimethylbenzamide,2-{(6-OXO-1,6-DIHYDROPYRIDIN-3-YL)METHYLAMINO}-N-4-PROPYL-3-(TRIFLUOROMETHYL)PHENYLBENZAMIDE,5-3-(2-METHOXYPHENYL)-1H-PYRROLO2,3-BPYRIDIN-5-YL-N,N-DIMETHYLPYRIDINE-3-CARBOXAMIDE,6-(2,6-DICHLOROPHENYL)-2-{3-(HYDROXYMETHYL)PHENYLAMINO}-8-METHYLPYRIDO2,3…		G=628, A=32	G=0.9515, A=0.0485	1e-05	55.1944
	chr12:25398280	GCCACC/GTCACC	GCCACC	AACACC,ACCACC,ACGACC,ATCACC,CACACC,CCCACC,GCCACCACC,GCCACT,GCCATC,GCCGCC,GTCACC,TCCACC,TTCACC	SNV	KRAS	KRAS : exonic : NM_033360.3	1	COSM532	AACACC=0.00, ACCACC=0.00, ACGACC=0.00, ATCACC=0.00, CACACC=0.00, CCCACC=0.00, GCCACCACC=0.00, GCCACT=0.05, GCCATC=0.05, GCCGCC=0.00, GTCACC=50.81, TCCACC=0.00, TTCACC=0.00	-	2	NM_033360.3	c.38G>A	p.Gly13Asp	missense	pathogenic		2.4,7.75,7.75,2.43,7.75,7.75	0	94	0.803	Pathogenic	Ras family,Ras of Complex, Roc, domain of DAPkinase	rs112445441							0.0 (pos.25398280),0.0 (pos.25398284),0.0 (pos.25398285)	0.0 (pos.25398280),0.0 (pos.25398284),1.256E-4 (pos.25398285)	0.0 (pos.25398280),0.0 (pos.25398284),0.0 (pos.25398285)	0.0 (pos.25398280),0.0 (pos.25398284),0.0 (pos.25398285)	0.0 (pos.25398284),0.0 (pos.25398285),7.061E-5 (pos.25398280)	0.0 (pos.25398280),1.873E-5 (pos.25398284),1.873E-5 (pos.25398285)	0.0 (pos.25398280),0.0 (pos.25398285),1.112E-4 (pos.25398284)	1.976E-5 (pos.25398284),1.976E-5 (pos.25398285),9.826E-6 (pos.25398280)	Hurthle_cell_carcinoma,NK-T_cell_lymphoma,NS,acute_myeloid_leukaemia,adenocarcinoma,adenoma,ductal_carcinoma,endometrioid_carcinoma,hepatocellular_carcinoma,intestinal_adenocarcinoma,mucinous_carcinoma,non_small_cell_carcinoma	Kirsten rat sarcoma-2 viral (v-Ki-ras2) oncogene homolog	ERBB2 signaling pathway,Fc-epsilon receptor signaling pathway,GDP binding,GMP binding,GTP binding,GTPase activity,LRR domain binding,MAPK cascade,Ras protein signal transduction,actin cytoskeleton organization,axon guidance,cytokine-mediated signaling pathway,cytoplasm,cytosol,endocrine signaling,epidermal growth factor receptor signaling pathway,epithelial tube branching involved in lung morphog…	Abnormalities, Multiple;Adenocarcinoma;Adenoma;Adnexal Diseases;Arthritis;Arthritis, Juvenile;Astrocytoma;Autoimmune Diseases;Biliary Tract Diseases;Biliary Tract Neoplasms;Bone Marrow Diseases;Breast Diseases;Breast Neoplasms;Bronchial Neoplasms;Carcinogenesis;Carcinoma;Carcinoma, Bronchogenic;Carcinoma, Ductal;Carcinoma, Hepatocellular;Carcinoma, Non-Small-Cell Lung;Carcinoma, Pancreatic Ductal…	(3,7,11-TRIMETHYL-DODECA-2,6,10-TRIENYLOXYCARBAMOYL)-METHYL-PHOSPHONIC ACID,FARNESYL DIPHOSPHATE		GCCACC=975, AACACC=0, ACCACC=0, ACGACC=0, ATCACC=0, CACACC=0, CCCACC=0, GCCACCACC=0, GCCACT=1, GCCATC=1, GCCGCC=0, GTCACC=1009, TCCACC=0, TTCACC=0	GCCACC=0.4909, AACACC=0.0, ACCACC=0.0, ACGACC=0.0, ATCACC=0.0, CACACC=0.0, CCCACC=0.0, GCCACCACC=0.0, GCCACT=5.0E-4, GCCATC=5.0E-4, GCCGCC=0.0, GTCACC=0.5081, TCCACC=0.0, TTCACC=0.0	1e-05	14259.5
	chr13:28610183	G/G	A	G	SNV	FLT3	FLT3 : intronic : NM_004119.2	1		100	-		NM_004119.2	c.1310-3T>C					1.33				neutral	Immunoglobulin domain,Protein kinase domain,Protein tyrosine kinase	rs2491231		0.437 (ref)	0.2179	0.293	0.3836	YES	7.186E-1 (pos.28610183)	7.435E-1 (pos.28610183)	7.02E-1 (pos.28610183)	7.989E-1 (pos.28610183)	6.013E-1 (pos.28610183)	7.702E-1 (pos.28610183)	2.756E-1 (pos.28610183)	6.993E-1 (pos.28610183)	NS,acute_myeloid_leukaemia	fms-related tyrosine kinase-3	ATP binding,B cell differentiation,animal organ regeneration,cellular response to cytokine stimulus,cellular response to glucocorticoid stimulus,common myeloid progenitor cell proliferation,cytokine receptor activity,cytokine-mediated signaling pathway,cytosol,dendritic cell differentiation,endoplasmic reticulum lumen,glucocorticoid receptor binding,hemopoiesis,integral component of plasma membra…	Cardiovascular Diseases;Embolism and Thrombosis;Hematologic Diseases;Hemic and Lymphatic Diseases;Immune System Diseases;Immunoproliferative Disorders;Leukemia;Leukemia, Biphenotypic, Acute;Leukemia, Lymphoid;Leukemia, Myeloid;Leukemia, Myeloid, Acute;Leukemia, Promyelocytic, Acute;Lymphatic Diseases;Lymphoproliferative Disorders;Neoplasms;Neoplasms by Histologic Type;Thrombosis;Vascular Diseases	ABT-869,AC220,MLN-518,MP470,Nintedanib,Ponatinib,Sorafenib,Sunitinib,XL999		A=0, G=2000	A=0.0, G=1.0	1e-05	33982.3
	chr18:48586344	C/T	C	T	SNV	SMAD4	SMAD4 : intronic : NM_005359.5	1		47.3	+		NM_005359.5	c.955+58C>T					-0.95					MH1 domain,MH2 domain			0.039	0.0729	0.0137	0.055	YES	0.0 (pos.48586334)	0.0 (pos.48586334)	0.0 (pos.48586334)	0.0 (pos.48586334)	0.0 (pos.48586334)	1.519E-5 (pos.48586334)	0.0 (pos.48586334)	8.338E-6 (pos.48586334)		Mothers against decapentaplegic, Drosophila, homolog of, 4	BMP signaling pathway,DNA binding,I-SMAD binding,R-SMAD binding,RNA polymerase II core promoter proximal region sequence-specific DNA binding,RNA polymerase II transcription factor binding,SMAD protein complex,SMAD protein complex assembly,SMAD protein signal transduction,activin responsive factor complex,atrioventricular canal development,atrioventricular valve formation,axon guidance,brainstem …	Adenocarcinoma;Brachydactyly;Breast Diseases;Breast Neoplasms;Carcinoma;Carcinoma, Ductal;Carcinoma, Ductal, Breast;Cardiovascular Abnormalities;Cardiovascular Diseases;Cholangiocarcinoma;Cognition Disorders;Colonic Diseases;Colorectal Neoplasms;Congenital Abnormalities;Congenital, Hereditary, and Neonatal Diseases and Abnormalities;Craniofacial Abnormalities;Deafness;Digestive System Diseases;Di…			C=1054, T=946	C=0.527, T=0.473	1e-05	10177.1
	chr22:24176287	G/A	G	A	SNV	DERL3,SMARCB1	SMARCB1 : intronic : NM_003073.4, DERL3 : downstream : NM_001135751.1	1	COSM1090	46.7	+, -		NM_003073.4, NM_001135751.1	c.1119-41G>A, c.*727C>T					-0.76				0.028	SNF5 / SMARCB1 / INI1	rs5030613		0.152	0.1284	0.125	0.1272	YES	1.694E-1 (pos.24176287)	1.716E-1 (pos.24176287)	2.018E-1 (pos.24176287)	2.551E-1 (pos.24176287)	2.784E-1 (pos.24176287)	1.743E-1 (pos.24176287)	1.439E-1 (pos.24176287)	2.033E-1 (pos.24176287)	acute_lymphoblastic_leukaemia,plasma_cell_myeloma	DER1-like domain family, member 3,SWI/SNF related, matrix associated, actin dependent regulator of chromatin, subfamily b, member 1	ATP-dependent chromatin remodeling,DNA binding,DNA integration,DNA repair,ER-associated ubiquitin-dependent protein catabolic process,RNA polymerase I CORE element sequence-specific DNA binding,RNA polymerase II core promoter proximal region sequence-specific DNA binding,RNA polymerase II distal enhancer sequence-specific DNA binding,SWI/SNF complex,Tat protein binding,XY body,blastocyst hatching…	Congenital, Hereditary, and Neonatal Diseases and Abnormalities;Genetic Diseases, Inborn;Heredodegenerative Disorders, Nervous System;Neoplasms;Neoplasms by Histologic Type;Neoplasms, Complex and Mixed;Neoplasms, Nerve Tissue;Neoplastic Syndromes, Hereditary;Nerve Sheath Neoplasms;Nervous System Diseases;Neurocutaneous Syndromes;Neurodegenerative Diseases;Neurofibroma;Neurofibromatoses;Rhabdoid T…			G=1066, A=934	G=0.533, A=0.467	1e-05	12744.6
HCT CAPE	chr1:43814994	T/A	T	A	SNV	MPL	MPL : exonic : NM_005373.2	1		5.43	+	10	NM_005373.2	c.1529T>A	p.Leu510Gln	missense			2.46	0	113	0.716	0.769																	myelofibrosis	Myeloproliferative leukemia virus, homolog of	Golgi apparatus,cell proliferation,cell surface,cell surface receptor signaling pathway,integral component of plasma membrane,plasma membrane,protein binding,thrombopoietin receptor activity,thrombopoietin-mediated signaling pathway,transmembrane signaling receptor activity	Blood Coagulation Disorders;Blood Platelet Disorders;Bone Marrow Diseases;Glioma;Hematologic Diseases;Hemic and Lymphatic Diseases;Hemorrhagic Disorders;Medulloblastoma;Myeloproliferative Disorders;Neoplasms;Neoplasms by Histologic Type;Neoplasms, Germ Cell and Embryonal;Neoplasms, Glandular and Epithelial;Neoplasms, Nerve Tissue;Neoplasms, Neuroepithelial;Neuroectodermal Tumors;Neuroectodermal T…	Eltrombopag,Romiplostim,SB-559448		T=1881, A=108	T=0.9457, A=0.0543	1e-05	193.024
	chr2:212812097	C/C	T	C	SNV	ERBB4	ERBB4 : intronic : NM_005235.2	1		99.95	-		NM_005235.2	c.421+58A>G					-3.34					Furin-like cysteine rich region,Protein kinase domain,Protein tyrosine kinase,Receptor L domain	rs839541		0.355				YES										Avian erythroblastic leukemia viral (v-erb-b2) oncogene homolog 4	ATP binding,ERBB2 signaling pathway,MAPK cascade,Ras guanyl-nucleotide exchange factor activity,basolateral plasma membrane,cardiac muscle tissue regeneration,cell fate commitment,cell migration,cell proliferation,central nervous system morphogenesis,cytosol,embryonic pattern specification,epidermal growth factor receptor binding,extracellular region,heart development,integral component of membra…	Amyotrophic Lateral Sclerosis;Asthma;Biliary Tract Diseases;Biliary Tract Neoplasms;Brain Diseases;Breast Diseases;Breast Neoplasms;Bronchial Diseases;Cardiovascular Diseases;Central Nervous System Diseases;Diabetes Complications;Diabetes Mellitus;Diabetic Nephropathies;Digestive System Diseases;Digestive System Neoplasms;Endocrine System Diseases;Female Urogenital Diseases;Female Urogenital Dise…	Afatinib		T=1, C=1999	T=5.0E-4, C=0.9995	1e-05	33931.7
	chr3:41266133	CCTT/C	CCTT	C,GCTT,TCTT	INDEL	CTNNB1	CTNNB1 : exonic : NM_001904.3	3	COSM6128	C=33.46, GCTT=0.00, TCTT=0.00	+	3	NM_001904.3	c.133_135delTCT	p.Ser45del	nonframeshiftDeletion	pathogenic		7.82,7.82,-0.24,8.04				0.977,0.981	Armadillo/beta-catenin-like repeat	rs121913407															NS,adenocarcinoma,aldosterone_producing,anaplastic_carcinoma,cortisol_producing,functioning,hepatocellular_carcinoma,non_functioning	Catenin (cadherin-associated protein), beta 1, 88kD	I-SMAD binding,RNA polymerase II activating transcription factor binding,RNA polymerase II transcription factor binding,SMAD binding,Schwann cell proliferation,Scrib-APC-beta-catenin complex,T cell differentiation in thymus,Wnt signaling pathway,Wnt signaling pathway, calcium modulating pathway,Wnt signalosome,Z disc,adherens junction,adherens junction assembly,alpha-catenin binding,androgen rece…	Aberrant Crypt Foci;Adenocarcinoma;Adenoma;Adenoma, Liver Cell;Adnexal Diseases;Adrenal Cortex Diseases;Adrenal Cortex Neoplasms;Adrenal Gland Diseases;Adrenal Gland Neoplasms;Adrenocortical Carcinoma;Breast Diseases;Breast Neoplasms;Carcinoma;Carcinoma, Hepatocellular;Cardiovascular Diseases;Cecal Diseases;Cecal Neoplasms;Colonic Diseases;Colonic Neoplasms;Colorectal Neoplasms;Congenital Abnorma…	Urea	Pathogenic	CCTT=901, C=453, GCTT=0, TCTT=0	CCTT=0.6654, C=0.3346, GCTT=0.0, TCTT=0.0	1e-05	5320.6
	chr3:178952085	A/G	A	G,T	SNV	PIK3CA	PIK3CA : exonic : NM_006218.3	1	COSM775	G=47.00, T=0.05	+	21	NM_006218.3	c.3140A>G	p.His1047Arg	missense	pathogenic		8.86		29	0.639	Pathogenic	PI3-kinase family, p85-binding domain,PI3-kinase family, ras-binding domain,Phosphatidylinositol 3- and 4-kinase,Phosphoinositide 3-kinase C2,Phosphoinositide 3-kinase family, accessory domain (PIK domain)	rs121913279							0.0;0.0 (pos.178952085)	0.0;0.0 (pos.178952085)	0.0;0.0 (pos.178952085)	0.0;0.0 (pos.178952085)	0.0;0.0 (pos.178952085)	1.505E-5;1.505E-5 (pos.178952085)	0.0;0.0 (pos.178952085)	8.317E-6;8.317E-6 (pos.178952085)	Brenner_tumour,CLOVES_syndrome,ER-HER-positive_carcinoma,ER-PR-HER-positive_carcinoma,ER-PR-positive_carcinoma,ER-positive_carcinoma,HER-positive_carcinoma,Hurthle_cell_carcinoma,Merkel_cell_carcinoma,NS,SHH_subtype,acinic_cell_carcinoma,adenocarcinoma,adenoid_cystic_carcinoma,adenoma,alveolar,anaplastic_carcinoma,astrocytoma_Grade_III,astrocytoma_Grade_IV,atypical,basal_(triple-negative)_carcino…	Phosphatidylinositol 3-kinase, catalytic, alpha polypeptide	1-phosphatidylinositol-3-kinase activity,1-phosphatidylinositol-4-phosphate 3-kinase activity,ATP binding,ERBB2 signaling pathway,Fc-epsilon receptor signaling pathway,Fc-gamma receptor signaling pathway involved in phagocytosis,T cell costimulation,T cell receptor signaling pathway,activation of protein kinase activity,adipose tissue development,angiogenesis,cardiac muscle contraction,cellular r…	Adenocarcinoma;Adnexal Diseases;Autoimmune Diseases;Breast Diseases;Breast Neoplasms;Bronchial Neoplasms;Carcinoma;Carcinoma, Adenoid Cystic;Carcinoma, Bronchogenic;Carcinoma, Hepatocellular;Carcinoma, Non-Small-Cell Lung;Carcinoma, Renal Cell;Carcinoma, Squamous Cell;Colonic Diseases;Colorectal Neoplasms;Colorectal Neoplasms, Hereditary Nonpolyposis;Congenital Abnormalities;Congenital, Hereditar…	(1S,6BR,9AS,11R,11BR)-9A,11B-DIMETHYL-1-(METHYLOXY)METHYL-3,6,9-TRIOXO-1,6,6B,7,8,9,9A,10,11,11B-DECAHYDRO-3H-FURO4,3,2-DEINDENO4,5-H2BENZOPYRAN-11-YL ACETATE,Caffeine,XL147,XL765	Likely pathogenic,Pathogenic,other	A=1059, G=940, T=1	A=0.5295, G=0.47, T=5.0E-4	1e-05	12867.8
	chr4:55593679	G/A	G	A	SNV	KIT	KIT : exonic : NM_000222.2	1	COSM36305	2.05	+	11	NM_000222.2	c.1745G>A	p.Trp582Ter	nonsense			9.67				Pathogenic	Immunoglobulin I-set domain,Immunoglobulin domain,Protein kinase domain,Protein tyrosine kinase																NS,other,papillary_carcinoma,sebaceous_carcinoma	Hardy-Zuckerman 4 feline sarcoma (v-kit) oncogene	ATP binding,Fc receptor signaling pathway,Kit signaling pathway,MAPK cascade,Ras guanyl-nucleotide exchange factor activity,T cell differentiation,acrosomal vesicle,actin cytoskeleton reorganization,activation of MAPK activity,cell chemotaxis,cell-cell junction,cellular response to thyroid hormone stimulus,cytokine binding,cytokine-mediated signaling pathway,cytoplasmic side of plasma membrane,de…	Albinism;Amino Acid Metabolism, Inborn Errors;Breast Diseases;Breast Neoplasms;Bronchial Neoplasms;Carcinoma, Bronchogenic;Carcinoma, Non-Small-Cell Lung;Congenital, Hereditary, and Neonatal Diseases and Abnormalities;Digestive System Diseases;Digestive System Neoplasms;Endocrine Gland Neoplasms;Endocrine System Diseases;Eye Diseases, Hereditary;Gastrointestinal Diseases;Gastrointestinal Neoplasm…	ABT-869,Dasatinib,Imatinib,Lenvatinib,MP470,Nilotinib,OSI-930,Pazopanib,Phosphonotyrosine,Ponatinib,Regorafenib,Sorafenib,Sunitinib,XL184,XL820		G=1957, A=41	G=0.9795, A=0.0205	1e-05	49.3926
	chr4:55946354	G/T	G	T	SNV	KDR	KDR : intronic : NM_002253.2	1		52.48	-		NM_002253.2	c.3849-24C>A					1.73					CD80-like C2-set immunoglobulin domain,Immunoglobulin I-set domain,Immunoglobulin V-set domain,Immunoglobulin domain,Protein kinase domain,Protein tyrosine kinase	rs10006115		0.072	0.0365	0.0788	0.0508	YES	2.476E-2 (pos.55946354)	9.641E-2 (pos.55946354)	6.541E-2 (pos.55946354)	3.674E-2 (pos.55946354)	7.998E-2 (pos.55946354)	4.085E-2 (pos.55946354)	8.512E-2 (pos.55946354)	5.236E-2 (pos.55946354)		Kinase insert domain receptor	ATP binding,Golgi apparatus,Hsp90 protein binding,angiogenesis,calcium-mediated signaling using intracellular calcium source,cell junction,cell migration involved in sprouting angiogenesis,cellular response to vascular endothelial growth factor stimulus,early endosome,embryonic hemopoiesis,endoplasmic reticulum,endosome,endothelium development,extracellular matrix organization,extracellular regio…	Adenocarcinoma;Bone Diseases;Bone Diseases, Developmental;Brain Diseases;Brain Ischemia;Breast Diseases;Breast Neoplasms;Carcinoma;Cardiovascular Diseases;Central Nervous System Diseases;Cerebral Hemorrhage;Cerebrovascular Disorders;Colonic Diseases;Colorectal Neoplasms;Congenital, Hereditary, and Neonatal Diseases and Abnormalities;Diabetes Complications;Diabetes Mellitus;Diabetic Nephropathies;…	3-(2-aminoquinazolin-6-yl)-1-(3,3-dimethylindolin-6-yl)-4-methylpyridin-2(1H)-one,3-(2-aminoquinazolin-6-yl)-4-methyl-1-3-(trifluoromethyl)phenylpyridin-2(1H)-one,4-2-4-chloro-3-(trifluoromethyl)phenylamino-3H-benzimidazol-5-yloxy-N-methyl-pyridine-2-carboxamide,6-chloro-N-pyrimidin-5-yl-3-{3-(trifluoromethyl)phenylamino}-1,2-benzisoxazole-7-carboxamide,ABT-869,AZD2171,Axitinib,CYC116,Cabozantini…		G=950, T=1049	G=0.4752, T=0.5248	1e-05	11912.7
	chr4:55972974	T/A	T	A	SNV	KDR	KDR : exonic : NM_002253.2	1	COSM149673	47.41	-	11	NM_002253.2	c.1416A>T	p.Gln472His	missense			-0.05	0.03	24	0.003	neutral	CD80-like C2-set immunoglobulin domain,Immunoglobulin I-set domain,Immunoglobulin V-set domain,Immunoglobulin domain,Protein kinase domain,Protein tyrosine kinase	rs1870377		0.212	0.2369	0.1101	0.1939	YES	9.352E-2 (pos.55972974)	4.637E-1 (pos.55972974)	2.307E-1 (pos.55972974)	2.857E-1 (pos.55972974)	1.691E-1 (pos.55972974)	2.333E-1 (pos.55972974)	1.061E-1 (pos.55972974)	2.198E-1 (pos.55972974)	NS,acute_myeloid_leukaemia,adenocarcinoma,alveolar,diffuse_large_B_cell_lymphoma,embryonal	Kinase insert domain receptor	ATP binding,Golgi apparatus,Hsp90 protein binding,angiogenesis,calcium-mediated signaling using intracellular calcium source,cell junction,cell migration involved in sprouting angiogenesis,cellular response to vascular endothelial growth factor stimulus,early endosome,embryonic hemopoiesis,endoplasmic reticulum,endosome,endothelium development,extracellular matrix organization,extracellular regio…	Adenocarcinoma;Bone Diseases;Bone Diseases, Developmental;Brain Diseases;Brain Ischemia;Breast Diseases;Breast Neoplasms;Carcinoma;Cardiovascular Diseases;Central Nervous System Diseases;Cerebral Hemorrhage;Cerebrovascular Disorders;Colonic Diseases;Colorectal Neoplasms;Congenital, Hereditary, and Neonatal Diseases and Abnormalities;Diabetes Complications;Diabetes Mellitus;Diabetic Nephropathies;…	3-(2-aminoquinazolin-6-yl)-1-(3,3-dimethylindolin-6-yl)-4-methylpyridin-2(1H)-one,3-(2-aminoquinazolin-6-yl)-4-methyl-1-3-(trifluoromethyl)phenylpyridin-2(1H)-one,4-2-4-chloro-3-(trifluoromethyl)phenylamino-3H-benzimidazol-5-yloxy-N-methyl-pyridine-2-carboxamide,6-chloro-N-pyrimidin-5-yl-3-{3-(trifluoromethyl)phenylamino}-1,2-benzisoxazole-7-carboxamide,ABT-869,AZD2171,Axitinib,CYC116,Cabozantini…	not provided	T=925, A=834	T=0.5259, A=0.4741	1e-05	8910.57
	chr4:55980239	T/T	C	T	SNV	KDR	KDR : intronic : NM_002253.2	1		99.45	-		NM_002253.2	c.798+54G>A					-0.3					CD80-like C2-set immunoglobulin domain,Immunoglobulin I-set domain,Immunoglobulin V-set domain,Immunoglobulin domain,Protein kinase domain,Protein tyrosine kinase	rs7692791		0.456 (ref)				YES										Kinase insert domain receptor	ATP binding,Golgi apparatus,Hsp90 protein binding,angiogenesis,calcium-mediated signaling using intracellular calcium source,cell junction,cell migration involved in sprouting angiogenesis,cellular response to vascular endothelial growth factor stimulus,early endosome,embryonic hemopoiesis,endoplasmic reticulum,endosome,endothelium development,extracellular matrix organization,extracellular regio…	Adenocarcinoma;Bone Diseases;Bone Diseases, Developmental;Brain Diseases;Brain Ischemia;Breast Diseases;Breast Neoplasms;Carcinoma;Cardiovascular Diseases;Central Nervous System Diseases;Cerebral Hemorrhage;Cerebrovascular Disorders;Colonic Diseases;Colorectal Neoplasms;Congenital, Hereditary, and Neonatal Diseases and Abnormalities;Diabetes Complications;Diabetes Mellitus;Diabetic Nephropathies;…	3-(2-aminoquinazolin-6-yl)-1-(3,3-dimethylindolin-6-yl)-4-methylpyridin-2(1H)-one,3-(2-aminoquinazolin-6-yl)-4-methyl-1-3-(trifluoromethyl)phenylpyridin-2(1H)-one,4-2-4-chloro-3-(trifluoromethyl)phenylamino-3H-benzimidazol-5-yloxy-N-methyl-pyridine-2-carboxamide,6-chloro-N-pyrimidin-5-yl-3-{3-(trifluoromethyl)phenylamino}-1,2-benzisoxazole-7-carboxamide,ABT-869,AZD2171,Axitinib,CYC116,Cabozantini…		C=7, T=1257	C=0.0055, T=0.9945	1e-05	21114.7
	chr5:149433595	G/G	GT	G	INDEL	CSF1R,HMGXB3	CSF1R : utr_3 : NM_005211.3, HMGXB3 : downstream : NM_014983.2	1		100	+, -		NM_014983.2, NM_005211.3	c.*37delA					0.04,0.82					Immunoglobulin domain,Protein kinase domain,Protein tyrosine kinase	rs2066934,rs35308019,rs386693509		0.203				YES	7.768E-1 (pos.149433596)	7.267E-1 (pos.149433596)	7.465E-1 (pos.149433596)	8.023E-1 (pos.149433596)	6.889E-1 (pos.149433596)	7.733E-1 (pos.149433596)	9.482E-1 (pos.149433596)	7.754E-1 (pos.149433596)		Colony-stimulating factor-1 receptor; oncogene FMS (McDonough feline sarcoma)	ATP binding,CSF1-CSF1R complex,DNA binding,axon guidance,biological_process,cell proliferation,cell surface,cell-cell junction maintenance,cellular response to cytokine stimulus,cellular response to macrophage colony-stimulating factor stimulus,cellular_component,cytokine binding,cytokine-mediated signaling pathway,forebrain neuron differentiation,hemopoiesis,inflammatory response,innate immune r…	Autoimmune Diseases;Brain Diseases;Breast Diseases;Breast Neoplasms;Central Nervous System Diseases;Female Urogenital Diseases;Female Urogenital Diseases and Pregnancy Complications;Glomerulonephritis;Glomerulonephritis, IGA;Immune System Diseases;Kidney Diseases;Leukemia;Leukemia, Myeloid;Leukemia, Myeloid, Acute;Leukoencephalopathies;Male Urogenital Diseases;Neoplasm Metastasis;Neoplasms;Neopla…	5-CYANO-FURAN-2-CARBOXYLIC ACID 5-HYDROXYMETHYL-2-(4-METHYL-PIPERIDIN-1-YL)-PHENYL-AMIDE,6-CHLORO-3-(3-METHYLISOXAZOL-5-YL)-4-PHENYLQUINOLIN-2(1H)-ONE,ABT-869,Imatinib,Sunitinib		GT=0, G=703	GT=0.0, G=1.0	1e-05	11771.2
	chr5:149433597	GA/GA	G	GA	INDEL	CSF1R,HMGXB3	CSF1R : utr_3 : NM_005211.3, HMGXB3 : downstream : NM_014983.2	1		99.43	+, -		NM_014983.2, NM_005211.3	c.*35insT					-0.26					Immunoglobulin domain,Protein kinase domain,Protein tyrosine kinase	rs2066933,rs386693509		0.204 (ref)	0.4213	0.3584	0.4959	YES	7.757E-1 (pos.149433597)	7.198E-1 (pos.149433597)	7.453E-1 (pos.149433597)	8.016E-1 (pos.149433597)	6.887E-1 (pos.149433597)	7.73E-1 (pos.149433597)	9.483E-1 (pos.149433597)	7.745E-1 (pos.149433597)		Colony-stimulating factor-1 receptor; oncogene FMS (McDonough feline sarcoma)	ATP binding,CSF1-CSF1R complex,DNA binding,axon guidance,biological_process,cell proliferation,cell surface,cell-cell junction maintenance,cellular response to cytokine stimulus,cellular response to macrophage colony-stimulating factor stimulus,cellular_component,cytokine binding,cytokine-mediated signaling pathway,forebrain neuron differentiation,hemopoiesis,inflammatory response,innate immune r…	Autoimmune Diseases;Brain Diseases;Breast Diseases;Breast Neoplasms;Central Nervous System Diseases;Female Urogenital Diseases;Female Urogenital Diseases and Pregnancy Complications;Glomerulonephritis;Glomerulonephritis, IGA;Immune System Diseases;Kidney Diseases;Leukemia;Leukemia, Myeloid;Leukemia, Myeloid, Acute;Leukoencephalopathies;Male Urogenital Diseases;Neoplasm Metastasis;Neoplasms;Neopla…	5-CYANO-FURAN-2-CARBOXYLIC ACID 5-HYDROXYMETHYL-2-(4-METHYL-PIPERIDIN-1-YL)-PHENYL-AMIDE,6-CHLORO-3-(3-METHYLISOXAZOL-5-YL)-4-PHENYLQUINOLIN-2(1H)-ONE,ABT-869,Imatinib,Sunitinib		G=4, GA=699	G=0.0057, GA=0.9943	1e-05	8932.54
	chr7:128846374	G/A	G	A	SNV	SMO	SMO : exonic : NM_005631.4	1	COSM13148	56.72	+	6	NM_005631.4	c.1210G>A	p.Val404Met	missense			9.84	0	21	0.999	Pathogenic	Frizzled/Smoothened family membrane region,Fz domain																NS,adenocarcinoma	Smoothened, Drosophila, homolog of,Spermine oxidase	G-protein coupled receptor activity,G-protein coupled receptor signaling pathway,Golgi apparatus,Wnt-activated receptor activity,Wnt-protein binding,anterior/posterior pattern specification,astrocyte activation,atrial septum morphogenesis,canonical Wnt signaling pathway,caveola,cell fate specification,cellular response to cholesterol,central nervous system neuron differentiation,cerebellar cortex…	Ameloblastoma;Bone Diseases;Bone Neoplasms;Brain Diseases;Brain Neoplasms;Carcinoma;Carcinoma, Basal Cell;Central Nervous System Diseases;Central Nervous System Neoplasms;Congenital Abnormalities;Congenital, Hereditary, and Neonatal Diseases and Abnormalities;Craniofacial Abnormalities;Jaw Abnormalities;Jaw Diseases;Jaw Neoplasms;Leukemia;Leukemia, Myeloid;Leukemia, Myeloid, Acute;Leukemia, Promy…	Fluocinonide,Halcinonide,Sonidegib,Vismodegib		G=567, A=743	G=0.4328, A=0.5672	1e-05	10819.3
	chr12:25398280	GCCACC/GTCACC	GCCACC	AACACC,ACCACC,ACGACC,ATCACC,CACACC,CCCACC,GCCACCACC,GCCACT,GCCGCC,GCCTCC,GCTACC,GTCACC,TCCACC,TTCACC	SNV	KRAS	KRAS : exonic : NM_033360.3	1	COSM532	AACACC=0.00, ACCACC=0.00, ACGACC=0.00, ATCACC=0.00, CACACC=0.00, CCCACC=0.00, GCCACCACC=0.00, GCCACT=0.00, GCCGCC=0.00, GCCTCC=0.00, GCTACC=0.10, GTCACC=48.20, TCCACC=0.00, TTCACC=0.00	-	2	NM_033360.3	c.38G>A	p.Gly13Asp	missense	pathogenic		2.4,7.75,7.75,2.43,7.75,7.75	0	94	0.803	Pathogenic	Ras family,Ras of Complex, Roc, domain of DAPkinase	rs112445441							0.0 (pos.25398280),0.0 (pos.25398284),0.0 (pos.25398285)	0.0 (pos.25398280),0.0 (pos.25398284),1.256E-4 (pos.25398285)	0.0 (pos.25398280),0.0 (pos.25398284),0.0 (pos.25398285)	0.0 (pos.25398280),0.0 (pos.25398284),0.0 (pos.25398285)	0.0 (pos.25398284),0.0 (pos.25398285),7.061E-5 (pos.25398280)	0.0 (pos.25398280),1.873E-5 (pos.25398284),1.873E-5 (pos.25398285)	0.0 (pos.25398280),0.0 (pos.25398285),1.112E-4 (pos.25398284)	1.976E-5 (pos.25398284),1.976E-5 (pos.25398285),9.826E-6 (pos.25398280)	Hurthle_cell_carcinoma,NK-T_cell_lymphoma,NS,acute_myeloid_leukaemia,adenocarcinoma,adenoma,ductal_carcinoma,endometrioid_carcinoma,hepatocellular_carcinoma,intestinal_adenocarcinoma,mucinous_carcinoma,non_small_cell_carcinoma	Kirsten rat sarcoma-2 viral (v-Ki-ras2) oncogene homolog	ERBB2 signaling pathway,Fc-epsilon receptor signaling pathway,GDP binding,GMP binding,GTP binding,GTPase activity,LRR domain binding,MAPK cascade,Ras protein signal transduction,actin cytoskeleton organization,axon guidance,cytokine-mediated signaling pathway,cytoplasm,cytosol,endocrine signaling,epidermal growth factor receptor signaling pathway,epithelial tube branching involved in lung morphog…	Abnormalities, Multiple;Adenocarcinoma;Adenoma;Adnexal Diseases;Arthritis;Arthritis, Juvenile;Astrocytoma;Autoimmune Diseases;Biliary Tract Diseases;Biliary Tract Neoplasms;Bone Marrow Diseases;Breast Diseases;Breast Neoplasms;Bronchial Neoplasms;Carcinogenesis;Carcinoma;Carcinoma, Bronchogenic;Carcinoma, Ductal;Carcinoma, Hepatocellular;Carcinoma, Non-Small-Cell Lung;Carcinoma, Pancreatic Ductal…	(3,7,11-TRIMETHYL-DODECA-2,6,10-TRIENYLOXYCARBAMOYL)-METHYL-PHOSPHONIC ACID,FARNESYL DIPHOSPHATE		GCCACC=1021, AACACC=0, ACCACC=0, ACGACC=0, ATCACC=0, CACACC=0, CCCACC=0, GCCACCACC=0, GCCACT=0, GCCGCC=0, GCCTCC=0, GCTACC=2, GTCACC=952, TCCACC=0, TTCACC=0	GCCACC=0.517, AACACC=0.0, ACCACC=0.0, ACGACC=0.0, ATCACC=0.0, CACACC=0.0, CCCACC=0.0, GCCACCACC=0.0, GCCACT=0.0, GCCGCC=0.0, GCCTCC=0.0, GCTACC=0.001, GTCACC=0.482, TCCACC=0.0, TTCACC=0.0	1e-05	13185.8
	chr13:28610183	G/G	A	G	SNV	FLT3	FLT3 : intronic : NM_004119.2	1		99.85	-		NM_004119.2	c.1310-3T>C					1.33				neutral	Immunoglobulin domain,Protein kinase domain,Protein tyrosine kinase	rs2491231		0.437 (ref)	0.2179	0.293	0.3836	YES	7.186E-1 (pos.28610183)	7.435E-1 (pos.28610183)	7.02E-1 (pos.28610183)	7.989E-1 (pos.28610183)	6.013E-1 (pos.28610183)	7.702E-1 (pos.28610183)	2.756E-1 (pos.28610183)	6.993E-1 (pos.28610183)	NS,acute_myeloid_leukaemia	fms-related tyrosine kinase-3	ATP binding,B cell differentiation,animal organ regeneration,cellular response to cytokine stimulus,cellular response to glucocorticoid stimulus,common myeloid progenitor cell proliferation,cytokine receptor activity,cytokine-mediated signaling pathway,cytosol,dendritic cell differentiation,endoplasmic reticulum lumen,glucocorticoid receptor binding,hemopoiesis,integral component of plasma membra…	Cardiovascular Diseases;Embolism and Thrombosis;Hematologic Diseases;Hemic and Lymphatic Diseases;Immune System Diseases;Immunoproliferative Disorders;Leukemia;Leukemia, Biphenotypic, Acute;Leukemia, Lymphoid;Leukemia, Myeloid;Leukemia, Myeloid, Acute;Leukemia, Promyelocytic, Acute;Lymphatic Diseases;Lymphoproliferative Disorders;Neoplasms;Neoplasms by Histologic Type;Thrombosis;Vascular Diseases	ABT-869,AC220,MLN-518,MP470,Nintedanib,Ponatinib,Sorafenib,Sunitinib,XL999		A=3, G=1996	A=0.0015, G=0.9985	1e-05	33822.7
	chr17:7579472	G/C	G	C,T	SNV	TP53	TP53 : exonic : NM_000546.5	1	COSM250061	C=98.09, T=0.00	-	4	NM_000546.5	c.215C>G	p.Pro72Arg	missense	benign	https://www.pharmgkb.org/variant/PA166155173/variantAnnotation	1.02	0.6	103	neutral	0.219,0.361	P53 DNA-binding domain,P53 tetramerisation motif	rs1042522		0.457 (ref)	0.2548	0.4051	0.37	YES	7.115E-1 (pos.7579472)	5.892E-1 (pos.7579472)	6.648E-1 (pos.7579472)	7.304E-1 (pos.7579472)	4.988E-1 (pos.7579472)	7.345E-1 (pos.7579472)	3.842E-1 (pos.7579472)	6.6E-1 (pos.7579472)	NS,adenocarcinoma,astrocytoma_Grade_IV,ductal_carcinoma,epithelial,hepatocellular_carcinoma,other,squamous_cell_carcinoma	Tumor protein p53	ATP binding,DNA binding,DNA damage response, signal transduction by p53 class mediator,DNA damage response, signal transduction by p53 class mediator resulting in cell cycle arrest,DNA damage response, signal transduction by p53 class mediator resulting in transcription of p21 class mediator,DNA strand renaturation,ER overload response,PML body,RNA polymerase II transcription factor activity, seq…	Acute Kidney Injury;Adenocarcinoma;Adenocarcinoma, Clear Cell;Adenoma;Adnexal Diseases;Adrenal Cortex Diseases;Adrenal Cortex Neoplasms;Adrenal Gland Diseases;Adrenal Gland Neoplasms;Adrenocortical Carcinoma;Amyotrophic Lateral Sclerosis;Aortic Stenosis, Subvalvular;Aortic Valve Stenosis;Arsenic Poisoning;Astrocytoma;Balkan Nephropathy;Biliary Tract Diseases;Biliary Tract Neoplasms;Blood Coagulat…	1-(9-ethyl-9H-carbazol-3-yl)-N-methylmethanamine,AZD 3355,Acetylsalicylic acid	Benign,Uncertain significance,drug response	G=10, C=513, T=0	G=0.0191, C=0.9809, T=0.0	1e-05	9764.24
	chr18:48586344	C/T	C	T	SNV	SMAD4	SMAD4 : intronic : NM_005359.5	1		49.35	+		NM_005359.5	c.955+58C>T					-0.95					MH1 domain,MH2 domain			0.039	0.0729	0.0137	0.055	YES	0.0 (pos.48586334)	0.0 (pos.48586334)	0.0 (pos.48586334)	0.0 (pos.48586334)	0.0 (pos.48586334)	1.519E-5 (pos.48586334)	0.0 (pos.48586334)	8.338E-6 (pos.48586334)		Mothers against decapentaplegic, Drosophila, homolog of, 4	BMP signaling pathway,DNA binding,I-SMAD binding,R-SMAD binding,RNA polymerase II core promoter proximal region sequence-specific DNA binding,RNA polymerase II transcription factor binding,SMAD protein complex,SMAD protein complex assembly,SMAD protein signal transduction,activin responsive factor complex,atrioventricular canal development,atrioventricular valve formation,axon guidance,brainstem …	Adenocarcinoma;Brachydactyly;Breast Diseases;Breast Neoplasms;Carcinoma;Carcinoma, Ductal;Carcinoma, Ductal, Breast;Cardiovascular Abnormalities;Cardiovascular Diseases;Cholangiocarcinoma;Cognition Disorders;Colonic Diseases;Colorectal Neoplasms;Congenital Abnormalities;Congenital, Hereditary, and Neonatal Diseases and Abnormalities;Craniofacial Abnormalities;Deafness;Digestive System Diseases;Di…			C=1013, T=987	C=0.5065, T=0.4935	1e-05	10845.6
	chr22:24176287	G/A	G	A	SNV	DERL3,SMARCB1	SMARCB1 : intronic : NM_003073.4, DERL3 : downstream : NM_001135751.1	1	COSM1090	51.4	+, -		NM_003073.4, NM_001135751.1	c.1119-41G>A, c.*727C>T					-0.76				0.028	SNF5 / SMARCB1 / INI1	rs5030613		0.152	0.1284	0.125	0.1272	YES	1.694E-1 (pos.24176287)	1.716E-1 (pos.24176287)	2.018E-1 (pos.24176287)	2.551E-1 (pos.24176287)	2.784E-1 (pos.24176287)	1.743E-1 (pos.24176287)	1.439E-1 (pos.24176287)	2.033E-1 (pos.24176287)	acute_lymphoblastic_leukaemia,plasma_cell_myeloma	DER1-like domain family, member 3,SWI/SNF related, matrix associated, actin dependent regulator of chromatin, subfamily b, member 1	ATP-dependent chromatin remodeling,DNA binding,DNA integration,DNA repair,ER-associated ubiquitin-dependent protein catabolic process,RNA polymerase I CORE element sequence-specific DNA binding,RNA polymerase II core promoter proximal region sequence-specific DNA binding,RNA polymerase II distal enhancer sequence-specific DNA binding,SWI/SNF complex,Tat protein binding,XY body,blastocyst hatching…	Congenital, Hereditary, and Neonatal Diseases and Abnormalities;Genetic Diseases, Inborn;Heredodegenerative Disorders, Nervous System;Neoplasms;Neoplasms by Histologic Type;Neoplasms, Complex and Mixed;Neoplasms, Nerve Tissue;Neoplastic Syndromes, Hereditary;Nerve Sheath Neoplasms;Nervous System Diseases;Neurocutaneous Syndromes;Neurodegenerative Diseases;Neurofibroma;Neurofibromatoses;Rhabdoid T…			G=972, A=1028	G=0.486, A=0.514	1e-05	14604.6
HCT Kaempherol	chr1:43814994	T/A	T	A	SNV	MPL	MPL : exonic : NM_005373.2	1		5.89	+	10	NM_005373.2	c.1529T>A	p.Leu510Gln	missense			2.46	0	113	0.716	0.769																	myelofibrosis	Myeloproliferative leukemia virus, homolog of	Golgi apparatus,cell proliferation,cell surface,cell surface receptor signaling pathway,integral component of plasma membrane,plasma membrane,protein binding,thrombopoietin receptor activity,thrombopoietin-mediated signaling pathway,transmembrane signaling receptor activity	Blood Coagulation Disorders;Blood Platelet Disorders;Bone Marrow Diseases;Glioma;Hematologic Diseases;Hemic and Lymphatic Diseases;Hemorrhagic Disorders;Medulloblastoma;Myeloproliferative Disorders;Neoplasms;Neoplasms by Histologic Type;Neoplasms, Germ Cell and Embryonal;Neoplasms, Glandular and Epithelial;Neoplasms, Nerve Tissue;Neoplasms, Neuroepithelial;Neuroectodermal Tumors;Neuroectodermal T…	Eltrombopag,Romiplostim,SB-559448		T=1868, A=117	T=0.9411, A=0.0589	1e-05	236.313
	chr2:212812097	C/C	T	C	SNV	ERBB4	ERBB4 : intronic : NM_005235.2	1		99.95	-		NM_005235.2	c.421+58A>G					-3.34					Furin-like cysteine rich region,Protein kinase domain,Protein tyrosine kinase,Receptor L domain	rs839541		0.355				YES										Avian erythroblastic leukemia viral (v-erb-b2) oncogene homolog 4	ATP binding,ERBB2 signaling pathway,MAPK cascade,Ras guanyl-nucleotide exchange factor activity,basolateral plasma membrane,cardiac muscle tissue regeneration,cell fate commitment,cell migration,cell proliferation,central nervous system morphogenesis,cytosol,embryonic pattern specification,epidermal growth factor receptor binding,extracellular region,heart development,integral component of membra…	Amyotrophic Lateral Sclerosis;Asthma;Biliary Tract Diseases;Biliary Tract Neoplasms;Brain Diseases;Breast Diseases;Breast Neoplasms;Bronchial Diseases;Cardiovascular Diseases;Central Nervous System Diseases;Diabetes Complications;Diabetes Mellitus;Diabetic Nephropathies;Digestive System Diseases;Digestive System Neoplasms;Endocrine System Diseases;Female Urogenital Diseases;Female Urogenital Dise…	Afatinib		T=1, C=1998	T=5.0E-4, C=0.9995	1e-05	33914.7
	chr3:41266133	CCTT/C	CCTT	C,CCTC,GCTT,TCTT	INDEL	CTNNB1	CTNNB1 : exonic : NM_001904.3	3	COSM6128	C=40.47, CCTC=0.36, GCTT=0.00, TCTT=0.00	+	3	NM_001904.3	c.133_135delTCT	p.Ser45del	nonframeshiftDeletion	pathogenic		7.82,7.82,-0.24,8.04				0.977,0.981	Armadillo/beta-catenin-like repeat	rs121913407															NS,adenocarcinoma,aldosterone_producing,anaplastic_carcinoma,cortisol_producing,functioning,hepatocellular_carcinoma,non_functioning	Catenin (cadherin-associated protein), beta 1, 88kD	I-SMAD binding,RNA polymerase II activating transcription factor binding,RNA polymerase II transcription factor binding,SMAD binding,Schwann cell proliferation,Scrib-APC-beta-catenin complex,T cell differentiation in thymus,Wnt signaling pathway,Wnt signaling pathway, calcium modulating pathway,Wnt signalosome,Z disc,adherens junction,adherens junction assembly,alpha-catenin binding,androgen rece…	Aberrant Crypt Foci;Adenocarcinoma;Adenoma;Adenoma, Liver Cell;Adnexal Diseases;Adrenal Cortex Diseases;Adrenal Cortex Neoplasms;Adrenal Gland Diseases;Adrenal Gland Neoplasms;Adrenocortical Carcinoma;Breast Diseases;Breast Neoplasms;Carcinoma;Carcinoma, Hepatocellular;Cardiovascular Diseases;Cecal Diseases;Cecal Neoplasms;Colonic Diseases;Colonic Neoplasms;Colorectal Neoplasms;Congenital Abnorma…	Urea	Pathogenic	CCTT=655, C=448, CCTC=4, GCTT=0, TCTT=0	CCTT=0.5917, C=0.4047, CCTC=0.0036, GCTT=0.0, TCTT=0.0	1e-05	5708.14
	chr3:178952085	A/G	A	G,T	SNV	PIK3CA	PIK3CA : exonic : NM_006218.3	1	COSM775	G=49.35, T=0.00	+	21	NM_006218.3	c.3140A>G	p.His1047Arg	missense	pathogenic		8.86		29	0.639	Pathogenic	PI3-kinase family, p85-binding domain,PI3-kinase family, ras-binding domain,Phosphatidylinositol 3- and 4-kinase,Phosphoinositide 3-kinase C2,Phosphoinositide 3-kinase family, accessory domain (PIK domain)	rs121913279							0.0;0.0 (pos.178952085)	0.0;0.0 (pos.178952085)	0.0;0.0 (pos.178952085)	0.0;0.0 (pos.178952085)	0.0;0.0 (pos.178952085)	1.505E-5;1.505E-5 (pos.178952085)	0.0;0.0 (pos.178952085)	8.317E-6;8.317E-6 (pos.178952085)	Brenner_tumour,CLOVES_syndrome,ER-HER-positive_carcinoma,ER-PR-HER-positive_carcinoma,ER-PR-positive_carcinoma,ER-positive_carcinoma,HER-positive_carcinoma,Hurthle_cell_carcinoma,Merkel_cell_carcinoma,NS,SHH_subtype,acinic_cell_carcinoma,adenocarcinoma,adenoid_cystic_carcinoma,adenoma,alveolar,anaplastic_carcinoma,astrocytoma_Grade_III,astrocytoma_Grade_IV,atypical,basal_(triple-negative)_carcino…	Phosphatidylinositol 3-kinase, catalytic, alpha polypeptide	1-phosphatidylinositol-3-kinase activity,1-phosphatidylinositol-4-phosphate 3-kinase activity,ATP binding,ERBB2 signaling pathway,Fc-epsilon receptor signaling pathway,Fc-gamma receptor signaling pathway involved in phagocytosis,T cell costimulation,T cell receptor signaling pathway,activation of protein kinase activity,adipose tissue development,angiogenesis,cardiac muscle contraction,cellular r…	Adenocarcinoma;Adnexal Diseases;Autoimmune Diseases;Breast Diseases;Breast Neoplasms;Bronchial Neoplasms;Carcinoma;Carcinoma, Adenoid Cystic;Carcinoma, Bronchogenic;Carcinoma, Hepatocellular;Carcinoma, Non-Small-Cell Lung;Carcinoma, Renal Cell;Carcinoma, Squamous Cell;Colonic Diseases;Colorectal Neoplasms;Colorectal Neoplasms, Hereditary Nonpolyposis;Congenital Abnormalities;Congenital, Hereditar…	(1S,6BR,9AS,11R,11BR)-9A,11B-DIMETHYL-1-(METHYLOXY)METHYL-3,6,9-TRIOXO-1,6,6B,7,8,9,9A,10,11,11B-DECAHYDRO-3H-FURO4,3,2-DEINDENO4,5-H2BENZOPYRAN-11-YL ACETATE,Caffeine,XL147,XL765	Likely pathogenic,Pathogenic,other	A=1013, G=987, T=0	A=0.5065, G=0.4935, T=0.0	1e-05	13785.5
	chr3:178952141	G/A	G	A	SNV	PIK3CA	PIK3CA : exonic : NM_006218.3	1	COSM6941468	7.04	+	21	NM_006218.3	c.3196G>A	p.Ala1066Thr	missense			7.4		58	0.141	Pathogenic	PI3-kinase family, p85-binding domain,PI3-kinase family, ras-binding domain,Phosphatidylinositol 3- and 4-kinase,Phosphoinositide 3-kinase C2,Phosphoinositide 3-kinase family, accessory domain (PIK domain)																luminal_NS_carcinoma,squamous_cell_carcinoma	Phosphatidylinositol 3-kinase, catalytic, alpha polypeptide	1-phosphatidylinositol-3-kinase activity,1-phosphatidylinositol-4-phosphate 3-kinase activity,ATP binding,ERBB2 signaling pathway,Fc-epsilon receptor signaling pathway,Fc-gamma receptor signaling pathway involved in phagocytosis,T cell costimulation,T cell receptor signaling pathway,activation of protein kinase activity,adipose tissue development,angiogenesis,cardiac muscle contraction,cellular r…	Adenocarcinoma;Adnexal Diseases;Autoimmune Diseases;Breast Diseases;Breast Neoplasms;Bronchial Neoplasms;Carcinoma;Carcinoma, Adenoid Cystic;Carcinoma, Bronchogenic;Carcinoma, Hepatocellular;Carcinoma, Non-Small-Cell Lung;Carcinoma, Renal Cell;Carcinoma, Squamous Cell;Colonic Diseases;Colorectal Neoplasms;Colorectal Neoplasms, Hereditary Nonpolyposis;Congenital Abnormalities;Congenital, Hereditar…	(1S,6BR,9AS,11R,11BR)-9A,11B-DIMETHYL-1-(METHYLOXY)METHYL-3,6,9-TRIOXO-1,6,6B,7,8,9,9A,10,11,11B-DECAHYDRO-3H-FURO4,3,2-DEINDENO4,5-H2BENZOPYRAN-11-YL ACETATE,Caffeine,XL147,XL765		G=1850, A=140	G=0.9296, A=0.0704	1e-05	357.89
	chr4:55946354	G/T	G	T	SNV	KDR	KDR : intronic : NM_002253.2	1		51.53	-		NM_002253.2	c.3849-24C>A					1.73					CD80-like C2-set immunoglobulin domain,Immunoglobulin I-set domain,Immunoglobulin V-set domain,Immunoglobulin domain,Protein kinase domain,Protein tyrosine kinase	rs10006115		0.072	0.0365	0.0788	0.0508	YES	2.476E-2 (pos.55946354)	9.641E-2 (pos.55946354)	6.541E-2 (pos.55946354)	3.674E-2 (pos.55946354)	7.998E-2 (pos.55946354)	4.085E-2 (pos.55946354)	8.512E-2 (pos.55946354)	5.236E-2 (pos.55946354)		Kinase insert domain receptor	ATP binding,Golgi apparatus,Hsp90 protein binding,angiogenesis,calcium-mediated signaling using intracellular calcium source,cell junction,cell migration involved in sprouting angiogenesis,cellular response to vascular endothelial growth factor stimulus,early endosome,embryonic hemopoiesis,endoplasmic reticulum,endosome,endothelium development,extracellular matrix organization,extracellular regio…	Adenocarcinoma;Bone Diseases;Bone Diseases, Developmental;Brain Diseases;Brain Ischemia;Breast Diseases;Breast Neoplasms;Carcinoma;Cardiovascular Diseases;Central Nervous System Diseases;Cerebral Hemorrhage;Cerebrovascular Disorders;Colonic Diseases;Colorectal Neoplasms;Congenital, Hereditary, and Neonatal Diseases and Abnormalities;Diabetes Complications;Diabetes Mellitus;Diabetic Nephropathies;…	3-(2-aminoquinazolin-6-yl)-1-(3,3-dimethylindolin-6-yl)-4-methylpyridin-2(1H)-one,3-(2-aminoquinazolin-6-yl)-4-methyl-1-3-(trifluoromethyl)phenylpyridin-2(1H)-one,4-2-4-chloro-3-(trifluoromethyl)phenylamino-3H-benzimidazol-5-yloxy-N-methyl-pyridine-2-carboxamide,6-chloro-N-pyrimidin-5-yl-3-{3-(trifluoromethyl)phenylamino}-1,2-benzisoxazole-7-carboxamide,ABT-869,AZD2171,Axitinib,CYC116,Cabozantini…		G=969, T=1030	G=0.4847, T=0.5153	1e-05	11583.3
	chr4:55972974	T/A	T	A	SNV	KDR	KDR : exonic : NM_002253.2	1	COSM149673	49.46	-	11	NM_002253.2	c.1416A>T	p.Gln472His	missense			-0.05	0.03	24	0.003	neutral	CD80-like C2-set immunoglobulin domain,Immunoglobulin I-set domain,Immunoglobulin V-set domain,Immunoglobulin domain,Protein kinase domain,Protein tyrosine kinase	rs1870377		0.212	0.2369	0.1101	0.1939	YES	9.352E-2 (pos.55972974)	4.637E-1 (pos.55972974)	2.307E-1 (pos.55972974)	2.857E-1 (pos.55972974)	1.691E-1 (pos.55972974)	2.333E-1 (pos.55972974)	1.061E-1 (pos.55972974)	2.198E-1 (pos.55972974)	NS,acute_myeloid_leukaemia,adenocarcinoma,alveolar,diffuse_large_B_cell_lymphoma,embryonal	Kinase insert domain receptor	ATP binding,Golgi apparatus,Hsp90 protein binding,angiogenesis,calcium-mediated signaling using intracellular calcium source,cell junction,cell migration involved in sprouting angiogenesis,cellular response to vascular endothelial growth factor stimulus,early endosome,embryonic hemopoiesis,endoplasmic reticulum,endosome,endothelium development,extracellular matrix organization,extracellular regio…	Adenocarcinoma;Bone Diseases;Bone Diseases, Developmental;Brain Diseases;Brain Ischemia;Breast Diseases;Breast Neoplasms;Carcinoma;Cardiovascular Diseases;Central Nervous System Diseases;Cerebral Hemorrhage;Cerebrovascular Disorders;Colonic Diseases;Colorectal Neoplasms;Congenital, Hereditary, and Neonatal Diseases and Abnormalities;Diabetes Complications;Diabetes Mellitus;Diabetic Nephropathies;…	3-(2-aminoquinazolin-6-yl)-1-(3,3-dimethylindolin-6-yl)-4-methylpyridin-2(1H)-one,3-(2-aminoquinazolin-6-yl)-4-methyl-1-3-(trifluoromethyl)phenylpyridin-2(1H)-one,4-2-4-chloro-3-(trifluoromethyl)phenylamino-3H-benzimidazol-5-yloxy-N-methyl-pyridine-2-carboxamide,6-chloro-N-pyrimidin-5-yl-3-{3-(trifluoromethyl)phenylamino}-1,2-benzisoxazole-7-carboxamide,ABT-869,AZD2171,Axitinib,CYC116,Cabozantini…	not provided	T=891, A=872	T=0.5054, A=0.4946	1e-05	9545.39
	chr4:55980239	T/T	C	T	SNV	KDR	KDR : intronic : NM_002253.2	1		99.53	-		NM_002253.2	c.798+54G>A					-0.3					CD80-like C2-set immunoglobulin domain,Immunoglobulin I-set domain,Immunoglobulin V-set domain,Immunoglobulin domain,Protein kinase domain,Protein tyrosine kinase	rs7692791		0.456 (ref)				YES										Kinase insert domain receptor	ATP binding,Golgi apparatus,Hsp90 protein binding,angiogenesis,calcium-mediated signaling using intracellular calcium source,cell junction,cell migration involved in sprouting angiogenesis,cellular response to vascular endothelial growth factor stimulus,early endosome,embryonic hemopoiesis,endoplasmic reticulum,endosome,endothelium development,extracellular matrix organization,extracellular regio…	Adenocarcinoma;Bone Diseases;Bone Diseases, Developmental;Brain Diseases;Brain Ischemia;Breast Diseases;Breast Neoplasms;Carcinoma;Cardiovascular Diseases;Central Nervous System Diseases;Cerebral Hemorrhage;Cerebrovascular Disorders;Colonic Diseases;Colorectal Neoplasms;Congenital, Hereditary, and Neonatal Diseases and Abnormalities;Diabetes Complications;Diabetes Mellitus;Diabetic Nephropathies;…	3-(2-aminoquinazolin-6-yl)-1-(3,3-dimethylindolin-6-yl)-4-methylpyridin-2(1H)-one,3-(2-aminoquinazolin-6-yl)-4-methyl-1-3-(trifluoromethyl)phenylpyridin-2(1H)-one,4-2-4-chloro-3-(trifluoromethyl)phenylamino-3H-benzimidazol-5-yloxy-N-methyl-pyridine-2-carboxamide,6-chloro-N-pyrimidin-5-yl-3-{3-(trifluoromethyl)phenylamino}-1,2-benzisoxazole-7-carboxamide,ABT-869,AZD2171,Axitinib,CYC116,Cabozantini…		C=7, T=1491	C=0.0047, T=0.9953	1e-05	25026
	chr5:149433595	G/G	GT	G	INDEL	CSF1R,HMGXB3	CSF1R : utr_3 : NM_005211.3, HMGXB3 : downstream : NM_014983.2	1		99.84	+, -		NM_014983.2, NM_005211.3	c.*37delA					0.04,0.82					Immunoglobulin domain,Protein kinase domain,Protein tyrosine kinase	rs2066934,rs35308019,rs386693509		0.203				YES	7.768E-1 (pos.149433596)	7.267E-1 (pos.149433596)	7.465E-1 (pos.149433596)	8.023E-1 (pos.149433596)	6.889E-1 (pos.149433596)	7.733E-1 (pos.149433596)	9.482E-1 (pos.149433596)	7.754E-1 (pos.149433596)		Colony-stimulating factor-1 receptor; oncogene FMS (McDonough feline sarcoma)	ATP binding,CSF1-CSF1R complex,DNA binding,axon guidance,biological_process,cell proliferation,cell surface,cell-cell junction maintenance,cellular response to cytokine stimulus,cellular response to macrophage colony-stimulating factor stimulus,cellular_component,cytokine binding,cytokine-mediated signaling pathway,forebrain neuron differentiation,hemopoiesis,inflammatory response,innate immune r…	Autoimmune Diseases;Brain Diseases;Breast Diseases;Breast Neoplasms;Central Nervous System Diseases;Female Urogenital Diseases;Female Urogenital Diseases and Pregnancy Complications;Glomerulonephritis;Glomerulonephritis, IGA;Immune System Diseases;Kidney Diseases;Leukemia;Leukemia, Myeloid;Leukemia, Myeloid, Acute;Leukoencephalopathies;Male Urogenital Diseases;Neoplasm Metastasis;Neoplasms;Neopla…	5-CYANO-FURAN-2-CARBOXYLIC ACID 5-HYDROXYMETHYL-2-(4-METHYL-PIPERIDIN-1-YL)-PHENYL-AMIDE,6-CHLORO-3-(3-METHYLISOXAZOL-5-YL)-4-PHENYLQUINOLIN-2(1H)-ONE,ABT-869,Imatinib,Sunitinib		GT=1, G=643	GT=0.0016, G=0.9984	1e-05	10857.6
	chr5:149433597	GA/GA	G	GA	INDEL	CSF1R,HMGXB3	CSF1R : utr_3 : NM_005211.3, HMGXB3 : downstream : NM_014983.2	1		98.92	+, -		NM_014983.2, NM_005211.3	c.*35insT					-0.26					Immunoglobulin domain,Protein kinase domain,Protein tyrosine kinase	rs2066933,rs386693509		0.204 (ref)	0.4213	0.3584	0.4959	YES	7.757E-1 (pos.149433597)	7.198E-1 (pos.149433597)	7.453E-1 (pos.149433597)	8.016E-1 (pos.149433597)	6.887E-1 (pos.149433597)	7.73E-1 (pos.149433597)	9.483E-1 (pos.149433597)	7.745E-1 (pos.149433597)		Colony-stimulating factor-1 receptor; oncogene FMS (McDonough feline sarcoma)	ATP binding,CSF1-CSF1R complex,DNA binding,axon guidance,biological_process,cell proliferation,cell surface,cell-cell junction maintenance,cellular response to cytokine stimulus,cellular response to macrophage colony-stimulating factor stimulus,cellular_component,cytokine binding,cytokine-mediated signaling pathway,forebrain neuron differentiation,hemopoiesis,inflammatory response,innate immune r…	Autoimmune Diseases;Brain Diseases;Breast Diseases;Breast Neoplasms;Central Nervous System Diseases;Female Urogenital Diseases;Female Urogenital Diseases and Pregnancy Complications;Glomerulonephritis;Glomerulonephritis, IGA;Immune System Diseases;Kidney Diseases;Leukemia;Leukemia, Myeloid;Leukemia, Myeloid, Acute;Leukoencephalopathies;Male Urogenital Diseases;Neoplasm Metastasis;Neoplasms;Neopla…	5-CYANO-FURAN-2-CARBOXYLIC ACID 5-HYDROXYMETHYL-2-(4-METHYL-PIPERIDIN-1-YL)-PHENYL-AMIDE,6-CHLORO-3-(3-METHYLISOXAZOL-5-YL)-4-PHENYLQUINOLIN-2(1H)-ONE,ABT-869,Imatinib,Sunitinib		G=7, GA=639	G=0.0108, GA=0.9892	1e-05	8094.88
	chr7:128846374	G/A	G	A	SNV	SMO	SMO : exonic : NM_005631.4	1	COSM13148	58.58	+	6	NM_005631.4	c.1210G>A	p.Val404Met	missense			9.84	0	21	0.999	Pathogenic	Frizzled/Smoothened family membrane region,Fz domain																NS,adenocarcinoma	Smoothened, Drosophila, homolog of,Spermine oxidase	G-protein coupled receptor activity,G-protein coupled receptor signaling pathway,Golgi apparatus,Wnt-activated receptor activity,Wnt-protein binding,anterior/posterior pattern specification,astrocyte activation,atrial septum morphogenesis,canonical Wnt signaling pathway,caveola,cell fate specification,cellular response to cholesterol,central nervous system neuron differentiation,cerebellar cortex…	Ameloblastoma;Bone Diseases;Bone Neoplasms;Brain Diseases;Brain Neoplasms;Carcinoma;Carcinoma, Basal Cell;Central Nervous System Diseases;Central Nervous System Neoplasms;Congenital Abnormalities;Congenital, Hereditary, and Neonatal Diseases and Abnormalities;Craniofacial Abnormalities;Jaw Abnormalities;Jaw Diseases;Jaw Neoplasms;Leukemia;Leukemia, Myeloid;Leukemia, Myeloid, Acute;Leukemia, Promy…	Fluocinonide,Halcinonide,Sonidegib,Vismodegib		G=688, A=973	G=0.4142, A=0.5858	1e-05	14522.9
	chr9:133738370	A/G	A	G	SNV	ABL1	ABL1 : exonic : NM_005157.5	1	COSM1674906	49.7	+	4	NM_005157.5	c.770A>G	p.Tyr257Cys	missense			9.29		194	1	Pathogenic	Protein kinase domain,Protein tyrosine kinase,SH2 domain,SH3 domain,Variant SH3 domain																NS,adenocarcinoma	Abelson murine leukemia viral (v-abl) oncogene homolog 1	ATP binding,B cell proliferation involved in immune response,B cell receptor signaling pathway,B-1 B cell homeostasis,Bergmann glial cell differentiation,DNA binding,DNA damage induced protein phosphorylation,Fc-gamma receptor signaling pathway involved in phagocytosis,SH3 domain binding,actin cytoskeleton,actin cytoskeleton organization,actin filament binding,actin filament branching,actin monom…	Adenocarcinoma;Bone Marrow Diseases;Breast Diseases;Breast Neoplasms;Carcinogenesis;Carcinoma;Digestive System Diseases;Digestive System Neoplasms;Esophageal Diseases;Esophageal Neoplasms;Gastrointestinal Diseases;Gastrointestinal Neoplasms;Head and Neck Neoplasms;Hematologic Diseases;Hemic and Lymphatic Diseases;Immune System Diseases;Immunoproliferative Disorders;Leukemia;Leukemia, Lymphoid;Leu…	1-4-(PYRIDIN-4-YLOXY)PHENYL-3-3-(TRIFLUOROMETHYL)PHENYLUREA,2-amino-5-3-(1-ethyl-1H-pyrazol-5-yl)-1H-pyrrolo2,3-bpyridin-5-yl-N,N-dimethylbenzamide,2-{(6-OXO-1,6-DIHYDROPYRIDIN-3-YL)METHYLAMINO}-N-4-PROPYL-3-(TRIFLUOROMETHYL)PHENYLBENZAMIDE,5-3-(2-METHOXYPHENYL)-1H-PYRROLO2,3-BPYRIDIN-5-YL-N,N-DIMETHYLPYRIDINE-3-CARBOXAMIDE,6-(2,6-DICHLOROPHENYL)-2-{3-(HYDROXYMETHYL)PHENYLAMINO}-8-METHYLPYRIDO2,3…		A=338, G=334	A=0.503, G=0.497	1e-05	3660.92
	chr9:133738378	G/A	G	A	SNV	ABL1	ABL1 : exonic : NM_005157.5	1		3.64	+	4	NM_005157.5	c.778G>A	p.Val260Met	missense			7.83		21	0.988		Protein kinase domain,Protein tyrosine kinase,SH2 domain,SH3 domain,Variant SH3 domain	rs772834697							0.0 (pos.133738378)	0.0 (pos.133738378)	0.0 (pos.133738378)	0.0 (pos.133738378)	0.0 (pos.133738378)	1.511E-5 (pos.133738378)	0.0 (pos.133738378)	8.356E-6 (pos.133738378)		Abelson murine leukemia viral (v-abl) oncogene homolog 1	ATP binding,B cell proliferation involved in immune response,B cell receptor signaling pathway,B-1 B cell homeostasis,Bergmann glial cell differentiation,DNA binding,DNA damage induced protein phosphorylation,Fc-gamma receptor signaling pathway involved in phagocytosis,SH3 domain binding,actin cytoskeleton,actin cytoskeleton organization,actin filament binding,actin filament branching,actin monom…	Adenocarcinoma;Bone Marrow Diseases;Breast Diseases;Breast Neoplasms;Carcinogenesis;Carcinoma;Digestive System Diseases;Digestive System Neoplasms;Esophageal Diseases;Esophageal Neoplasms;Gastrointestinal Diseases;Gastrointestinal Neoplasms;Head and Neck Neoplasms;Hematologic Diseases;Hemic and Lymphatic Diseases;Immune System Diseases;Immunoproliferative Disorders;Leukemia;Leukemia, Lymphoid;Leu…	1-4-(PYRIDIN-4-YLOXY)PHENYL-3-3-(TRIFLUOROMETHYL)PHENYLUREA,2-amino-5-3-(1-ethyl-1H-pyrazol-5-yl)-1H-pyrrolo2,3-bpyridin-5-yl-N,N-dimethylbenzamide,2-{(6-OXO-1,6-DIHYDROPYRIDIN-3-YL)METHYLAMINO}-N-4-PROPYL-3-(TRIFLUOROMETHYL)PHENYLBENZAMIDE,5-3-(2-METHOXYPHENYL)-1H-PYRROLO2,3-BPYRIDIN-5-YL-N,N-DIMETHYLPYRIDINE-3-CARBOXAMIDE,6-(2,6-DICHLOROPHENYL)-2-{3-(HYDROXYMETHYL)PHENYLAMINO}-8-METHYLPYRIDO2,3…		G=636, A=24	G=0.9636, A=0.0364	0.00237	26.2567
	chr12:25398280	GCCACC/GTCACC	GCCACC	AACACC,ACCACC,ACGACC,ATCACC,CACACC,CCCACC,GACACC,GCCACCACC,GCCACT,GCCATC,GCCGCC,GTCACC,TCCACC,TTCACC	SNV	KRAS	KRAS : exonic : NM_033360.3	1	COSM532	AACACC=0.00, ACCACC=0.10, ACGACC=0.00, ATCACC=0.05, CACACC=0.00, CCCACC=0.00, GACACC=0.20, GCCACCACC=0.00, GCCACT=0.10, GCCATC=0.10, GCCGCC=0.00, GTCACC=48.81, TCCACC=0.05, TTCACC=0.00	-	2	NM_033360.3	c.38G>A	p.Gly13Asp	missense	pathogenic		2.4,7.75,7.75,2.43,7.75,7.75	0	94	0.803	Pathogenic	Ras family,Ras of Complex, Roc, domain of DAPkinase	rs112445441							0.0 (pos.25398280),0.0 (pos.25398284),0.0 (pos.25398285)	0.0 (pos.25398280),0.0 (pos.25398284),1.256E-4 (pos.25398285)	0.0 (pos.25398280),0.0 (pos.25398284),0.0 (pos.25398285)	0.0 (pos.25398280),0.0 (pos.25398284),0.0 (pos.25398285)	0.0 (pos.25398284),0.0 (pos.25398285),7.061E-5 (pos.25398280)	0.0 (pos.25398280),1.873E-5 (pos.25398284),1.873E-5 (pos.25398285)	0.0 (pos.25398280),0.0 (pos.25398285),1.112E-4 (pos.25398284)	1.976E-5 (pos.25398284),1.976E-5 (pos.25398285),9.826E-6 (pos.25398280)	Hurthle_cell_carcinoma,NK-T_cell_lymphoma,NS,acute_myeloid_leukaemia,adenocarcinoma,adenoma,ductal_carcinoma,endometrioid_carcinoma,hepatocellular_carcinoma,intestinal_adenocarcinoma,mucinous_carcinoma,non_small_cell_carcinoma	Kirsten rat sarcoma-2 viral (v-Ki-ras2) oncogene homolog	ERBB2 signaling pathway,Fc-epsilon receptor signaling pathway,GDP binding,GMP binding,GTP binding,GTPase activity,LRR domain binding,MAPK cascade,Ras protein signal transduction,actin cytoskeleton organization,axon guidance,cytokine-mediated signaling pathway,cytoplasm,cytosol,endocrine signaling,epidermal growth factor receptor signaling pathway,epithelial tube branching involved in lung morphog…	Abnormalities, Multiple;Adenocarcinoma;Adenoma;Adnexal Diseases;Arthritis;Arthritis, Juvenile;Astrocytoma;Autoimmune Diseases;Biliary Tract Diseases;Biliary Tract Neoplasms;Bone Marrow Diseases;Breast Diseases;Breast Neoplasms;Bronchial Neoplasms;Carcinogenesis;Carcinoma;Carcinoma, Bronchogenic;Carcinoma, Ductal;Carcinoma, Hepatocellular;Carcinoma, Non-Small-Cell Lung;Carcinoma, Pancreatic Ductal…	(3,7,11-TRIMETHYL-DODECA-2,6,10-TRIENYLOXYCARBAMOYL)-METHYL-PHOSPHONIC ACID,FARNESYL DIPHOSPHATE		GCCACC=1002, AACACC=0, ACCACC=2, ACGACC=0, ATCACC=1, CACACC=0, CCCACC=0, GACACC=4, GCCACCACC=0, GCCACT=2, GCCATC=2, GCCGCC=0, GTCACC=967, TCCACC=1, TTCACC=0	GCCACC=0.5058, AACACC=0.0, ACCACC=0.001, ACGACC=0.0, ATCACC=5.0E-4, CACACC=0.0, CCCACC=0.0, GACACC=0.002, GCCACCACC=0.0, GCCACT=0.001, GCCATC=0.001, GCCGCC=0.0, GTCACC=0.4881, TCCACC=5.0E-4, TTCACC=0.0	1e-05	13660.2
	chr13:28610183	G/G	A	G	SNV	FLT3	FLT3 : intronic : NM_004119.2	1		99.7	-		NM_004119.2	c.1310-3T>C					1.33				neutral	Immunoglobulin domain,Protein kinase domain,Protein tyrosine kinase	rs2491231		0.437 (ref)	0.2179	0.293	0.3836	YES	7.186E-1 (pos.28610183)	7.435E-1 (pos.28610183)	7.02E-1 (pos.28610183)	7.989E-1 (pos.28610183)	6.013E-1 (pos.28610183)	7.702E-1 (pos.28610183)	2.756E-1 (pos.28610183)	6.993E-1 (pos.28610183)	NS,acute_myeloid_leukaemia	fms-related tyrosine kinase-3	ATP binding,B cell differentiation,animal organ regeneration,cellular response to cytokine stimulus,cellular response to glucocorticoid stimulus,common myeloid progenitor cell proliferation,cytokine receptor activity,cytokine-mediated signaling pathway,cytosol,dendritic cell differentiation,endoplasmic reticulum lumen,glucocorticoid receptor binding,hemopoiesis,integral component of plasma membra…	Cardiovascular Diseases;Embolism and Thrombosis;Hematologic Diseases;Hemic and Lymphatic Diseases;Immune System Diseases;Immunoproliferative Disorders;Leukemia;Leukemia, Biphenotypic, Acute;Leukemia, Lymphoid;Leukemia, Myeloid;Leukemia, Myeloid, Acute;Leukemia, Promyelocytic, Acute;Lymphatic Diseases;Lymphoproliferative Disorders;Neoplasms;Neoplasms by Histologic Type;Thrombosis;Vascular Diseases	ABT-869,AC220,MLN-518,MP470,Nintedanib,Ponatinib,Sorafenib,Sunitinib,XL999		A=6, G=1994	A=0.003, G=0.997	1e-05	33711.9
	chr18:48586344	C/T	C	T	SNV	SMAD4	SMAD4 : intronic : NM_005359.5	1		46.6	+		NM_005359.5	c.955+58C>T					-0.95					MH1 domain,MH2 domain			0.039	0.0729	0.0137	0.055	YES	0.0 (pos.48586334)	0.0 (pos.48586334)	0.0 (pos.48586334)	0.0 (pos.48586334)	0.0 (pos.48586334)	1.519E-5 (pos.48586334)	0.0 (pos.48586334)	8.338E-6 (pos.48586334)		Mothers against decapentaplegic, Drosophila, homolog of, 4	BMP signaling pathway,DNA binding,I-SMAD binding,R-SMAD binding,RNA polymerase II core promoter proximal region sequence-specific DNA binding,RNA polymerase II transcription factor binding,SMAD protein complex,SMAD protein complex assembly,SMAD protein signal transduction,activin responsive factor complex,atrioventricular canal development,atrioventricular valve formation,axon guidance,brainstem …	Adenocarcinoma;Brachydactyly;Breast Diseases;Breast Neoplasms;Carcinoma;Carcinoma, Ductal;Carcinoma, Ductal, Breast;Cardiovascular Abnormalities;Cardiovascular Diseases;Cholangiocarcinoma;Cognition Disorders;Colonic Diseases;Colorectal Neoplasms;Congenital Abnormalities;Congenital, Hereditary, and Neonatal Diseases and Abnormalities;Craniofacial Abnormalities;Deafness;Digestive System Diseases;Di…			C=1068, T=932	C=0.534, T=0.466	1e-05	9947
	chr22:24176287	G/A	G	A	SNV	DERL3,SMARCB1	SMARCB1 : intronic : NM_003073.4, DERL3 : downstream : NM_001135751.1	1	COSM1090	51.38	+, -		NM_003073.4, NM_001135751.1	c.1119-41G>A, c.*727C>T					-0.76				0.028	SNF5 / SMARCB1 / INI1	rs5030613		0.152	0.1284	0.125	0.1272	YES	1.694E-1 (pos.24176287)	1.716E-1 (pos.24176287)	2.018E-1 (pos.24176287)	2.551E-1 (pos.24176287)	2.784E-1 (pos.24176287)	1.743E-1 (pos.24176287)	1.439E-1 (pos.24176287)	2.033E-1 (pos.24176287)	acute_lymphoblastic_leukaemia,plasma_cell_myeloma	DER1-like domain family, member 3,SWI/SNF related, matrix associated, actin dependent regulator of chromatin, subfamily b, member 1	ATP-dependent chromatin remodeling,DNA binding,DNA integration,DNA repair,ER-associated ubiquitin-dependent protein catabolic process,RNA polymerase I CORE element sequence-specific DNA binding,RNA polymerase II core promoter proximal region sequence-specific DNA binding,RNA polymerase II distal enhancer sequence-specific DNA binding,SWI/SNF complex,Tat protein binding,XY body,blastocyst hatching…	Congenital, Hereditary, and Neonatal Diseases and Abnormalities;Genetic Diseases, Inborn;Heredodegenerative Disorders, Nervous System;Neoplasms;Neoplasms by Histologic Type;Neoplasms, Complex and Mixed;Neoplasms, Nerve Tissue;Neoplastic Syndromes, Hereditary;Nerve Sheath Neoplasms;Nervous System Diseases;Neurocutaneous Syndromes;Neurodegenerative Diseases;Neurofibroma;Neurofibromatoses;Rhabdoid T…			G=972, A=1027	G=0.4862, A=0.5138	1e-05	14588
[truncated: 3 more columns]
